# Supplementary material for: A global Data Assimilation of Moisture Patterns from 21 000–0 BP (DAMP-21ka) using lake level proxy records
Source: Copernicus journal article supplement (doi:10.5194/cp-20-2663-2024), 2024-12-03
Supplement: Supplementary file 1 [file cp-20-2663-2024-supplement.pdf]

Supplement of *Clim. Past*, 20, 2663–2684, 2024  
<https://doi.org/10.5194/cp-20-2663-2024-supplement>  
© Author(s) 2024. CC BY 4.0 License.

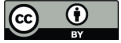

*Supplement of*

## **A global Data Assimilation of Moisture Patterns from 21 000–0 BP (DAMP-21ka) using lake level proxy records**

**Christopher L. Hancock et al.**

*Correspondence to:* Christopher L. Hancock (clh624@nau.edu)

The copyright of individual parts of the supplement might differ from the article licence.

## S1 Explanation of data assimilation parameters and equation

The following two equations describe the data assimilation methodology at each timestep:

$$x_a = x_b + K[y - y_e], \quad (\text{S1})$$

$$5 \quad K = \frac{w_{loc} * cov(y_e, x_b)}{cov(y_e, y_e) + R}, \quad (\text{S2})$$

In equation S1, the matrices  $x_b$  and  $x_a$  describe vectors of the prior and posterior respectively. Each matrix includes an ensemble of values for each climate variable and geographic location. The innovation ( $y - y_e$ ) is the difference between the proxy observations and the prior estimate of the proxy value as calculated by the proxy system model. The innovation is spread to each location and variable according to the Kalman gain matrix (K) which is a square root ensemble Kalman filter  
10 (Whitaker & Hamill, 2002).

As quantified by equation S2, K is a function of the covariance between the prior estimate ( $y_e$ ) with each climate variable at every grid cell ( $x_b$ ). This is the invaluable step of DA which updates the target climate variables according to the information contained by proxy observations to create a uniform gridded dataset. Two additional factors are also included in K: a localization radius matrix ( $w_{loc}$ ) and positive diagonal error covariance matrix (R).

15 As the geographic coordinates in the  $x_b$  matrix become more distant from the proxy observations,  $w_{loc}$  can decrease from 1 to 0 according to a predefined localization radius and is unitless. For the DAMP-21ka reanalysis, the  $w_{loc}$  matrix weights the innovation according to a fifth-order polynomial so that the K is reduced with distance from a given proxy sites and locations further than the cut-off radius are not updated (Gaspari & Cohn, 1999; Tardif et al., 2019). R represents the uncertainty of the proxy observation in the squared units of  $y_e$ . Specifically, a radius of 8,000 km and R of  $30^2$  (900) was selected based on  
20 validation experiments to test the sensitivity of these two parameters (Table S3). Overall, reconstruct skill is relatively insensitive to these parameter choices, but lake status reconstruction skill is generally highest with small localization radius and R values due to coherent trends among nearby lakes and differing proxy and model covariances between distant regions. However, skill metrics calculated using the withheld pollen data suggest that larger values may be more appropriate. We selected the chosen parameters based on their high skill as measured by correlation with calibrated precipitation records both  
25 globally and in North America which is the one region with high densities of both lake status and pollen proxy records.

30 **Table S1: List of lake status proxy records used in the data assimilation. The TSid is a unique identifier for the appropriate time**  
**series in the LiPD file. Duration represents the difference between the maximum and minimum age of the record. Any records**  
**spanning more than 21,000 years were assigned a duration of 21 kyr. Source indicates the data compilation from which the data**  
**was sourced. OLSDB ('89) refers to the Oxford Lake Status DataBank (Street-Perrott et al., 1989), ELSDB ('95) refers to the**  
35 **America Lake level DataBase (Yu and Harrison, 1995), FSUDB ('98) refers to the Former Soviet Union lake status DataBase**  
**(Tarasov et al., 1996), CLSDB ('01) refers to the Chinese Lake Status DataBase (Yu, 2001), NALDB ('20) refers to the North**  
**America Lake level DataBase (Liefert and Shuman, 2020), ESADB ('21) refers to the Eastern and Southern Africa lake status**  
**DataBase (De Cort et al., 2021), and ALSDB ('23) refers to the Australian Lake Status DataBase (Clerke, 2023). The publication**  
**column references the original data generators as identified by the data compilations. \* indicates sources for which the full citation**  
**was not provided by the data compilation.**

| Site (name)                    | TSid (unique identification in LiPD) | Lat (°) | Lon (°) | Elevation (m) | Duration (kyr) | Source (compilation) | Publication (original)                                     |
|--------------------------------|--------------------------------------|---------|---------|---------------|----------------|----------------------|------------------------------------------------------------|
| Achit Nur                      | glsdb_RtkfrU5Q83NdXulHJ              | 49.5    | 90.6    | 1435          | 15.4           | FSUDB ('98)          | Dorofeyuk (1988)                                           |
| Adley Lake (Parker's Prairie)  | pdRrmkVD3TsBOeoXn7g                  | 46      | -95     | 440           | 12.2           | NALDB ('20)          | Digerfeldt et al. (1992)                                   |
| Afrera                         | OLS_R7luETutJOR                      | 13.42   | 40.83   | -82           | 11.8           | OLSDB ('89)          | Bannert et al. (1970)                                      |
| Agadem                         | OLS_RF7pv7UUDFW                      | 16.83   | 13.33   | 350           | 10.3           | OLSDB ('89)          | Commelin (1980)                                            |
| Aiding Lake                    | glsdb_RbCJW18gQQ5mDFgHH              | 42.67   | 89.27   | 155           | 21             | CLSDB ('01)          | Li et al. (1988)                                           |
| Alexandersfontein              | OLS_RrOZmMhgLUP                      | -28.83  | 24.8    | 1119          | 21             | OLSDB ('89)          | Butzer (1973)                                              |
| Almora Lake (Parker's Prairie) | pdRdEGWYw7cNROLp8sM                  | 46.21   | -95.3   | 440           | 13             | NALDB ('20)          | Digerfeldt et al. (1992)                                   |
| Alsacia                        | OLS_RhL9KDPT14X                      | 3.9     | -73.85  | 3100          | 20.9           | OLSDB ('89)          | Melief (1982)                                              |
| Ard El Akhdar                  | OLS_R5sFsSYnjHw                      | 23.18   | 26.03   | 950           | 11.8           | OLSDB ('89)          | Kropelin (1987)                                            |
| Asal                           | OLS_ResQaXkZnvE                      | 11.6    | 42.5    | -155          | 14.2           | OLSDB ('89)          | Eldridge et al. (1975)                                     |
| Baijian Lake                   | glsdb_RjEVHNyZxfywU2jic              | 39.15   | 104.17  | 1282          | 21             | CLSDB ('01)          | Pachur et al., (1995); Zhang & Wunnemann, (1995)           |
| Baisuhai                       | glsdb_RaatZB8xeEnBB8tTF              | 42.59   | 115.93  | 2000          | 15.4           | CLSDB ('01)          | Cui & Kong (1992); Cui et al. (1993)                       |
| Balikon Lake                   | glsdb_RDmSvA8AF99lryMXS              | 43.7    | 92.8    | 1575          | 21             | CLSDB ('01)          | Han & Dong (1990); Han (1991); Han & Yuan (1990)           |
| Bancannia                      | OLS_RXfu7xAGzWB                      | -30.82  | 141.93  | 107           | 18.3           | OLSDB ('89)          | Dury (1973)                                                |
| Bangge Lake                    | glsdb_R3LT1FqtZDBMsNjfg              | 31.75   | 89.57   | 4520          | 21             | CLSDB ('01)          | Zheng et al. (1989)                                        |
| Bangongcuo                     | glsdb_R3g0c69M7SCu50zoJ              | 33.7    | 79.42   | 4241          | 21             | CLSDB ('01)          | Huang et al. (1989); Li et al. (1991); Juang et al. (1996) |
| Beaver Lake                    | pdRMMxRg4ypwnub7vhk                  | 42.45   | -100.65 | 910           | 12.9           | NALDB ('20)          | Schmieder et al. (2011, 2013);                             |
| Bebedero                       | OLS_R4idEFGEIHM                      | -33.33  | -66.75  | 380           | 21             | OLSDB ('89)          | Gonzalez (1983)                                            |
| Bebrukas                       | glsdb_RIEzYYPs4e8GiKQhu              | 54.12   | 24.55   | 160           | 13.2           | FSUDB ('98)          | *Kabailiene (1965)                                         |
| Beilikekule Lake               | glsdb_Rm3SK0WhnT8vFyYbK              | 36.72   | 89.05   | 4680          | 15.4           | CLSDB ('01)          | Li & Zhang (1991); Li (1992); Huang et al. (1996)          |
| BeloeChernoe                   | glsdb_R1CJxh2D87oB84p5l              | 55.72   | 37.35   | 145           | 13.7           | FSUDB ('98)          | *Uspenskaya (1979)                                         |
| Beysehvir                      | OLS_RaIxdqb5VXZ                      | 37.75   | 31.5    | 1120          | 21             | OLSDB ('89)          | Roberts (1980)                                             |
| Bilma                          | OLS_RPARZQXyu1l                      | 18.75   | 13      | 310           | 21             | OLSDB ('89)          | Delibrias et al. (1974)                                    |
| Bogoria                        | OLS_RtPtAFW735C                      | 0.3     | 36.1    | 990           | 18.3           | OLSDB ('89)          | Young et al. (1979)                                        |
| Boguda                         | glsdb_RE05qs4g8aUVyOPGk              | 63.67   | 123.25  | 117           | 10.6           | FSUDB ('98)          | Andreev & Klimanov (1989)                                  |
| Bolshoi Kisegach               | glsdb_RVcm86dQvT0y4jry6              | 55.04   | 60.38   | 317           | 12.8           | FSUDB ('98)          | Andreeva (1973)                                            |
| Bonneville                     | OLS_RLueiGtvS3m                      | 40.5    | -113    | 1280          | 21             | OLSDB ('89)          | Bright (1966)                                              |
| Borovoe                        | glsdb_Rua3xYFKdL77ZvIUq              | 53.08   | 70.27   | 321           | 16.1           | FSUDB ('98)          | *Berdovskaya (1989)                                        |

|                                     |                         |        |         |      |      |              |                                                                  |
|-------------------------------------|-------------------------|--------|---------|------|------|--------------|------------------------------------------------------------------|
| Bosumptwi                           | WEB25059875             | 6.5    | 1.42    | 76   | 21   | Original Pub | Shanahan (2006)                                                  |
| Bougdouma                           | OLS_RgJGZeaw0md         | 13.3   | 11.7    | 320  | 14.2 | OLSDB ('89)  | Gasse (1987)                                                     |
| Breadalbane                         | OLS_RnZixdO7vMV         | -34.78 | 149.48  | 697  | 11.8 | OLSDB ('89)  | Dodson (1986)                                                    |
| Bromfield                           | OLS_RwqOkY17CbA         | -17.38 | 145.55  | 755  | 11.8 | OLSDB ('89)  | Kershaw (1975)                                                   |
| Bufflehead Pond                     | pdRtg8eM5mtBLKQ8gkF     | 44.98  | -93.53  | 300  | 14   | NALDB ('20)  | Shuman et al. (2009)                                             |
| Buir Nur                            | glsdb_RYVsHCIS6xkVNNbFZ | 47.75  | 117.7   | 583  | 11.4 | FSUDB ('98)  | Dorofeyuk (1992)                                                 |
| Cahaba                              | OLS_RhSooYiv8NM         | 33.5   | -86.53  | 210  | 14.2 | OLSDB ('89)  | Delcourt et al. (1983)                                           |
| Carp                                | OLS_Rn9jxxYJDzK         | 45.92  | -122.88 | 714  | 21   | OLSDB ('89)  | Barnosky (1985)                                                  |
| Carson Sink                         | pdR3iBvTlj5zwy8bjTI     | 39.83  | -118.61 | 1180 | 15.5 | NALDB ('20)  | *Adams et al. (2009)                                             |
| Cayuga Lake                         | pdRHn2Pz80FEgrQMUn0     | 43     | -75.25  | 125  | 13   | NALDB ('20)  | *Mullins (1998)                                                  |
| Cepkeliu                            | glsdb_RsYW3Wp9Ydq6M6dWT | 54.02  | 24.52   | 130  | 12.8 | FSUDB ('98)  | *Tamosaitis & Grigelyte (1977)                                   |
| Chabada                             | glsdb_RtV73pXSxBTcbPdIn | 61.98  | 129.37  | 245  | 13.2 | FSUDB ('98)  | Andreev & Klimanov (1989);<br>Andreev et al. (1989)              |
| Chad                                | OLS_Raj0ajWk8Z1         | 13     | 14      | 282  | 21   | OLSDB ('89)  | Buckley et al. (1970)                                            |
| Chaerhan Salt Lake                  | glsdb_RtBqZresz13ZcXDiP | 36.93  | 94.99   | 2675 | 21   | CLSDB ('01)  | Zheng et al. (1989);<br>Huang et al. (1980; 1990)                |
| Chagannur                           | glsdb_RA6UOowbiRKHGx162 | 43.27  | 112.9   | 920  | 21   | CLSDB ('01)  | Zheng et al. (1982); Xu (1993)                                   |
| Chaiwopu Lake                       | glsdb_RPI4dkuJGNyHshPoW | 43.5   | 87.9    | 1092 | 21   | CLSDB ('01)  | Gu et al. (1990); Huang, (1990);<br>Li et al. (1990)             |
| Chany                               | glsdb_Rrakh9DbdtwzVOHjE | 54.82  | 77.5    | 106  | 18.2 | FSUDB ('98)  | *Orlova & Panychev (1985, 1986<br>)                              |
| Chemchane Aderg                     | OLS_RajLAejX7H1         | 21     | -12.12  | 260  | 21   | OLSDB ('89)  | Chamard (1973)                                                   |
| Chenghai                            | WEB2b92ddec             | 26.5   | 100.66  | 1500 | 13.9 | Original Pub | Xu et al. (2020)                                                 |
| Cheshi Mweru Wantipa                | OLS_RIUAKxfcWiL         | -8.87  | 29.68   | 928  | 21   | OLSDB ('89)  | Stager (1988)                                                    |
| Chiconahuapan                       | OLS_R2IDZP9z5wp         | 19.13  | -99.67  | 2575 | 12.9 | OLSDB ('89)  | Metcalfe et al. (1991)                                           |
| Chistoe                             | glsdb_R5HyGpw66PjeKOge7 | 55.78  | 38.32   | 160  | 13.7 | FSUDB ('98)  | Bolikhovskaya (1988);<br>Khotinskii (1977); Tyuremnov (1<br>956) |
| Clovis                              | OLS_RGC5Y4gspKt         | 34.25  | -103.33 | 1250 | 12.9 | OLSDB ('89)  | Damon et al. (1964)                                              |
| Crooked Pond                        | pdRFvsGhWnaWLNcJZOB     | 41.89  | -70.65  | 25   | 14.3 | NALDB ('20)  | *Shuman et al. (2001)                                            |
| Cröse Mere                          | glsdb_R2xWevaYQeuZtf6QD | 52.83  | -2.83   | 87   | 16.8 | ELSDB ('95)  | Beales (1980)                                                    |
| Daba Nur                            | glsdb_Rp5772NNZ6Zwnk9bF | 48.2   | 98.8    | 2465 | 13.2 | FSUDB ('98)  | Dorofeyuk (1988)                                                 |
| Dachaidan Xiaochaidan Salt<br>Lakes | glsdb_RJDRcZ4HMXXqp7Uln | 37.5   | 95.37   | 3110 | 21   | CLSDB ('01)  | Zheng et al. (1989);<br>Huang et al. (1980)                      |
| Dali Lake                           | WEB40d3e7b3             | 43.43  | 116.71  | 1226 | 15.2 | Original Pub | Goldsmith et al. (2017)                                          |
| Didwana                             | OLS_R4YTIxp5Scl         | 27.33  | 74.58   | 350  | 17.2 | OLSDB ('89)  | Singh et al. (1972)                                              |
| Diss Mere                           | glsdb_RsvGi6UQyUhPTbtTz | 52.37  | 1.1     | 26   | 13.7 | ELSDB ('95)  | Fritz (1989); Peglar (1984);<br>Peglar et al. (1989)             |
| Dobi Hanle                          | OLS_RcDGJfqpBeC         | 11.5   | 42      | 120  | 21   | OLSDB ('89)  | Fontes (1973)                                                    |
| Dolgeo                              | glsdb_RFTNDMCiPjnyQpZC  | 56.07  | 37.32   | 200  | 10.6 | FSUDB ('98)  | Korde (1959);<br>Kozlovskaya (1959)                              |
| Duck                                | OLS_RSzZCo2C7Xj         | 41.93  | -70     | 3    | 14.2 | OLSDB ('89)  | Winkler (1985)                                                   |
| Duncan Lake                         | pdRiNPVIQECax9xVLKu     | 44.65  | -107.45 | 2820 | 19.9 | NALDB ('20)  | Shuman et al. (2017)                                             |
| El Gobernador                       | OLS_R91mklW7AkS         | 3.85   | -74.35  | 3815 | 11.8 | OLSDB ('89)  | Melief (1983)                                                    |
| ElAbra                              | OLS_RFTxPMAWS1C         | 5      | -74     | 2570 | 21   | OLSDB ('89)  | Schreve-Brinkman (1978)                                          |

|                        |                         |        |         |      |      |             |                                                                    |
|------------------------|-------------------------|--------|---------|------|------|-------------|--------------------------------------------------------------------|
| Emerald Lake Leadville | pdRfvT1wuHIGXRlmUju     | 39.15  | -106.41 | 3055 | 15.4 | NALDB ('20) | Shuman et al. (2014)                                               |
| Enneri Bardague        | OLS_RphnQDokp38         | 21.5   | 17      | 1025 | 21   | OLSDB ('89) | Bottcher (1972)                                                    |
| Erjichuoer             | glsdb_RUCQtq2IEhHC8aceS | 45.23  | 116.5   | 829  | 18.2 | CLSDB ('01) | Zheng et al. (1992)                                                |
| Etosha                 | dc_RrHZZSKXL7RJv7P7b    | -18.81 | 16.3    | 1080 | 21   | ESADB ('21) | Buch & Zoller (1992);<br>Brook et al. (2007, 2011)                 |
| Fachi                  | OLS_RKoQn911SXJ         | 18.12  | 11.67   | 275  | 21   | OLSDB ('89) | Delibrias et al. (1966)                                            |
| FortRock               | OLS_RHt0P2iCpt5         | 43.17  | -120.75 | 1311 | 21   | OLSDB ('89) | Gilman (1975)                                                      |
| Frome                  | OLS_RTxbwsdvMwm         | -30.75 | 139.83  | -2   | 21   | OLSDB ('89) | Bowler et al. (1986)                                               |
| Fuquene                | OLS_Rbr7K7EZgsy         | 5.5    | -73.75  | 2580 | 21   | OLSDB ('89) | Van Geel (1973)                                                    |
| George                 | OLS_RfoenkHHXTE         | -35.08 | 149.42  | 800  | 21   | OLSDB ('89) | Bowler et al. (1976)                                               |
| George                 | OLS_Ree2SxMXXUS         | 43.52  | -73.65  | 96   | 14.2 | OLSDB ('89) | Hutchinson et al. (1981)                                           |
| Glubelka               | glsdb_RUQINrjgvSwYMsSo  | 54.95  | 26.42   | 166  | 11.4 | FSUDB ('98) | Yakushko & Makhnach (1973);<br>Yakushko et al. (1992)              |
| Gounongcuo             | glsdb_Rp4c98y81S2ZJrj09 | 34.35  | 92.2    | 4670 | 21   | CLSDB ('01) | Li et al. (1994,1995, 1996)                                        |
| Hassi El Mejna         | OLS_R2KxymoXwo          | 31.5   | 2.3     | 470  | 10.3 | OLSDB ('89) | Delibrias (1971)                                                   |
| Hay                    | OLS_R9wwlYbD32V         | 34     | -109.5  | 2780 | 21   | OLSDB ('89) | Haynes (1983)                                                      |
| Hockham Mere           | glsdb_Ra4xQK8OwTw1z75By | 52.5   | 0.83    | 33   | 14.5 | ELSDB ('95) | Bennett (1983); Sims<br>(1973,1978);<br>Godwin & Tallantire (1951) |
| Hook                   | OLS_RpZvDDmAq2c         | 42.95  | -89.33  | 260  | 14.2 | OLSDB ('89) | Winkler (1985)                                                     |
| Hoton Nur              | glsdb_Rk0ITwl7BTIVEBC1s | 48.67  | 88.3    | 2083 | 13.7 | FSUDB ('98) | Dorofeyuk (1988)                                                   |
| Ilmen                  | glsdb_RkUikr8SQCFj8WrSA | 58.3   | 31.23   | 18   | 12.8 | FSUDB ('98) | Davydova et al. (1992);<br>Khotinskii (1977)                       |
| Ioannina               | glsdb_RjLOckWdc5jmOF6OK | 39.66  | 20.88   | 469  | 21   | ELSDB ('95) | Bottema (1967, 1974);<br>Higgs & Vita-Finzi (1966)                 |
| Isle                   | OLS_RvAYM4Zh3Pk         | 52.62  | -114.43 | 700  | 11.8 | OLSDB ('89) | Heusser (1983)                                                     |
| Jacob                  | OLS_REuK7XDeRTY         | 34.42  | -110.83 | 2285 | 21   | OLSDB ('89) | Jacobs (1983)                                                      |
| Jilantai               | glsdb_RdTvvra5HoZr3h3nJ | 39.75  | 105.7   | 1023 | 20.4 | CLSDB ('01) | Zheng et al. (1992);<br>Geng & Cheng (1990)                        |
| Karase                 | glsdb_R0wYyScmVTALeUIL1 | 53.03  | 70.22   | 435  | 13.2 | FSUDB ('98) | *Aleshinskaya & Tarasov (1993)                                     |
| KathuPan               | dc_RHCKG5EIJhrgaen4p    | -27.66 | 23.01   | 1186 | 21   | ESADB ('21) | Beaumont et al. (1984)                                             |
| Kepa                   | glsdb_RQf8siYSAwqfszN5Q | 49.4   | 22      | 320  | 12.8 | ELSDB ('95) | Gerlach et al. (1972)                                              |
| Kettle Hole            | OLS_Ro4FH6vkuLB         | 43     | -95     | 350  | 14.2 | OLSDB ('89) | Collins (1968)                                                     |
| Khimaditis             | glsdb_RdhIPUVAXFrR1iyNn | 40.6   | 21.57   | 560  | 13.7 | ELSDB ('95) | Bottema (1974)                                                     |
| Khomustakh             | glsdb_RocWmUmkwyUkAuKj3 | 63.82  | 121.62  | 120  | 12.8 | FSUDB ('98) | Andreev et al. (1989)                                              |
| Kirchner               | OLS_Rcoxn5kpPMY         | 44.83  | -92.77  | 275  | 15.8 | OLSDB ('89) | Brugam (1980)                                                      |
| Kirikumae              | glsdb_RXKPCYPx94BPtRh1p | 57.67  | 27.25   | 183  | 11.4 | FSUDB ('98) | *Paap et al. (1975)                                                |
| Kivu                   | OLS_R4Ijw8OPsjM         | -2     | 29      | 1462 | 17.2 | OLSDB ('89) | Haberyan et al. (1987)                                             |
| Kotokol                | glsdb_RjATa8iSp6CMXJ8jl | 52.83  | 108.17  | 460  | 12.1 | FSUDB ('98) | *Vipper & Smimov (1979)                                            |
| Kow                    | OLS_RoBxNxe0ixb         | -36.2  | 144.3   | 83   | 17.2 | OLSDB ('89) | Macumber (1977)                                                    |
| Krasnokamsk            | glsdb_RgGWXjBi1AS1JYMVa | 58.05  | 55.7    | NA   | 12.8 | FSUDB ('98) | *Krylova (1986);<br>Kokarovtsev (1992)                             |
| La Guitarra            | OLS_RusPjLSBZcB         | 3.87   | -74     | 3450 | 18.3 | OLSDB ('89) | Melief (1984)                                                      |
| Lacha                  | glsdb_R7hkdOOGBJ3hKI7Sn | 62.59  | 37.67   | 118  | 11.4 | FSUDB ('98) | Davydova (1985);<br>Khomutova (1978)                               |

|                              |                          |        |         |      |      |            |                                                                                        |
|------------------------------|--------------------------|--------|---------|------|------|------------|----------------------------------------------------------------------------------------|
| Lake Abhe                    | dc_RoPJLIYkv4IUFO57o     | 11.2   | 41.8    | 240  | 21   | ESADB (21) | Gasse et al. (1977, 1978)                                                              |
| Lake Abiyata Ziway Shala     | dc_RAAfVOzQ1RfZpXCiJ     | 7.6    | 38.6    | 1578 | 13   | ESADB (21) | Gasse et al. (1978); Chalié et al. (2002)<br>Gillespie et al. (1983);                  |
| Lake Ashenge                 | dc_RySXeliWSRaYp83Ai     | 12.58  | 39.5    | 2440 | 16.9 | ESADB (21) | Marshall et al. (2009)                                                                 |
| Lake Baringo                 | dc_RqEwgBBmdSliiGTDX     | 0.53   | 36.08   | 965  | 16.9 | ESADB (21) | Williams & Johnson (1976);<br>Tiercelin et al. (1987);<br>Renaut et al. (2000)         |
| Lake Bullenmerri             | alsdb_RYICa3cQazrYcv5X8  | -38.25 | 143.1   | 145  | 16.9 | ALSDB (23) | De Deckker (1982); Dodson (1982);<br>Barton et al. (1981)                              |
| Lake Challa                  | dc_RUrpWCAvBwIWEH3fP     | -3.32  | 37.7    | 880  | 21   | ESADB (21) | Payne (1970); Moernaut et al. (2010);<br>Verschuren et al. (2009);                     |
| Lake Cochise                 | pdRNyQeqaj6PkSQYY4b      | 32.17  | -109.87 | 1260 | 16.4 | NALDB (20) | Waters (1989)                                                                          |
| Lake Euramoo                 | alsdb_Ry6VXVL0QFeNWdwNz  | -17.17 | 146.63  | 718  | 21   | ALSDB (23) | Kershaw (1970); Haberle (1970);<br>Tibby et al. (2007)                                 |
| Lake Gnotuk                  | alsdb_R6zkcwN3HGg789qJZ  | -38.21 | 142.88  | 102  | 12.2 | ALSDB (23) | Wilkins et al. (2012);<br>De Deckker (2012)                                            |
| Lake Keilambete              | alsdb_Rr5MbvKjYX3TKfPk4  | -38.22 | 143.1   | 104  | 10.9 | ALSDB (23) | Wilkins et al. (2012);<br>De Deckker (2012)                                            |
| Lake Malawi (Nyasa/Niassa)   | dc_RH8bNW06sFmsdTL5      | -12    | 34.5    | 468  | 21   | ESADB (21) | Beadle (1981);<br>Scholz & Rosendahl (1988);<br>Specht & Rosendahl (1989)              |
| Lake Masoko                  | dc_R3rschqd5bcegLVGp     | -9.33  | 33.76   | 840  | 21   | ESADB (21) | Williamson et al. (1999);<br>Barker et al. (2000);<br>Gibert et al. (2002)             |
| Lake Masoko                  | dc_R3rschqd5bcegLVGp     | -9.33  | 33.76   | 840  | 21   | ESADB (21) | Williamson et al. (1999); Barker et al. (2000); Gibert et al. (2002)                   |
| Lake Naivasha                | dc_RoV8HYeEOnZIZgucE     | -0.76  | 36.35   | 1885 | 21   | ESADB (21) | Richardson & Richardson (1972);<br>Washbourn-Kamau (1975);<br>Richardson et al. (1986) |
| Lake O' Pines                | pdRn4uVv5xmEy3QbRZo      | 46.14  | -89.25  | 520  | 13   | NALDB (20) | Ewing (2000)                                                                           |
| Lake of the Woods (Wyoming)  | pdRPXtR2BTqSS5KCKTm      | 43.48  | -109.89 | 2820 | 17.9 | NALDB (20) | Pribyl et al. (2014); Pribyl and Shuman (2014)                                         |
| Lake Rukwa (Likwa / Leopold) | dc_RWIDiCkaR8UFX6Fx7     | -8.42  | 32.72   | 802  | 19   | ESADB (21) | Clark et al. (1970); Haberyan (1987); Talbot et al. (1989)                             |
| Lake Tana                    | dc_RMdAeNBjait2JTtu0     | 12     | 37.25   | 1830 | 17.7 | ESADB (21) | Lamb et al. (2007); Marshall et al. (2011); Costa et al. (2014)                        |
| Lake Tanganyika              | dc_RhBiqnsOlyJ2R0fz8     | -6     | 29.5    | 773  | 21   | ESADB (21) | Livingstone (1965); Stoffers et al. (1978); Haberyan & Hecky (1987)                    |
| Lake Turkana (Rudolf)        | dc_RenAoTAYNasxf26Ji     | 3.5    | 36      | 362  | 19.5 | ESADB (21) | Butzer (1971);<br>Butzer et al. (1972)                                                 |
| Lake Victoria                | dc_ROZsNyyufSWArEMCn     | -1     | 33      | 1135 | 18   | ESADB (21) | Stuiver et al. (1960);<br>Kendall (1969);<br>Stager (1984)                             |
| Lake West Okoboji            | pdR889sQHZA5FOKA7S       | 46.3   | -95.2   | 430  | 14   | NALDB (20) | Van Zant (1979)                                                                        |
| Laksa                        | glsdb_RBIOJc9bH1Vf28A49  | 62.8   | 40.58   | 109  | 10.6 | FSUDB (98) | *Krylova (1987)                                                                        |
| Leconte                      | OLS_Rt3bq8OIkfc          | 33.33  | -116    | -71  | 15.8 | OLSDB (89) | Crane et al. (1958)                                                                    |
| Linton Loch                  | glsdb_RPAg7kaAQ6ze8ATy8N | 55.87  | -2.63   | 92   | 10.6 | ELSDB (95) | Mannion (1978, 1981, 1982)                                                             |
| Lisan Dead Sea               | OLS_Rz4NEhuh5D0          | 31.5   | 35.5    | -395 | 21   | OLSDB (89) | Bedwell (1973)                                                                         |

|                           |                         |        |         |      |      |             |                                                                                             |
|---------------------------|-------------------------|--------|---------|------|------|-------------|---------------------------------------------------------------------------------------------|
| Little Llangothlin Lagoon | alsdb_Rms0UCCjsgi0Y5tYS | -34    | 141     | 1350 | 21   | ALSDB ('23) | Woodward et al. (2014); Ellerton et al. (2014); Shulmeister et al. (2014)                   |
| Little Windy Hill Pond    | pdRkoO11xxFGVWJel62     | 41.43  | -106.34 | 3000 | 17.1 | NALDB ('20) | Pribyl et al. (2014)                                                                        |
| Lop Basin                 | glsdb_RbjxcQSIwOlswzL7N | 40.29  | 90.8    | 790  | 21   | CLSDB ('01) | Zheng et al. (1991); Wu (1994); Yan et al. (1983)                                           |
| Lubanas                   | glsdb_RPQs9txdKyr32AeNy | 56.77  | 26.92   | 91   | 12.8 | FSUDB ('98) | *Eberhards (1981)                                                                           |
| Lubbock                   | OLS_RF4kqHZt5Ej         | 33.63  | -101.9  | 975  | 12.9 | OLSDB ('89) | Holliday (1985)                                                                             |
| Lukcze                    | glsdb_RgdJzQFcRiLjgQsyM | 51.5   | 23      | 170  | 13.7 | ELSDB ('95) | Balaga (1982)                                                                               |
| Lunkaransar               | OLS_REKcgVZxfzQ         | 28.5   | 73.75   | 200  | 12.9 | OLSDB ('89) | Singh (1972)                                                                                |
| Lynchs Crater             | OLS_RFZ5ftnO2t2         | -17.37 | 145.7   | 760  | 18.3 | OLSDB ('89) | Kershaw (1974)                                                                              |
| Mababe                    | dc_R9TKQMS5jsRqd7Zg4    | -18.85 | 24.16   | 919  | 21   | ESADB ('21) | Shaw (1985); Shaw et al. (1986); Shaw & Thomas (1988)                                       |
| Magadi Natron             | OLS_R11U1UXxAIf         | -2.12  | 36.04   | 600  | 19.4 | OLSDB ('89) | Butzer et al. (1972)                                                                        |
| MaineSoroa                | OLS_RPogGSF6ido         | 13.12  | 12      | 315  | 12.9 | OLSDB ('89) | Durand (1984)                                                                               |
| Makepeace Cedar Swamp     | pdRXoXk6qKsU102x2C4     | 41.93  | -70.77  | 35   | 13.7 | NALDB ('20) | Newby et al. (2000); Shuman et al. (2004)                                                   |
| Malo Jezero               | glsdb_RBENxFEJ0h920UJ1w | 42.78  | 17.35   | 0    | 10.4 | ELSDB ('95) | Beug (1961; 1962)                                                                           |
| Manasi Lake               | glsdb_ROvgCXsqYcCKOhtU0 | 45.45  | 86      | 251  | 21   | CLSDB ('01) | Lin et al. (1996); Rhodes et al. (1996); Sun et al. (1994)                                  |
| Manyara                   | OLS_Rrt4iAcWTK          | -3.62  | 35.82   | 945  | 21   | OLSDB ('89) | White et al. (1982)                                                                         |
| Melekhovo                 | glsdb_R6rjJzNp3gs3fgaa9 | 56.83  | 38.5    | 150  | 12.8 | FSUDB ('98) | Khotinskii (1977)                                                                           |
| Melynllyn                 | glsdb_Ro03XZUZms80Hfgo4 | 53.12  | -4.12   | 632  | 11.4 | ELSDB ('95) | Walker (1978)                                                                               |
| Mendota                   | OLS_Rxv9LmnnQsQ         | 43.1   | -89.42  | 259  | 14.2 | OLSDB ('89) | Steventon et al. (1986)                                                                     |
| Mexico                    | OLS_RTsihKwmPMu         | 19.5   | -99     | 2240 | 21   | OLSDB ('89) | Bradbury (1971)                                                                             |
| Mirror Lake               | pdRmwkDfwe6u28KuWTK     | 43.95  | -71.7   | 350  | 16.9 | NALDB ('20) | *Davis & Ford (1982); *Davis et al., (1984)                                                 |
| Mobutu Sese Seko          | OLS_R0IYyZ8sKNw         | 1.5    | 31      | 619  | 21   | OLSDB ('89) | Harvey (1976)                                                                               |
| Moore                     | OLS_RwLxfQP11eP         | 53     | -110.5  | 500  | 14.2 | OLSDB ('89) | Schweger (1983)                                                                             |
| Nabta                     | OLS_Rrtm3chd7C5         | 23     | 31      | 250  | 21   | OLSDB ('89) | Wendorf (1980)                                                                              |
| Nakuru Elmenteita         | dc_R30M68aIOeosMJsf     | -0.4   | 36.17   | 1760 | 21   | ESADB ('21) | Washbourn-Kamau (1971); Butzer et al. (1972); Vareschi (1982)                               |
| Naroch                    | glsdb_Ry5wjkrUFZtb3ZMeJ | 54.85  | 26.85   | 120  | 16.1 | FSUDB ('98) | Yakushko et al. (1992); Yakushko (1987)                                                     |
| Ngami                     | dc_RdLFWQodnN5i4bkII    | -20.5  | 22.73   | 919  | 21   | ESADB ('21) | Shaw (1985); Shaw et al. (2003); Huntsman-Mapila et al. (2006)                              |
| Okoboji                   | OLS_R4a8rMDILX2         | 43.33  | -95.2   | 425  | 15.8 | OLSDB ('89) | Van Zant (1979)                                                                             |
| Osintsevo                 | glsdb_REw4m54skNbnw09Ru | 57.37  | 57.63   | 148  | 12.1 | FSUDB ('98) | *Kokarovtsev (1992)                                                                         |
| Owasco Lake               | pdR95vmKthSzyI9ntp3     | 42.75  | -77.5   | 350  | 13.6 | NALDB ('20) | *Dwyer et al. (1996)                                                                        |
| Owens Lake                | pdRKIOXqPCWJFftTUyC     | 36.45  | -117.97 | 1085 | 21   | NALDB ('20) | *Bacon et al. (2006)                                                                        |
| Padul                     | glsdb_R1cWI4BhMrruhzwNN | 37.03  | -4.63   | 785  | 21   | ELSDB ('95) | Florschütz et al. (1971); Vogel & Waterbolk (1972); Menéndez Amor & Florschütz (1962, 1963) |
| Paidre                    | glsdb_RefnHESLhtu4cgdZo | 58.27  | 25.5    | 51   | 13.2 | FSUDB ('98) | *M%onnill (1964)                                                                            |
| Pashennoe                 | glsdb_RVKZDSEqoU6WsFRuX | 49.37  | 75.4    | 871  | 13.7 | FSUDB ('98) | *Tarasov (1992)                                                                             |

|                                |                          |        |         |      |      |             |                                                                  |
|--------------------------------|--------------------------|--------|---------|------|------|-------------|------------------------------------------------------------------|
| Patzcuaro                      | OLS_ROKPLG6ezuC          | 19.58  | -101.58 | 2044 | 21   | OLSDB ('89) | Pollard (1982)                                                   |
| Pickereel                      | OLS_RifcIdFjsr2          | 43.5   | -97.33  | 395  | 11.8 | OLSDB ('89) | Haworth (1972)                                                   |
| Pluvis                         | glsdb_R9kAqDKMgd7FrTkAX  | 45.63  | 5.63    | 215  | 11.4 | ELSDB ('95) | Borel et al. (1987, 1990)                                        |
| Poukawa                        | OLS_RE8t9IMfyob          | -39.77 | 176.73  | 21   | 17.2 | OLSDB ('89) | McGlone (1978)                                                   |
| Punso                          | glsdb_RSG3OjjpuRvnTxcPT  | 57.68  | 27.25   | 183  | 11.4 | FSUDB ('98) | *Saare et al. (in press)                                         |
| Pyramid Lake                   | pdRAD00oGMqGUoHfFHZ      | 40.06  | -119.56 | 1155 | 21   | NALDB ('20) | Benson et al. (2002);<br>Briggs et al. (2005)                    |
| Quexil                         | OLS_RSQIFjVgiso          | 16.93  | -90.12  | 110  | 12.9 | OLSDB ('89) | Deevey (1978)                                                    |
| Raigastvere                    | glsdb_Rv3yiDEgizxQfMoh8  | 58.6   | 26.73   | 52   | 11.4 | FSUDB ('98) | *Pirrus et al. (1987)                                            |
| Rainbow Lake (Beartooths)      | pdRsQ687U7RBI0qSdyE      | 44.94  | -109.5  | 2960 | 17.9 | NALDB ('20) | Shuman et al. (2017)                                             |
| Rice Lake - Middle Basin       | pdRQvUAgiTzsooiU2HT      | 44.21  | -78.13  | 185  | 13   | NALDB ('20) | Yu & McAndrews (1994)                                            |
| Rice Lake - West Basin         | pdRymRCmOiv8zpgLvf       | 44.11  | -78.3   | 185  | 13   | NALDB ('20) | Yu & McAndrews (1994)                                            |
| Ruby                           | OLS_RXjJiwKiDO4          | 40.58  | -115.33 | 1818 | 21   | OLSDB ('89) | Thompson (1984)                                                  |
| Ruby Lake/Marshes (Franklin)   | pdRUteHT9P1yZhdRamQ      | 40.12  | -115.49 | 1820 | 21   | NALDB ('20) | *Thompson et al. (1990; 1992)                                    |
| Russell                        | OLS_R28mFojQksk          | 38.05  | -118.77 | 1951 | 21   | OLSDB ('89) | Fergusson et al. (1962)                                          |
| Rutz                           | OLS_RAcSotekegB          | 44.87  | -93.87  | 314  | 14.2 | OLSDB ('89) | Waddington (1969)                                                |
| Ryder Pond (Cape Cod, MA, USA) | pdRtkSoE1Q93x2JFV5i      | 41.97  | -70.03  | 0    | 16.9 | NALDB ('20) | Winkler et al. (1995)                                            |
| Saham Mere                     | glsdb_RjM6nrEzITtio9hiD  | 52.57  | 0.8     | 38   | 11.9 | ELSDB ('95) | Bennett, (1988)                                                  |
| Sambhar                        | OLS_RO2T7DUh8l2          | 27     | 75      | 360  | 12.9 | OLSDB ('89) | Agrawal (1971)                                                   |
| Sanguijuelas                   | glsdb_Ro7NNJldIdo1eOpe5t | 42.1   | -6.73   | 1050 | 18.6 | ELSDB ('95) | Menéndez Amor & Florschütz<br>(1961, 1963)                       |
| Schwemm                        | glsdb_RGnYlUrRxTgl7iJA5  | 47.58  | 12.17   | 664  | 10.5 | ELSDB ('95) | Oeggli (1988);<br>Oeggli & Eicher (1989)                         |
| Searles                        | OLS_RfD6MNIONoM          | 35.6   | -117.7  | 493  | 21   | OLSDB ('89) | Flint et al. (1958)                                              |
| Selima                         | OLS_R1vmDg2WuOy          | 21.32  | 29.34   | 200  | 11.8 | OLSDB ('89) | Haynes et al. (1979)                                             |
| Sevan                          | glsdb_RnpTnvzFRvJXRURM9  | 40.5   | 45.42   | 1898 | 14.5 | FSUDB ('98) | *Aleshinskaya (1980)                                             |
| Sevier Lake                    | pdRYwqALFxQB0DnOiiQ      | 39     | -113    | 1500 | 14.6 | NALDB ('20) | *Oviatt (1988)                                                   |
| Silver Lake (Mohave)           | pdR0bHPwOODs54avzaw      | 35.34  | -116.11 | 275  | 21   | NALDB ('20) | Wells et al. (2003)                                              |
| Somino                         | glsdb_Rdbe8liHHC4B9h4zR  | 56.6   | 38.8    | 134  | 11.4 | FSUDB ('98) | *Neustadt et al. (1965)                                          |
| Sporovskoe                     | glsdb_RXz420FakwN2Lo3jn  | 52.33  | 25.33   | 142  | 13.2 | FSUDB ('98) | *Krutous (1986, 1987)                                            |
| Sudoble                        | glsdb_RcEZctmeQoQfB4LhB  | 54.03  | 28.1    | 165  | 13.2 | FSUDB ('98) | Bogdel et al. (1983);<br>Elovicheva & Bogdel (1985)              |
| Suguta                         | dc_RaXS2zgzVE8Jup4hM     | 2.05   | 36.5    | 275  | 13.9 | ESADB ('21) | Truckle (1976); Garcin et al. (2009);<br>Junginger et al. (2014) |
| Tagua Tagua                    | OLS_ROVfSZGskJH          | -34.5  | -71.17  | 890  | 21   | OLSDB ('89) | Heusser (1983)                                                   |
| Tauca                          | OLS_R4P4Wwpe8Jd          | -19.5  | -68     | 3660 | 21   | OLSDB ('89) | Servant (1978)                                                   |
| Termit Ouest Kandel Bouzou     | OLS_RmpO87FXnN9          | 16.08  | 11.25   | 300  | 12.9 | OLSDB ('89) | Faure (1963)                                                     |
| Tigalmamine                    | OLS_RTKjwB4I6IZ          | 32.9   | -5.35   | 1626 | 18.5 | OLSDB ('89) | Lamb (1989)                                                      |
| Tritrivakely                   | OLS_RM81PKgdBEz          | -19.78 | 46.92   | 1800 | 12.9 | OLSDB ('89) | Burney (1987)                                                    |
| Tuuljarv                       | glsdb_RzgK9phQ7j32u2HQ8  | 57.69  | 27.14   | 257  | 11.4 | FSUDB ('98) | *Ilves & M%oemets (1987)                                         |
| Tyrrell                        | OLS_RIAO1405W9b          | -35.33 | 142.78  | 42   | 21   | OLSDB ('89) | Bowler et al. (1986)                                             |
| Upper Big Creek Lake           | pdRopkg65IV11NRNtq6      | 40.91  | -106.62 | 2750 | 12.7 | NALDB ('20) | Shuman et al. (2015)                                             |



|                           |                                |       |         |      |      |              |                                                                         |
|---------------------------|--------------------------------|-------|---------|------|------|--------------|-------------------------------------------------------------------------|
| Urmia                     | OLS_RnQ2dbxrF5X                | 37.63 | 45.5    | 1284 | 15.8 | OLSDB ('89)  | Kelts et al. (1986)                                                     |
| Uvildy                    | glsdb_RX9BFmh1qNkFJyKqJ        | 55.53 | 62.37   | 273  | 14.5 | FSUDB ('98)  | Andreeva (1973);<br>Khotinskii (1977)                                   |
| Uyuni Basin               | WEB-10716-8d22-462f-846c-895e0 | -20   | -68     | 3660 | 17.8 | Original Pub | Placzek et al. (2006)                                                   |
| Valdaiskoe                | glsdb_R1oC3wYqH5GVhkJoo        | 57.98 | 33.27   | 192  | 13.7 | FSUDB ('98)  | Arslanov et al. (1992);<br>Khotinskii (1977)                            |
| Valencia                  | OLS_RVw6wiN8ACI                | 10.1  | -67.75  | 402  | 15.8 | OLSDB ('89)  | Bradbury (1981)                                                         |
| Wabamun                   | OLS_RblGnR4xJrB                | 53.5  | -114.25 | 732  | 10.3 | OLSDB ('89)  | Fritz (1973)                                                            |
| Walker                    | OLS_RzqaAnmlHbH                | 35.5  | -111.67 | 2700 | 21   | OLSDB ('89)  | Long et al. (1981)                                                      |
| Wanum                     | OLS_Roe2Ri2GOD9                | -6.63 | 146.78  | 35   | 11.8 | OLSDB ('89)  | Garrett-Jones (1979)                                                    |
| Washburn                  | OLS_RXKCFWVRanL                | 43.53 | -89.65  | 248  | 11.8 | OLSDB ('89)  | Winkler (1985)                                                          |
| Weber                     | OLS_Rh1QgEylyEm                | 47.47 | -91.65  | 559  | 12.9 | OLSDB ('89)  | Fries (1962)                                                            |
| Wedge                     | OLS_RtESqFQmPOU                | 50.87 | -115.17 | 1500 | 11.8 | OLSDB ('89)  | MacDonald (1982)                                                        |
| West Twin Lake (Nebraska) | pdRfOJh6SjJ3emsFmsY            | 42.4  | -101.44 | 1045 | 15   | NALDB ('20)  | Schmieder et al. (2011);<br>Schmieder et al. (2013)                     |
| White                     | OLS_R4QPDsP0JVX                | 34.16 | -80.76  | 90   | 21   | OLSDB ('89)  | Watts (1980)                                                            |
| Wielkie Gacno             | glsdb_RnL0bU24wi4sFRD2H        | 53.73 | 17.2    | 130  | 13.7 | ELSDB ('95)  | Brodin (1985); Hjelmroos<br>(1981, 1982) Hjelmroos-<br>Ericsson (1981); |
| Wintergreen               | OLS_RzEmio4JrEJ                | 42.4  | -85.38  | 271  | 15.8 | OLSDB ('89)  | Manny et al. (1978)                                                     |
| Wulanwula Lake            | glsdb_RPWOSpiG4JWwOZfE7        | 34.8  | 90.5    | 4854 | 21   | CLSDB ('01)  | Hu (1995); Li et al. (1995);<br>Shan et al. (1996)                      |
| Xiaoshazi Lake            | glsdb_RcpjnSVfRHxJ7RmJr        | 36.97 | 90.73   | 4106 | 15.4 | CLSDB ('01)  | Li & Zhang (1991); Li (1992);<br>Huang et al. (1996)                    |
| Zabuye Lake               | glsdb_R3FgE1qAAXCwTIEDY        | 31.35 | 84.07   | 4421 | 21   | CLSDB ('01)  | Zheng et al. (1989);<br>Zheng et al. (1996); Qi &<br>Zheng (1995)       |
| Zeribar                   | OLS_R14ZgdIg3vP                | 35.53 | 46.12   | 1300 | 21   | OLSDB ('89)  | Hutchinson et al. (1963)                                                |
| Zhacang Caka              | glsdb_RytCIFIhIFGSboHSh        | 32.6  | 82.38   | 4328 | 21   | CLSDB ('01)  | Huang et al. (1980);<br>Zheng et al. (1989)                             |
| Zhangzang Chaka           | OLS_RAPLKNVwmJW                | 32.5  | 82.33   | 6000 | 19.4 | OLSDB ('89)  | Fu-Bao et al. (1987)                                                    |

**Table S2: List of pollen proxy records calibrated to mean annual precipitation. These data were used to independently validate data assimilation. The TSid is a unique identifier for the appropriate time series in the LiPD file. Duration represents the difference between the maximum and minimum age of the record. Any records spanning more than 21,000 years were assigned a duration of 21 kyr. Records are compiled by Hancock et al. (2023) for the Holocene Hydroclimate (HH) dataset. LC indicates those from the Legacy Climate dataset (Herzschuh et al., 2023).**

| Site (name)         | TSid (unique identification in LiPD) | Lat (°) | Lon (°) | Duration (kyr) | Source (compilation) | Original (Publication) |
|---------------------|--------------------------------------|---------|---------|----------------|----------------------|------------------------|
| Achit Nuur          | lcRHktvc1HMQRItXv6E                  | 51.58   | 104.85  | 20.6           | LC                   | Sun (2013)             |
| Aegelsee            | lcRiO79S9Ix3TwY9hPY                  | 46.65   | 7.54    | 13.7           | LC                   | Lotter (1991)          |
| Agerods Mosse       | lcRxTTrPDKVUtCf7rs                   | 55.93   | 13.43   | 10.2           | LC                   | Nilsson (1964)         |
| Albany River Bog    | lcRzIW3oGuXnInc3Msu                  | 51.44   | -83.62  | 5.9            | LC                   | Glaser et al. (2004)   |
| Alp Lusga Belalp 1  | lcR2SXIdl9wohfxxdbD                  | 46.23   | 7.59    | 7.7            | LC                   | van der Knaap (1997)   |
| Alut Lake           | lcRDoKSIIINMOKI1PqMf                 | 60.14   | 152.31  | 21             | LC                   | Anderson (2002)        |
| Andy                | PYTCPIAO06Y                          | 64.65   | -128.08 | 13.2           | HH                   | Szeicz et al. (1995)   |
| Avstjonna           | lcR9GEASzqUKcowM16T                  | 61.65   | 9.88    | 13             | LC                   | Birks (2012)           |
| Ayoo de Vidriales   | lcRXz9wnyglFdmBJCJe                  | 42.13   | -6.07   | 16.7           | LC                   | Morales-Molino (2014)  |
| Baahar Nuur Lake    | lcRDISFQ3FGujgZJ3LN                  | 39.32   | 109.27  | 5.8            | LC                   | Huang (2009)           |
| Bakaly              | lcRKi1dhBq6WuciB6US                  | 41.87   | 71.96   | 6.9            | LC                   | Beer (2008)            |
| Battle Ground Lake  | lcRM5YQeikjGgODpYRD                  | 45.8    | -122.49 | 21             | LC                   | Barnosky (1983)        |
| Bayanchagan Lake BY | lcRmLoUTd7IMmW7hE5                   | 41.65   | 115.21  | 11.5           | LC                   | Jiang (2006)           |
| Beaverhouse Lake    | lcROtmDEQsOa6CKzEBo                  | 46.15   | -85.49  | 6.2            | LC                   | Ritchie (1976)         |
| Beaver Lake         | lcRhawpU8yMeacBLgK                   | 44.92   | -88.16  | 5.8            | LC                   | Calcote (2003)         |
| Bebrukas Lake       | lcRuTlqjPrHd2xH329d                  | 54.09   | 24.12   | 14.5           | LC                   | Kabailiene (1986)      |
| Bebrukas Lake       | lcRYFM1oW2BMemcgWT                   | 54.09   | 24.12   | 17.2           | LC                   | Kabailiene (1986)      |
| Bebrukas Lake       | lcR7JrQa2JW0MEcIlwG                  | 54.09   | 24.12   | 17.2           | LC                   | Kabailiene (1986)      |
| Begbie Lake         | lcRfmVxd7PePxtBtxX                   | 48.59   | -123.68 | 14             | LC                   | Brown et al. (2019)    |
| Bell's Lake         | lcRCIhUix5QOaVYiSJ3                  | 65.02   | -127.48 | 12.2           | LC                   | Szeicz et al. (1995)   |
| Benson Pond         | lcRyuLsI0devWnXL9UK                  | 42.38   | -73.09  | 14.7           | LC                   | Oswald et al. (2018)   |
| Berry Pond          | lcRmoUYX9CAfAdUW9Re                  | 42.62   | -71.09  | 14.9           | LC                   | Whitehead (1979)       |
| Berry Pond          | lcRFk9bWYJHqyCtFNx8                  | 42.5    | -73.32  | 14.2           | LC                   | Whitehead (1979)       |
| Bibersee            | lcRux6T4mIrY0kwQeJs                  | 47.21   | 8.47    | 14.2           | LC                   | van der Knaap (2001)   |
| Bitsch-Naters       | lcRoCXWdV0uxUvztLb                   | 46.34   | 7.99    | 11.1           | LC                   | van der Knaap (1997)   |
| Biviere di Gela     | lcRvxK7zhrGHqmmSr5                   | 37.02   | 14.34   | 7.5            | LC                   | Colombaroli (2009)     |
| Black Gum Swamp     | lcRLcJzCjoqgEKwHqBs                  | 42.54   | -72.18  | 14.5           | LC                   | Foster et al. (1993)   |
| Blood Pond          | lcRFOyuRIeyddE3MuQ9                  | 42.08   | -71.96  | 15.2           | LC                   | Oswald et al. (2018)   |
| Boomerang Lake      | WEB31e807ae                          | 49.18   | -124.16 | 11.8           | HH                   | Brown et al. (2006)    |
| Brede Bridge        | lcRraSSIL4ehrOMpeyc                  | 50.91   | 0.68    | 5.9            | LC                   | Waller (1994)          |
| Breitnau-Neuhof     | lcRWWzCPyjezteZo74a                  | 47.93   | 8.07    | 12.7           | LC                   | Rosch (1989)           |
| Bruckmisse          | lcR4iehaNeTVyPOO2np                  | 48.73   | 8.64    | 4.9            | LC                   | Rosch (2009)           |
| Bruckmisse          | lcRseG41EyZPFn7vBuL                  | 48.73   | 8.64    | 7.7            | LC                   | Rosch (2009)           |
| Brurskardtjorni     | lcRLALDzbV8deV0FSpS                  | 61.42   | 8.67    | 12.1           | LC                   | Bjune (2005)           |

|                            |                     |       |         |      |    |                          |
|----------------------------|---------------------|-------|---------|------|----|--------------------------|
| Buck Lake                  | lcRI0mh5hio8SI6zqLN | 46.52 | -86.35  | 7.7  | LC | no pub on record         |
| Bugristoe                  | lcRQoeD5swxv5zB9KeA | 58.25 | 85.17   | 7    | LC | Blyakharchuk (1989)      |
| Bulgarian Black Sea        | lcRUewusWi9G28ut2a  | 42.47 | 28.41   | 12.4 | LC | Filipova-Marinova (2014) |
| Burden Lake                | lcRi9rpgU3KNzoGhTeP | 42.6  | -73.56  | 9.7  | LC | Gaudreau (1986)          |
| Caddo Creek (Core 3)       | lcRPzK3boIAUBI4YPWm | 32.05 | -95.51  | 7    | LC | Albert (2011)            |
| Cahaba Pond                | lcRVRnI9YOspeS2qWJq | 33.5  | -86.53  | 14.1 | LC | Delcourt et al. (1983)   |
| Camp 11 Lake               | lcRYUf2GzuKWajw7ClS | 46.67 | -88.02  | 11.7 | LC | Brubaker (1975)          |
| Cangumiao                  | lcRJ9bcRX8zajMu6bEY | 38.97 | 118.6   | 5.3  | LC | Xu (2004)                |
| Canyon Lake                | lcRPBnamW5NHR8VPMKn | 46.83 | -87.92  | 11.7 | LC | Davis et al. (1991)      |
| Cape Shpindler             | lcRaeEm3p5q0v5R3dkJ | 69.72 | 62.8    | 14.6 | LC | Andreev (2001)           |
| Capitola Lake              | lcRH47ExCxsXc3fhZVO | 45.52 | -89.56  | 10   | LC | Calcote (2003)           |
| Carquefou                  | lcRI8sX3O0JpEYZLbI  | 47.31 | -1.48   | 4.6  | LC | Cyprien (2001)           |
| Chadianpo                  | lcRxjdbi8n5mfOcteLV | 36.1  | 114.4   | 4.2  | LC | Zhang (2007)             |
| Chantemerle                | lcRKR2FoiqFt9fd0w2J | 45.92 | 0.02    | 4.6  | LC | Fauquette (1999)         |
| Chaohu Lake CH1            | lcRRQAEsiOSvKg2mTq7 | 31.56 | 117.39  | 11.3 | LC | Wu (2008)                |
| Charco da Candieira        | lcRz2jkIJHwfxKMvv1z | 40.34 | -7.58   | 14.7 | LC | Van der Knaap (1994)     |
| Chesapeake Bay (MD99-2209) | lcR8NsSZHAIFlbVWP   | 38.89 | -76.39  | 7.2  | LC | Willard et al. (2005)    |
| Chifeng-Qiguo Mt.          | lcR03YZlwKcvi9NBBso | 42.28 | 118.97  | 8.7  | LC | Xu (2002)                |
| Chuna Lake                 | PYTI39I3N0G         | 67.95 | 32.48   | 8.8  | HH | Solovieva et al. (2005)  |
| Cinq-Mars-la-Pile          | lcReM30B315r999fKee | 47.34 | 0.45    | 9.2  | LC | Carcaud (2002)           |
| Clear Lake                 | lcRm2HAyL9Ow8Vn9ldV | 41.64 | -86.54  | 16   | LC | Baker et al. (1992)      |
| Clear Lake                 | lcRKZoswtatqh9p86e  | 43.13 | -93.43  | 13.8 | LC | Baker et al. (1992)      |
| Col des Lauzes             | lcRScfMGWPopeFIEwve | 44.77 | 6.54    | 13.9 | LC | de Beaulieu (1977)       |
| Compass Pond               | lcRRxSlrTN8OVtHnbmp | 50.03 | -56.2   | 15.3 | LC | Blake Jr (1986)          |
| Cooley Lake                | lcRUbe6c1j2j2brmI3y | 49.49 | -117.65 | 7.5  | LC | Gavin et al. (2006)      |
| Coppermine Saddleback      | lcRE5QbPJ0FLNw7ktuv | 67.83 | -115.32 | 4.2  | LC | no pub on record         |
| Crater Lake                | lcRQgznauTtY1MfGgdK | 49.19 | -120.1  | 12.7 | LC | Heinrichs et al. (2002)  |
| Crowfoot Lake              | lcRlSbmXFmyXRKKhM7a | 51.65 | -116.42 | 13.6 | LC | no pub on record         |
| Csogle                     | lcRtQQC74Cocv8dlqiq | 47.22 | 17.25   | 7.1  | LC | Juhasz (2002)            |
| Dags Mosse                 | lcRBfIzOEaoKY4OpCu0 | 58.32 | 14.71   | 8.8  | LC | Goransson (1989)         |
| Dailey Lake                | lcRWXs1OS7FPp0sIIOC | 45.26 | -110.82 | 14.1 | LC | Krause et al. (2015)     |
| Dallican Water             | lcRYN4y5FCQn0BuDu6s | 60.39 | -1.1    | 11.1 | LC | Bennett (1992)           |
| Darko                      | lcRPtpeHk3QmKrusMf8 | 49.64 | 15.87   | 14.2 | LC | Rolecek (2020)           |
| Deep Lake                  | NAm2kHydro215       | 41.62 | -70.58  | 11   | HH | Marsicek et al. (2013)   |
| Deep-Falmouth Pond         | lcRIZG93oUnsBEDKSaM | 41.56 | -70.64  | 15.6 | LC | Oswald et al. (2018)     |
| Deep-Taunton Pond          | lcRgG0nqmKpMbG6TnGY | 41.88 | -71.01  | 16.1 | LC | Oswald et al. (2018)     |
| Delorme 2                  | lcRICjQTzvniz5Xlx4q | 54.42 | -69.93  | 7    | LC | Richard et al. (1982)    |
| Devil's Bath tub           | lcRDYi20GIO0AonbO2J | 43.02 | -77.57  | 11.6 | LC | Clark et al. (1996)      |
| Divers Lake                | lcRkBG2IjDkwtqKcx6y | 43.04 | -78.4   | 15.4 | LC | Miller (2003)            |
| Doel                       | lcRf6K3Ujfi8s5aGQ2k | 51.32 | 4.25    | 6.3  | LC | Deforce (2011)           |
| Dolgee Lake                | PYTISXSSSBC         | 71.87 | 127.07  | 14.1 | HH | Wolfe et al. (2000)      |

|                       |                     |       |         |      |    |                            |
|-----------------------|---------------------|-------|---------|------|----|----------------------------|
| Domsvatnet            | lcRnIxDI1N0JmJywI9G | 70.33 | 31.03   | 11   | LC | Hyvarinen (1976)           |
| Donggi Cona           | WEBbf48ea2b         | 35.22 | 98.33   | 12.1 | HH | Chen et al. (2020); (2014) |
| Donvold               | lcRnH3jf8tH4CILnO43 | 68.13 | 13.58   | 8.9  | LC | Nilssen (1983)             |
| Dossaccio Bormio      | lcR9AhAppvA2OXgJvAi | 46.47 | 10.34   | 12.8 | LC | van der Knaap (1997)       |
| Dragonfly Lake        | lcRZoZg8mFwmuOuhnO7 | 60.81 | -135.34 | 10.8 | LC | Edwards et al. (2015)      |
| Dune Lake             | lcRXeYkFhQZcl9FryEQ | 64.42 | -149.9  | 12.6 | LC | Bigelow (1997)             |
| Dvur Ansov            | lcR1bQbrAuTWjAjkdSV | 48.78 | 16.42   | 8.9  | LC | no pub on record           |
| Eggen ob Blatten      | lcRouwX4QfecNxAemPx | 46.37 | 7.99    | 8.3  | LC | van der Knaap (1997)       |
| El Maillio mire       | lcRYHQZme5i2N0fBzz0 | 40.55 | -6.21   | 10.7 | LC | Morales-Molino (2013)      |
| Embouchac             | lcRhScBDOFwzXEnwp1A | 43.57 | 3.92    | 8.1  | LC | Puertas (1997)             |
| Enos Lake             | WEB10ea8a20         | 49.28 | -124.15 | 10.5 | HH | Brown et al. (2006)        |
| Etang d'y Cor Montana | lcRR7x41VDYDCPUJV8T | 46.31 | 7.48    | 15.5 | LC | van der Knaap (1997)       |
| Felchowsee            | lcRRB14D2Fg9Zb4tvGP | 53.06 | 14.13   | 5.4  | LC | Jahns (2000)               |
| Felchowsee            | lcRpbhIeSqLqRxKnBNF | 53.06 | 14.13   | 7.3  | LC | Jahns (2000)               |
| Found Lake            | lcRSMVjIC246WXbuLnK | 45.55 | -78.64  | 12   | LC | McAndrews (1981)           |
| Frechencourt          | lcRKKBJ6j334zCND9v4 | 49.95 | 2.43    | 4.7  | LC | van Zeist (1980)           |
| Gallanech Beg         | lcRQz7vdye6CXMQO3SI | 56.38 | -5.5    | 14.5 | LC | Davies (1997)              |
| Gerry Lake            | lcRg0FX7kDsVlxAdcdh | 53.65 | -121.51 | 11.1 | LC | Gavin et al. (2009)        |
| Gitanga (Gi-2)        | WEB1392075b         | -3.7  | 29.77   | 12.9 | HH | Bonnefille (2000)          |
| Gladkoye Bog          | lcRTqdPXHTWaFMq3hMc | 55    | 83.33   | 11   | LC | Anderson (2002)            |
| Goat Lake             | lcRQ9mDBHfr9XBLQbUd | 60.26 | -149.91 | 9.2  | LC | Anderson et al. (2017)     |
| Gomishan              | lcRfkhpLwl5zDhzsObe | 37.15 | 54.06   | 10.8 | LC | Leroy (2013)               |
| Lake Gonghai          | WEBbc36fb7b         | 38.54 | 112.14  | 14.7 | HH | Ding et al. (2017)         |
| Goose Bay Marsh       | lcRlao41kuFDZ74153k | 44.35 | -75.87  | 8.2  | LC | Rippke et al. (2010)       |
| Gould Pond            | lcRpmbA744mctx0iYnT | 44.98 | -69.32  | 15.8 | LC | Jacobson Jr (1987)         |
| Grachen See           | lcRQNNj7W7IKng8MaOe | 46.2  | 7.84    | 9.3  | LC | Welten (1982)              |
| Graham Lake           | lcRCyUpvGwoKyOEvQkq | 45.18 | -77.35  | 13.9 | LC | Fuller (1995)              |
| Grande Briere         | lcRmOmrZ1GmmbIFM6W3 | 47.37 | -2.25   | 6.1  | LC | Visset (1979)              |
| Grant's Bog           | lcR811cflc7gPTWct5  | 49.79 | -125.13 | 14.1 | LC | Lacourse et al. (2019)     |
| Grasvatn              | lcRaZI95pzisAqfMKRi | 63.7  | 8.69    | 12.4 | LC | Moe (1996)                 |
| Grays Lake            | lcR89DqINtE3c8u2oBa | 43.07 | -111.44 | 21   | LC | Beiswenger (1987)          |
| Grey Islands          | lcRquihWeSVoCRQXYyT | 50.77 | -55.52  | 11.4 | LC | Evans (2002)               |
| Grosser Krebssee      | lcRCOiuJmrTNYijSm8z | 52.85 | 14.1    | 6.9  | LC | Jahns (1999)               |
| Grosser Krebssee      | lcRabb4phk9C2IJ0xj0 | 52.85 | 14.1    | 4.5  | LC | Jahns (1999)               |
| Gunnarsfjorden        | WEB09437cc2         | 71.04 | 28.17   | 9.2  | HH | Allen et al. (2007)        |
| Gur                   | lcRGzeoFV49AbtHJxKb | 53.03 | 51.84   | 21   | LC | Mokhova (2009)             |
| Gytgykai Lake         | lcRy7IhuBaQ6uF11NxS | 63.17 | 175     | 17.2 | LC | Anderson (2002)            |
| Hail Lake             | lcRzxniarU5TTRDhKkh | 60.03 | -129.02 | 11.8 | LC | Cwynar et al. (1995)       |
| Haircut Lake          | lcRjEweSTJryZAYGb1l | 60.52 | -133.21 | 7.4  | LC | Edwards et al. (2015)      |
| Halos I               | lcR9Wrg5WflyKPDn0gq | 39.16 | 22.84   | 7.8  | LC | Bottema (1988)             |
| Hams Lake             | lcREzhF3Ls6YkH3b9dK | 43.24 | -80.41  | 12.9 | LC | Bennett (1987)             |

|                           |                      |       |         |      |    |                            |
|---------------------------|----------------------|-------|---------|------|----|----------------------------|
| Heal Lake                 | WEB7ec5f35f          | 48.54 | -123.46 | 11.7 | HH | Brown et al. (2006)        |
| Heart Lake                | lcRQfllOAnlXiGk0QCz  | 44.18 | -73.97  | 12.5 | LC | Whitehead (1990)           |
| Hermit Lake               | lcRXLkyFOBBg5jAZeV9  | 38.09 | -105.63 | 13.8 | LC | Anderson et al. (2021)     |
| Lake Hidden               | WEBe3940424          | 29.81 | 92.54   | 12.1 | HH | Chen et al. (2020); (1999) |
| High Lake                 | lcRS0efHRT1BJR9ikbT  | 44.52 | -76.6   | 12.1 | LC | Fuller (1995)              |
| Hopschensee               | lcRP11grEDTPmBg8KEk  | 46.25 | 8.02    | 16   | LC | van der Knaap (2000)       |
| Hulun Lake                | LPDc4757948          | 49.13 | 117.5   | 11   | HH | Wen et al. (2010)          |
| Humber Pond 3             | lcR3bIWWhA552iIKLT1e | 43.64 | -79.48  | 4.4  | LC | Weninger et al. (1989)     |
| Hurecka slat              | lcR1ZBXuVhPXDI89DZT  | 49.15 | 13.33   | 12.8 | LC | Svobodova (2002)           |
| Iffigsee                  | lcRNGsv0Rdc2JExg4ck  | 46.39 | 7.41    | 11.3 | LC | Schworer (2015)            |
| Irvin Lake                | lcRu5pCMYC2GUPBBzdz  | 47.14 | -93.64  | 14.7 | LC | Alwin (1982)               |
| Jaslo                     | lcRRsJBLTTrGwZpaako  | 49.78 | 21.47   | 10.4 | LC | Harmata (1995)             |
| Jaunay                    | lcR7lkJf5CzFuBWMZTH  | 46.66 | -1.89   | 9.3  | LC | Joly (2006)                |
| Jay Lake                  | lcRJkBOXTs7gaPoBqC   | 46.23 | -89.28  | 10.4 | LC | Ewing (2000)               |
| Jiji (Ji-2)               | WEB1392075b-dup      | -3.92 | 29.67   | 10.9 | HH | Bonnefille (2000)          |
| Jingbo Lake               | lcRS3drKNxjECOBHubn  | 39.5  | 109.5   | 9.6  | LC | Li (2011)                  |
| Jones Lake                | lcRCHngCXxJyC7boD1V  | 49.45 | -99.29  | 11.3 | LC | Teed et al. (2009)         |
| Karas'e Lake              | lcREJxJv4v4Xe4w8NHU  | 49.37 | 75.4    | 6.3  | LC | Tarasov (1995)             |
| Karasye Lake              | lcR8mj67gLS492AwE9G  | 53.03 | 70.22   | 6.2  | LC | Tarasov (1994)             |
| Kayaks koye Zaimitschye   | lcRJSh0UMEWySvvTehJ  | 55    | 81      | 6.9  | LC | Anderson (2002)            |
| Kendegelukol Lake         | lcRKnkmvI3WSopJhUG5  | 50    | 137.05  | 16.3 | LC | Blyakharchuk (2004)        |
| Kinnshaugen               | lcRuxGl7M2jIBZRVX9   | 61.11 | 10.36   | 10.8 | LC | Birks (2012)               |
| Knob Hill Pond            | lcR7PMjhhOCJBCqpWw   | 44.36 | -72.37  | 14.1 | LC | Oswald et al. (2018)       |
| Komaritsa Peat Exposure   | lcR2i3W5G42BwI55d4z  | 57.5  | 69      | 10.4 | LC | Anderson (2002)            |
| Kotyrkol' Peat Bog        | lcR24ksEG9b6zeB53ZK  | 52.96 | 70.38   | 4.8  | LC | Tarasov (1992)             |
| Koycegiz Golu             | lcRY9JluMsRhPsnGrPq  | 36.88 | 28.64   | 5.2  | LC | van Zeist (1975)           |
| KR02                      | PYT4D9VTHOK          | 71.34 | -113.78 | 10.2 | HH | Peros et al. (2008)        |
| Kuruyange (Ku-1 and Ku-2) | WEBb6841ae1          | -3.58 | 29.68   | 21   | HH | Bonnefille (2000)          |
| Kuruyange (Ku-1 and Ku-2) | WEB4fba7605          | -3.58 | 29.68   | 12.8 | HH | Bonnefille (2000)          |
| Labsky dul                | lcRiW7mrxVo28FuA6iC  | 50.76 | 15.55   | 21   | LC | Engel (2010)               |
| Lac a Leonard             | lcRn8pfW2aOkGuGkhHo  | 49.21 | -65.81  | 10.7 | LC | Labelle et al. (1984)      |
| Lac a Sam                 | lcRxEJJeCcL9BE7yhk   | 46.65 | -72.98  | 11.2 | LC | no pub on record           |
| Lac aux Quenouilles       | lcRqZ63xorXscRkaQkU  | 46.17 | -74.4   | 13   | LC | Savoie et al. (1979)       |
| Lac Bastien               | lcRZEIQ110W378d9TOj  | 46.4  | -78.92  | 10.7 | LC | Bennett (1987)             |
| Lac Caribou               | lcRdtS17jfYKWCM0SIH  | 48.2  | -64.94  | 13.2 | LC | Jette et al. (1992)        |
| Lac Colin                 | lcR3VLvepAl8jPQ0Jap  | 46.72 | -70.3   | 13.2 | LC | Mott (1977)                |
| Lac de Bretaye            | lcRTAPYumbvCzcHXAOG  | 46.33 | 7.07    | 11.7 | LC | Thole (2016)               |
| Lac de Praver             | lcRUGwWEexWpwOLUIISO | 45.07 | 5.86    | 8.1  | LC | Nakagawa (1998)            |
| Lac des Grenouilles       | lcRKS9CEIDrCS6N9y5   | 44.1  | 7.48    | 8.2  | LC | Finsinger (2020)           |
| Lac des Roches Moutonnees | lcRxypeAN6trKSWT7tq  | 56.77 | -64.82  | 4.9  | LC | McAndrews et al. (1977)    |
| Lac du Lauzon             | lcROpAQxk5Ao0bN7OYy  | 44.68 | 5.79    | 7.2  | LC | Argant (2000)              |

|                                   |                     |       |         |      |    |                        |
|-----------------------------------|---------------------|-------|---------|------|----|------------------------|
| Lac Faribault                     | lcRbxTYXmaHDE2ZQHZ  | 58.87 | -71.72  | 6.6  | LC | Richard (1981)         |
| Lac Petel                         | lcR4Qzw6lCy4TeiU8MG | 50.55 | -66.27  | 8.7  | LC | King (1986)            |
| Lac Superieur de Fully            | lcRb4cZaToq9bd0pTUO | 46.18 | 7.09    | 11   | LC | Finsinger (2007)       |
| Lai Nair Schuls-Tarasp            | lcRMHuDYr4ooGY4YFQN | 46.78 | 10.28   | 15.7 | LC | Welten (1982)          |
| Lake 31                           | lcR8K3KbvN8GOh5iSkH | 67.05 | -50.47  | 5.2  | LC | Eisner et al. (1995)   |
| Lake Bayanchagan                  | lcRclYIyYQ8Kq5SvVWo | 41.63 | 115.23  | 11.5 | LC | Jiang (2010)           |
| Lake BI2                          | lcRU9Wv8xbnApq52K5R | 57.12 | -76.38  | 8.1  | LC | Gajewski et al. (1992) |
| Lake CH2                          | lcRvWx7hzKylZOr6Ue9 | 49.68 | -74.58  | 8.7  | LC | Garralla (1991)        |
| Lake Grinnell                     | lcRTFzF9IdSdplxVIsK | 41.1  | -74.64  | 16.8 | LC | Zhao et al. (2010)     |
| Lake Jake                         | lcRq6t1IHrB7zTbN9av | 63.67 | -65.15  | 9.7  | LC | Miller et al. (2005)   |
| Lake LB1                          | lcRJebEqyeZJeTWr9gD | 57.92 | -75.62  | 7.4  | LC | Gajewski et al. (1993) |
| Lake Solso                        | lcR6XGIZJJ6sUMOSpGg | 56.13 | 8.61    | 11.2 | LC | Odgaard (1988)         |
| Lake Solso                        | lcRonkgxC2OuZ5KhxOO | 56.13 | 8.61    | 6.8  | LC | Odgaard (1988)         |
| Lake Tianchi                      | lcRLUGwe6u9sNwCWBA0 | 25.87 | 99.28   | 18.5 | LC | Jiang (2019)           |
| Lake Varna                        | lcR1swPAuEHYu5rmwNE | 43.2  | 27.83   | 8    | LC | Bozilova (1994)        |
| Lake Voukaria                     | lcR92SM1LEHTVnz3T6Q | 38.87 | 20.83   | 10.2 | LC | Jahns (2005)           |
| Lake WA01                         | lcRBEvaydIFwOnSZuma | 61.24 | -136.93 | 10.5 | LC | Ravindra (2009)        |
| Larix laricina Site 5             | lcRz3iMAf5YXkq554az | 57.72 | -75.81  | 4.4  | LC | Peñalva et al. (1997)  |
| Lavau                             | lcRQLFkYUzyqFavzbXI | 47.34 | -1.93   | 6.5  | LC | Voeltzel (1987)        |
| Le Fourneau                       | lcRO66Hhb9HOPSTtGWS | 48.44 | -0.19   | 21   | LC | Barbier (2000)         |
| Le Gesvres                        | lcRzquIL84pflJdywy3 | 47.27 | -1.6    | 9.8  | LC | Ouguerram (2002)       |
| Lej da Champfer                   | lcRU88QgoMtobQ78a50 | 46.47 | 9.81    | 12.2 | LC | Gobet (2005)           |
| Le Marais de la Perge (South)     | lcRiPXC1QOIC1ugFpbT | 45.38 | -1.11   | 6.9  | LC | Diot (1995)            |
| Lembolovskoye lake                | lcRuBI86L2fbLUHGeuU | 60.36 | 30.31   | 12.9 | LC | Arslanov (2001)        |
| Lille Kjelavatn                   | lcRyQRzcvKdCEM16Z9h | 59.8  | 7.25    | 8.9  | LC | Birks (2007)           |
| Lily Lake                         | lcRPCIzys1FJAv11nWi | 59.2  | -135.4  | 12.6 | LC | Cwynar (1990)          |
| Lily Lake                         | lcRjUN7lrKnYMS1DSr3 | 47.91 | -89.09  | 9.6  | LC | Cwynar (1990)          |
| Lily Lake                         | lcROBIER3oUzr1eINaV | 41.98 | -120.21 | 11.7 | LC | Cwynar (1990)          |
| Litvatnet                         | lcRukEb6BnbJCwvGQcS | 68.53 | 14.93   | 12.6 | LC | Bjune (2009)           |
| Little Cheyne Court Walland marsh | lcRyc8tsEYpBLQv53H9 | 50.96 | 0.83    | 4.6  | LC | Waller (1999)          |
| Little Swift Lake                 | lcRUFhLpJJEIgfJy1fm | 60.22 | -159.77 | 12.8 | LC | Axford et al. (2004)   |
| Little Willey Pond                | lcRMPkP0JPngepqKt5J | 43.29 | -71.18  | 13.2 | LC | Oswald et al. (2018)   |
| Loch a'Chroisg                    | lcR1zcvlTpHe7Gu2Ozc | 57.57 | -5.14   | 4.3  | LC | Pennington (1973)      |
| Loch Cleat                        | lcRJ5gQAZ1C6slQ2wzM | 57.62 | -6.28   | 12.1 | LC | Birks (1983)           |
| Logne                             | lcRsKj7HRaEa8Csoe9n | 47.33 | -1.5    | 4.8  | LC | Barbier (1997)         |
| Lone Fox Lake                     | lcRGoh2qGUcOrSpCnQ  | 56.72 | -119.72 | 12.3 | LC | MacDonald (1984)       |
| Long Breach                       | lcR2gzCRTzbPXSErk7O | 51.07 | -3.69   | 6.6  | LC | Fyfe (2003)            |
| Long Lake                         | lcRZkWC1fAUMWFcopmS | 41.5  | -106.37 | 13.3 | LC | Carter et al. (2017)   |
| Longquan Lake LC2                 | lcRCl2bFYEi8iJDZ3pT | 31.08 | 112.24  | 21   | LC | Liu (1991)             |
| Loon Pond                         | lcRtljGbgEMRexcyRwF | 45.03 | -68.2   | 14.7 | LC | no pub on record       |
| Lorraine Lake                     | lcRi9DLyVlptYxuLt   | 46.14 | -86.48  | 9.8  | LC | Calcote (2003)         |

|                              |                                |       |         |      |    |                                             |
|------------------------------|--------------------------------|-------|---------|------|----|---------------------------------------------|
| Lough Mullaghlahan           | lcRShwFkjy6CGJ3eBei            | 54.78 | -8.47   | 14.6 | LC | Fossitt (1994)                              |
| Luganskoe                    | lcRCHep7xkq0keh2M2L            | 43.72 | 40.7    | 6    | LC | Efremov (1995)                              |
| Lukaschin Yar Peat Exposure  | lcR6zfg40KfwrtKMP1E            | 61    | 78.5    | 11.7 | LC | Anderson (2002)                             |
| Mallard Pond                 | lcRtxJO058HFi2LTuPf            | 51.29 | -101.32 | 8.6  | LC | Teed et al. (2009)                          |
| Mansell Pond                 | lcRsGKE1HtShd5fiLfc            | 45.04 | -68.73  | 10   | LC | Almquist-Jacobson et al. (1995)             |
| Marais de Keswick            | lcR05uuYvKoZnUNKOyb            | 44.2  | -79.51  | 4.4  | LC | Dinel et al. (1986)                         |
| Marais de Lisle              | lcRws8UtuiI7583vk4v            | 47.43 | -1.49   | 6.2  | LC | Ouguerram (2002)                            |
| Marcella Lake                | lcRTMSt7gELRNtYcNb3            | 60.07 | -133.81 | 9.1  | LC | Edwards et al. (2015)                       |
| Masatjornet                  | lcR8fc8B2pDMdMUjVUf            | 61.56 | 10.27   | 13   | LC | Birks (2012)                                |
| Miancheng M1                 | lcRXvbC4hazRnHK1FGt            | 30.18 | 113.22  | 11.4 | LC | Yang (1998)                                 |
| Mica Lake                    | lcR51PFKIQqno4VsZWI            | 60.69 | -148.14 | 10.2 | LC | Anderson et al. (2017)                      |
| Mission Cross Bog            | lcRrhd8mGjgTgCwlu9             | 41.78 | -115.48 | 9.8  | LC | Thompson (1984)                             |
| Mohawk Pond                  | lcRgMVsdDQMDFsI82dW            | 41.81 | -73.29  | 18.7 | LC | Gaudreau (1986)                             |
| Mono Lake                    | lcRf9gq05AeCrcXDAIG            | 38.01 | -119.03 | 13.2 | LC | Davis (1999)                                |
| Mont Carre Heremence         | lcRII10DdZhuZLCfO81            | 46.15 | 7.37    | 8.2  | LC | Welten (1982)                               |
| Moon Lake                    | lcR3ODiGvRodeMTGOjO            | 46.86 | -98.16  | 13.8 | LC | Laird (1996)                                |
| Morttjern                    | lcR9d3tUR71Zym2GxwZ            | 59.06 | 11.62   | 11.5 | LC | Birks (2012)                                |
| Motta Naluns                 | lcRgDGHB8seTJysUnfr            | 46.81 | 10.26   | 11   | LC | van der Knaap (1997)                        |
| Mrtvy luh                    | lcRQwutEsOeqKYYHxvG            | 48.87 | 13.88   | 6.4  | LC | Svobodova (2001)                            |
| Mshinskoye raised bog        | lcRURPnnXHhtNCJhPrL            | 59.01 | 29.98   | 11.6 | LC | Arslanov (2001)                             |
| Myshetskoe-Dolgoe            | lcR85IhuFYet9fVBJm1            | 56.07 | 37.33   | 14.8 | LC | Kremenetski (2000)                          |
| Natla Bog                    | lcRQaFKDkPHIf6LdubV            | 63.02 | -128.8  | 10.1 | LC | MacDonald (1983)                            |
| Nelson Lake                  | lcR2ADpVvLUJQ0bZHQZ            | 46.23 | -85.38  | 7.8  | LC | Delcourt et al. (2002)                      |
| Newark Valley Pond           | lcRFg61loqbAXRktuir            | 39.67 | -115.77 | 21   | LC | Mensing et al. (2008)                       |
| Nizhnevartovsk               | lcRHrOMi2BPU2oeX6XI            | 62    | 76.67   | 12.4 | LC | no pub on record                            |
| No Bottom Lake               | GH8d2bed43                     | 41.28 | -70.11  | 11   | HH | Marsicek et al. (2013);<br>Dunwiddie (2013) |
| Northeast Shark River Slough | lcR6YXnNeDv2fjyHQ0H            | 25.75 | -80.58  | 5.1  | LC | Glaser et al. (2013)                        |
| Novoalex peatland            | lcRM94MG6etHseLCjV6            | 55.12 | 41.04   | 8.1  | LC | Novenko (2016)                              |
| Novo-Uspenka                 | lcRLulYb48KtEkGIREq            | 56.62 | 84.17   | 6    | LC | Blyakharchuk (1989)                         |
| Nutt Lake                    | lcRD3uw2NlnVEYyVEDB            | 45.22 | -79.45  | 11.1 | LC | Bennett (1987)                              |
| Old Field                    | lcReP7TW9LscM4pX9SP            | 37.12 | -89.83  | 5.6  | LC | King (1981)                                 |
| Ospitale                     | lcR3bsuKx5tY1eHYdiF            | 44.16 | 10.78   | 5.9  | LC | Watson (1996)                               |
| Over Gunnarsfjorden          | lcRPMFjnjsyrThm2wUI            | 71.04 | 28.17   | 13.2 | LC | Allen (2007)                                |
| Oygardstjonn                 | lcRNCuYpM1BbEmsE2Jo            | 59.63 | 7.99    | 11.8 | LC | Birks (2007)                                |
| Ozerki                       | lcR6LYfIRIUVSNa84H             | 50.42 | 80.47   | 14.3 | LC | Tarasov (1994)                              |
| Padul Lake                   | WEB-c8f6e-2665-4cfa-846a-481f4 | 37.01 | -3.6    | 21   | HH | Camuera et al. (2022)                       |
| Padul Lake                   | WEB-9a7cd-c928-4876-9177-0f783 | 37.01 | -3.6    | 21   | HH | Camuera et al. (2022)                       |
| Padul Lake                   | WEB-a01b8-a050-4ceb-b3c1-e41a3 | 37.01 | -3.6    | 21   | HH | Camuera et al. (2022)                       |
| Paidre                       | lcRo2OfrT0Gm5uCDb8             | 58.28 | 25.5    | 7.3  | LC | Saarse (1995)                               |

|                               |                     |       |         |      |    |                                 |
|-------------------------------|---------------------|-------|---------|------|----|---------------------------------|
| Pannel Bridge                 | lcRvvlSZxS9bXTLaFfY | 50.91 | 0.68    | 11.4 | LC | Waller (1987)                   |
| Pashennoe                     | lcR9TrdUideka9MU4fK | 49.37 | 75.4    | 10.8 | LC | Tarasov (1994)                  |
| Pavullo nel Frignano          | lcRDPE8R2Ll9LGh8P0b | 44.32 | 10.84   | 15.3 | LC | Vescovi (2010)                  |
| Penegor Lake                  | lcRKSAUVxPgaePuZst2 | 46.62 | -88.86  | 9.7  | LC | Calcote (2003)                  |
| Perch Lake                    | lcRyOxxsKid1XcvzymT | 51.65 | -100.9  | 6.1  | LC | no pub on record                |
| Pillon Gsteig-Diablerets      | lcRAwlfFkCrGR9UHhR0 | 46.36 | 7.2     | 11.8 | LC | van der Knaap (1997)            |
| Pixie Lake                    | WEB69d58fa4         | 48.6  | -124.2  | 12   | HH | Brown et al. (2006)             |
| Point Escuminac               | lcRLarbP2pT7p0Kh393 | 47.08 | -64.8   | 12.8 | LC | Warner et al. (1991)            |
| Poland Spring Pond            | lcRuSyi5hCNJTteCp9X | 44.03 | -70.35  | 15.1 | LC | no pub on record                |
| Pos'yet Bay                   | lcRSIAYzn1UZ8xPJ3S8 | 42.63 | 130.8   | 9.5  | LC | Anderson (2002)                 |
| Pretty Lake                   | lcRPJLde7kvEsaM11zp | 41.58 | -85.25  | 15.3 | LC | Williams (1974)                 |
| Pur-Taz Peatland              | lcRhVCufS09bBzCcMnH | 66.7  | 79.73   | 5.6  | LC | Peteet (1998)                   |
| Pye Lake                      | lcR5p1vTbyYhjbhn154 | 44.98 | -62.09  | 14.1 | LC | Mott et al. (2009)              |
| Qindeli                       | lcRidlzjKtSWUMIPMg0 | 47.88 | 133.67  | 13.6 | LC | Xia (1988)                      |
| Qinghai Lake                  | WEB6d14587e         | 36.67 | 100.58  | 12.1 | HH | Chen et al. (2020); (2002)      |
| Qongjiamong Lake              | WEBa860e0be         | 29.81 | 92.37   | 12.1 | HH | Chen et al. (2020); (2003)      |
| Ranger Lake                   | PYTCYF0YQTU         | 67.15 | -153.65 | 21   | HH | Brubaker et al. (1983)          |
| Ratasjoen                     | lcRJaPYXhPFpzwSAIk6 | 62.27 | 9.83    | 11.5 | LC | Velle (2005)                    |
| Redrock Lake                  | lcRqNrP3cF8Okd3KGC3 | 40.08 | -105.54 | 11.4 | LC | Maher Jr (1973)                 |
| Regetovka                     | lcRXldXWx5funOLzL9u | 49.42 | 21.28   | 9.9  | LC | Wacnik (1995)                   |
| Reidel Lake                   | lcR6BJfRZckOtBFbZP  | 46.21 | -95.28  | 13.1 | LC | Almquist-Jacobson et al. (1992) |
| Reiersdalvann                 | lcRlvs0Q0rvv2CWcbWs | 58.33 | 7.79    | 10.9 | LC | Birks (2007)                    |
| Rhamnus Lake                  | WEB4581c605         | 48.63 | -123.72 | 11.1 | HH | Brown et al. (2006)             |
| Rice Lake                     | lcRSsAlzeDWcvyVipb6 | 48.01 | -101.54 | 10.6 | LC | no pub on record                |
| Rice Lake                     | lcRaqtKYUpeVFmXJnVU | 44.2  | -78.14  | 5.7  | LC | McAndrews (1969)                |
| Ridge and Slough (02-05-21-5) | lcRtm2nqesiKFqeqhXe | 25.83 | -80.77  | 4.2  | LC | Bernhardt et al. (2009)         |
| Riviere-aux-Feuilles 2        | lcRfnxvvcGEBTBvKcZk | 58.22 | -71.95  | 6.1  | LC | no pub on record                |
| Rogers Lake                   | GH6d568132          | 41.21 | -72.17  | 11   | HH | Marsicek et al. (2013)          |
| Rogers Lake                   | lcRqQrMGXxoorseV4cP | 41.35 | -72.3   | 17.8 | LC | Davis (1967)                    |
| Ruppert Lake                  | lcRLjFgm2COLZCD5g59 | 67.07 | -154.23 | 15   | LC | Brubaker et al. (1983)          |
| Ruppert Lake                  | lcRITy31dNFpYMrrFH7 | 67.07 | -154.24 | 14.2 | LC | Brubaker et al. (1983)          |
| Rusaka (Ru-1 and Ru-3)        | WEBa1c23512         | -3.43 | 29.62   | 9.2  | HH | Bonnefille (2000)               |
| Rusaka (Ru-1 and Ru-3)        | WEB8ffcaee7         | -3.43 | 29.62   | 21   | HH | Bonnefille (2000)               |
| Rutz Lake                     | lcRWHzMmVYYcDf6K32p | 44.87 | -93.86  | 13.1 | LC | Stuiver (1975)                  |
| Ryerse Lake                   | lcRiq1prtqFDpKinLF2 | 46.13 | -85.18  | 10   | LC | no pub on record                |
| Sa Curcurica                  | lcRoGFzRew9WTAeknaI | 40.46 | 9.79    | 8.3  | LC | Beffa (2016)                    |
| Saksunarvatn                  | lcREQ7puGij4dGVajz  | 62.24 | -7.16   | 8.9  | LC | Johansen (1982)                 |
| Salada Pequena                | lcRNeTKafVV1Glibo2e | 41.03 | -0.22   | 4.8  | LC | no pub on record                |
| Salmo Lake                    | lcRti96IuQQTbmLrU3C | 60.45 | -133.56 | 11.5 | LC | Edwards et al. (2015)           |
| Sandvikvatn                   | lcRUiZGHArjNxAiW1nX | 59.28 | 5.49    | 9.6  | LC | Paus (1982)                     |
| San Joaquin Marsh             | lcR3h58B1xMNHkPYwiY | 33.66 | -117.86 | 8.8  | LC | Davis (1992)                    |



|                                       |                     |       |         |      |    |                              |
|---------------------------------------|---------------------|-------|---------|------|----|------------------------------|
| Schoodic Peninsula Hollow             | lcRKhWUhubcIA6KVzZ9 | 44.37 | -68.07  | 8    | LC | Schauffler (1998)            |
| Secret Valley Marsh                   | lcRVjgMr8niCWzIOTrs | 40.57 | -120.27 | 11.1 | LC | West (2002)                  |
| Selin Lake                            | WEBdd4fa361         | 31.65 | 89.14   | 12.1 | HH | Chen et al. (1993); (2020)   |
| Selitkan-1 Exposure                   | lcRKWdAzk5gaaCCDOMh | 53.22 | 135.05  | 7.9  | LC | Anderson (2002)              |
| Seven Lakes                           | lcRIQnhC5noD5c3isF7 | 40.9  | -106.68 | 4.2  | LC | Calder (2016)                |
| Sharkey Lake                          | lcR5SRLpHOGiAs4Q4SW | 44.59 | -93.41  | 11.4 | LC | Camill et al. (2003)         |
| Sihailongwan Maar                     | LPD6fdee25b         | 42.28 | 126.6   | 11.8 | HH | Stebich et al. (2015)        |
| Simplon/Gampisch-Alter Spittel        | lcRnhx0TV2RqvrweSW7 | 46.23 | 8.01    | 11.6 | LC | van der Knaap (1997)         |
| South Rhody peatland                  | lcRwZudUZIMj01vQXF2 | 46.57 | -86.08  | 10.5 | LC | Booth et al. (2004)          |
| Spicer Lake                           | lcRwnVuzjxKgcJQwS8I | 41.76 | -86.52  | 15.2 | LC | Wang et al. (2016)           |
| Spirit Lake                           | lcR1KT6GyUTH14Ybu8w | 46.47 | -86.96  | 14.1 | LC | Woods et al. (1989)          |
| Spruce Pond                           | lcRgKkHN0CyyYoGbYOA | 41.24 | -74.18  | 17.1 | LC | Maenza-Gmelch (1997)         |
| Stages Pond                           | lcRzbcPN2Y2gyo9iwZ9 | 39.67 | -82.94  | 4.2  | LC | Snyder (1991)                |
| Staroselsky Moch                      | lcRaesu0dd88X29ftJX | 56.29 | 32.03   | 13.5 | LC | Novenko (2009)               |
| Steeremoos                            | lcR6T9nRWTcVYluBUZX | 47.81 | 8.2     | 8.9  | LC | Rosch (2000)                 |
| Stewart Bog                           | lcR5PWLIIIWSTWJrKGG | 35.83 | -105.72 | 14.2 | LC | Jimenez-Moreno et al. (2008) |
| Storsandvatnet                        | lcRsxQJCal75WkUpI5m | 63.46 | 8.45    | 14.3 | LC | Birks (2012)                 |
| Straldzha mire                        | lcR0aDYyLrxCMKEkXI7 | 42.63 | 26.78   | 21   | LC | Tonkov (2009)                |
| Straldzha mire                        | lcRyf5ECfdUuscy1RT4 | 42.63 | 26.78   | 4.5  | LC | Tonkov (2009)                |
| Styggjtjarnen                         | lcR4I0L8xuHdT39hQR  | 62.32 | 13.56   | 9.3  | LC | Giesecke (2005)              |
| Sudoble Lake                          | lcRYR1SVCS4MImdG6Hg | 54.03 | 28.1    | 13.5 | LC | Elovicheva (1985)            |
| Svartvatnet                           | lcRKJqcToTVwvmD59ym | 63.35 | 8.88    | 14   | LC | Birks (2012)                 |
| Svatoborice-Mistrin                   | lcRyY8us0XnFvI0iGrN | 48.94 | 17.07   | 8.3  | LC | Svobodova (1989)             |
| Svencele Bog                          | lcRaRjP3JKMmyWbjhW3 | 55.5  | 21.29   | 7.4  | LC | no pub on record             |
| Swampbuggy Lake                       | lcRRMCoTqUxIBPKGqtp | 63.05 | -147.42 | 8.2  | LC | Rohr (2001)                  |
| Tangle Lakes                          | lcR4bKnn7hrqLKgZGr3 | 63.03 | -146.06 | 5.4  | LC | Ager et al. (1981)           |
| Taul Zanogutii                        | lcRLTwUkmqSqLkVpHAA | 45.33 | 22.8    | 15.4 | LC | Farcas (1999)                |
| Taylor Lake                           | lcRdS5DDFepoNkFmck3 | 46.1  | -123.91 | 4.8  | LC | Long et al. (2002)           |
| Tianchi Lake                          | lcRdGds9oOLVuJWyouN | 35.26 | 106.31  | 6    | LC | Sun (2011)                   |
| Tiavatnet                             | lcR5yi0K8vaJ1pDMGjM | 63.06 | 9.42    | 12.6 | LC | Birks (2012)                 |
| Tioga Pass Pond                       | lcR87uwkt1JVspUAXqa | 37.91 | -119.26 | 10.5 | LC | Anderson (1987)              |
| Tlsta hora                            | lcRtqapfWIGeedhj31W | 48.89 | 17.89   | 4.6  | LC | Rybnickova (2005)            |
| Tom' River Peat                       | lcRWjXOvOXsBSuCZKoz | 56.17 | 84      | 10.2 | LC | Anderson (2002)              |
| Tourbiere Caribou                     | lcRK61Zqovd5AsakNEX | 47.64 | -71.24  | 4.3  | LC | Richard (1977)               |
| Tourbiere de la Lande                 | lcRZgqRfWdWqj1fNgxF | 43.57 | 2.97    | 5.2  | LC | Pulido (2006)                |
| Tourbiere de Lanoraie<br>COTEAU JAUNE | lcR1A1e4eCK8RCZbrM1 | 45.96 | -73.34  | 8.2  | LC | Comtois (1982)               |
| Tourbiere de Lanoraie<br>STJEAN       | lcROauZ0E6EMlPlEs8f | 46    | -73.22  | 6    | LC | Comtois (1979)               |
| Tourbiere de Parçay-sur-Vienne        | lcRcR80wTm1A4RAUIRb | 47.09 | 0.48    | 12.3 | LC | Cyprien (2006)               |
| Tourbiere du Peschio                  | lcRw42ai03YAwd4En3b | 44.45 | 3.6     | 5.8  | LC | Pulido (2006)                |
| Trettetjorn                           | lcR5MPWfK6sspyzNqi4 | 60.72 | 7       | 13.2 | LC | Bjune (2005)                 |

|                                                     |                     |       |         |      |    |                                                |
|-----------------------------------------------------|---------------------|-------|---------|------|----|------------------------------------------------|
| Troarn Saint-Samson                                 | lcRu4yXp3wwLjp0Lsnb | 49.18 | -0.17   | 5    | LC | Lespez (2010)                                  |
| Troarn Saint-Samson                                 | lcR7lnczhWShBzFx9   | 49.18 | -0.17   | 4.2  | LC | Lespez (2010)                                  |
| Tschokljovo Marsh                                   | lcRscdnEDYcOz51Mjsk | 42.37 | 22.83   | 8    | LC | Bozilova (1985)                                |
| TsoMoriri                                           | GH2b8af51c          | 32.93 | 78.32   | 12   | HH | Leipe et al. (2014)                            |
| Tsuolbmajavri                                       | PYTJINRZ45D         | 68.41 | 22.05   | 9    | HH | Korhola et al. (2002)                          |
| Uncle Seth's Pond                                   | lcRNlfrkkQn5Ce0M7QR | 41.43 | -70.66  | 13.3 | LC | Oswald et al. (2018)                           |
| Vallon de Provence                                  | lcRwuWJUSPd5BtSkfF  | 44.39 | 6.4     | 8.9  | LC | de Beaulieu (1977)                             |
| Vallon de Provence                                  | lcRtoAUZCUcuHH7pJF4 | 44.39 | 6.4     | 9    | LC | de Beaulieu (1977)                             |
| Vechernii River                                     | lcR4HXbcw98F8bYyA5X | 63.28 | 147.75  | 7.2  | LC | Anderson (2002)                                |
| Velky Ded                                           | lcR3Q9kRsZeRDvtgrkj | 50.08 | 17.22   | 5.4  | LC | Rybnicek (2004)                                |
| Vestre Oykjamyrjtjom                                | lcRr3el7cqYBPpIQz54 | 59.82 | 6       | 13.3 | LC | Bjune (2005)                                   |
| Vishnevskoe Lake                                    | lcR8NnFIKKERYjVtdoJ | 60.5  | 29.52   | 14.7 | LC | Arslanov (1999)                                |
| Wallbach Lenk                                       | lcRiJpSfk6qHogZUTSv | 46.43 | 7.4     | 13.4 | LC | van der Knaap (1997)                           |
| Wangjiadian profile                                 | lcRpkRKA2Q4Uru9VFWq | 36.16 | 114.67  | 15   | LC | Cao (2010)                                     |
| Waschhorn                                           | lcRLZA5oyAihPeZFLb7 | 53.62 | 8.74    | 7.9  | LC | Kuhl (1998)                                    |
| Water Conservation Area 3B,<br>Gumbo Limbo Far Tail | lcRCCeOBvoY6ibTb3Lr | 25.77 | -80.51  | 5    | LC | Willard et al. (2001)                          |
| Watten                                              | lcRgSd7F3XOo7P6g0F0 | 50.83 | 2.21    | 4.3  | LC | Gandouin (2002)                                |
| Wenquan wetland                                     | lcR13jshNz5dqXWSsRh | 44.97 | 81.03   | 10.3 | LC | Li (2020)                                      |
| West Okoboji Lake                                   | lcRbTXcl79CR4gJxaFC | 43.33 | -95.2   | 17.6 | LC | Van Zant (1979)                                |
| West Olaf Lake                                      | lcRDRHpPMtQHS2p3qME | 46.6  | -96.19  | 8.8  | LC | Nelson et al. (2008)                           |
| West Side Pond                                      | lcRT2tIa25Tm8EVwMwr | 41.85 | -73.26  | 13   | LC | Lacourse et al. (2005)                         |
| Wiggenhall St. Germans                              | lcRbLUSpdmvr6eTifaD | 52.69 | 0.34    | 5.2  | LC | Waller (1994)                                  |
| Windmill Lake                                       | lcRw0soaBrKg4z1ACYN | 63.66 | -148.81 | 16.4 | LC | Bigelow (1997)                                 |
| Winneconnet Pond                                    | lcRqcv7HT215BsuiBp5 | 41.97 | -71.12  | 16.6 | LC | Suter (1985)                                   |
| Wolsfeld Lake                                       | lcRopIDpnZtAWYZM2E4 | 45.01 | -93.57  | 13.4 | LC | Grimm (1981)                                   |
| Woryty                                              | lcR1N0S6oyvXMQEpB94 | 53.75 | 20.21   | 13.4 | LC | Ciesla (1977)                                  |
| Woryty                                              | lcRgNEo7t886ISDFpMs | 53.75 | 20.21   | 11.7 | LC | Ciesla (1977)                                  |
| Yabitsuyachi                                        | lcRnpyqRGt7A1AQgJZI | 40.62 | 140.9   | 8.2  | LC | Morita (1987)                                  |
| Yakumo                                              | LPD72217804         | 42.28 | 140.26  | 5.5  | HH | Leipe et al. (2013)                            |
| Zalozhtsy                                           | lcRx8TPoWqgtzHDb9wM | 49.75 | 25.45   | 9.7  | LC | Artyushenko (1982)                             |
| Zaruckoe                                            | lcRWLl959HwYAt7u0IE | 63.9  | 36.25   | 9.4  | LC | Elina (1981)                                   |
| Zigetang Lake                                       | WEB94c7839d         | 32    | 90.9    | 12.1 | HH | Herzschuh et al. (2006);<br>Chen et al. (2020) |

**Table S3: R and  $w_{loc}$  sensitivity experiments. Mean reconstruction correlation coefficients are listed for experiments which use a variety of combinations of the  $w_{loc}$  (localization) and R uncertainty parameters. Values are similar to the skill metrics shown in Fig. 5 and Fig. S4 which use an R of 10 and  $w_{loc}$  of 8,000. For this table, the assimilation was performed with only 5 iterations for computational efficiency.**

|              |        | lake status<br>(global mean correlation coefficient)          |      |      |
|--------------|--------|---------------------------------------------------------------|------|------|
|              |        | assigned uncertainty (percentile)                             |      |      |
|              |        | 10                                                            | 30   | 50   |
| localization | 10,000 | 0.37                                                          | 0.37 | 0.37 |
| radius (km)  | 8,000  | 0.33                                                          | 0.33 | 0.33 |
|              | 6,000  | 0.26                                                          | 0.26 | 0.26 |
|              |        | precipitation<br>(global mean correlation coefficient)        |      |      |
|              |        | assigned uncertainty (percentile)                             |      |      |
|              |        | 10                                                            | 30   | 50   |
| localization | 10,000 | 0.34                                                          | 0.34 | 0.34 |
| radius (km)  | 8,000  | 0.39                                                          | 0.39 | 0.39 |
|              | 6,000  | 0.41                                                          | 0.41 | 0.41 |
|              |        | precipitation<br>(North America mean correlation coefficient) |      |      |
|              |        | assigned uncertainty (percentile)                             |      |      |
|              |        | 10                                                            | 30   | 50   |
| localization | 10,000 | 0.42                                                          | 0.42 | 0.42 |
| radius (km)  | 8,000  | 0.47                                                          | 0.47 | 0.47 |
|              | 6,000  | 0.46                                                          | 0.46 | 0.46 |

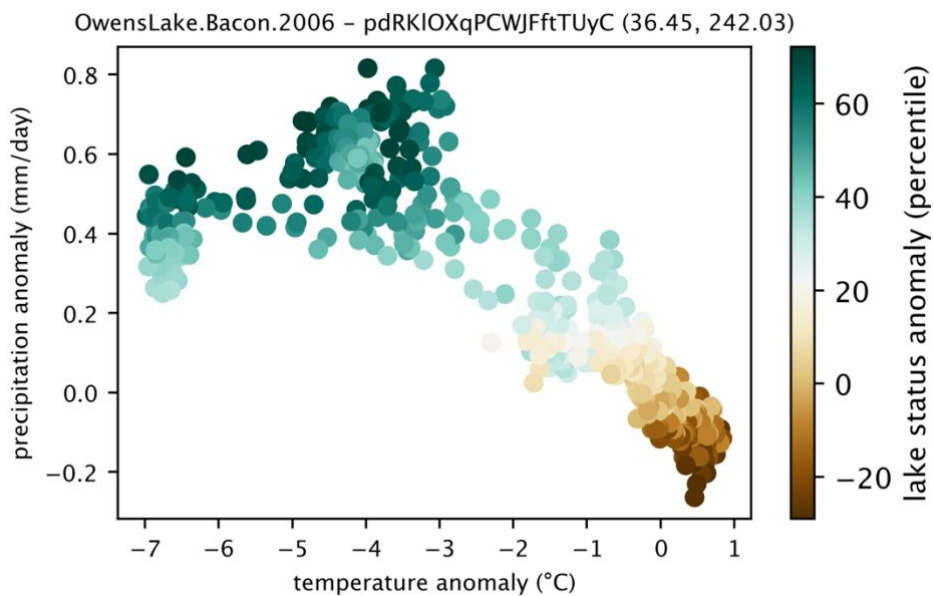

60

**Figure S1: Representative relationship between temperature, precipitation, and lake status. Temperature (x axis) and precipitation (y axis) values are plotted from the model prior grid cell nearest to the Owens Lake proxy record located in the US Southwest. Colors indicate the calculated lake status value corresponding to each climate state. Dark green colors in the top left indicate high lake status values when temperature is colder and precipitation is higher. All values are plotted as anomalies relative to the 11.7–0 mean.**

65

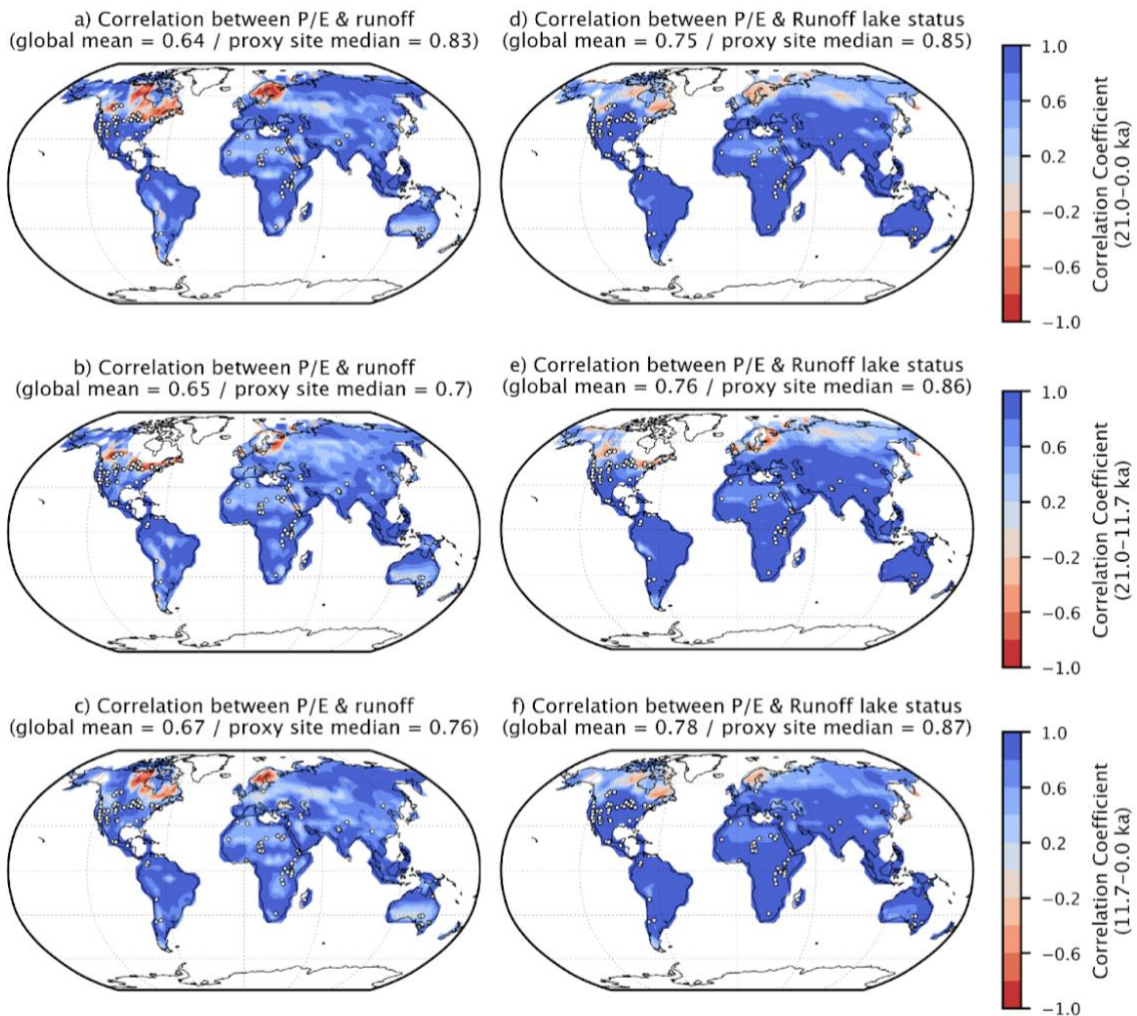

70 **Figure S2: Correlation between runoff and P/E values in TraCE. (a-c) Pearson's correlation coefficients between the two variables are plotted for each grid cell. (d-f) Lake status values were also calculated using P/E and runoff as the numerator of the lake status equation to evaluate the impact of this substitution on the PSM. Correlations were calculated for the entire time series (a,d; 0-21 ka) as well the deglacial (b,e; 21-11.7 ka) and Holocene (c,f; 11.7-0 ka).**

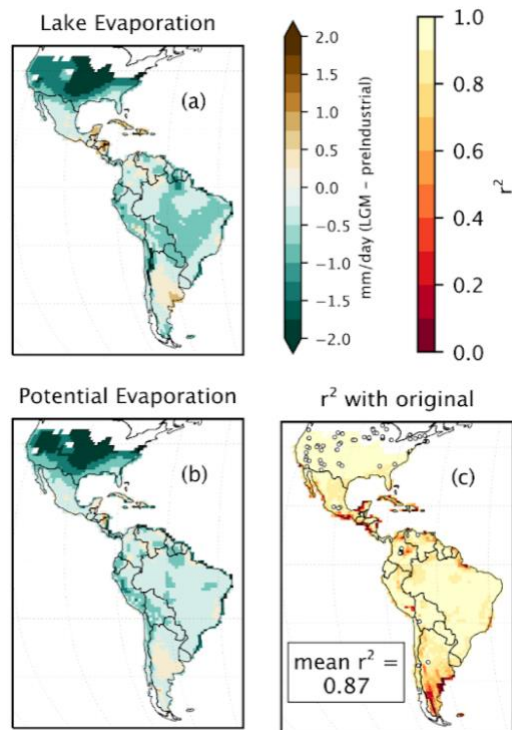

75

Figure S3: Comparison of lake evaporation methods. Similar to Fig. 4 except that a comparison between lake evaporation and potential evaporation is shown rather than lake status. (a) lake evaporation values calculated by Lowry and Morrill (2019). (b) is the potential evaporation values calculated for this study. Both panels a and b show the mean LGM value subtracted by the mean preindustrial value. (c)  $r^2$  value for each grid cell using the combined 200 year time series.

80

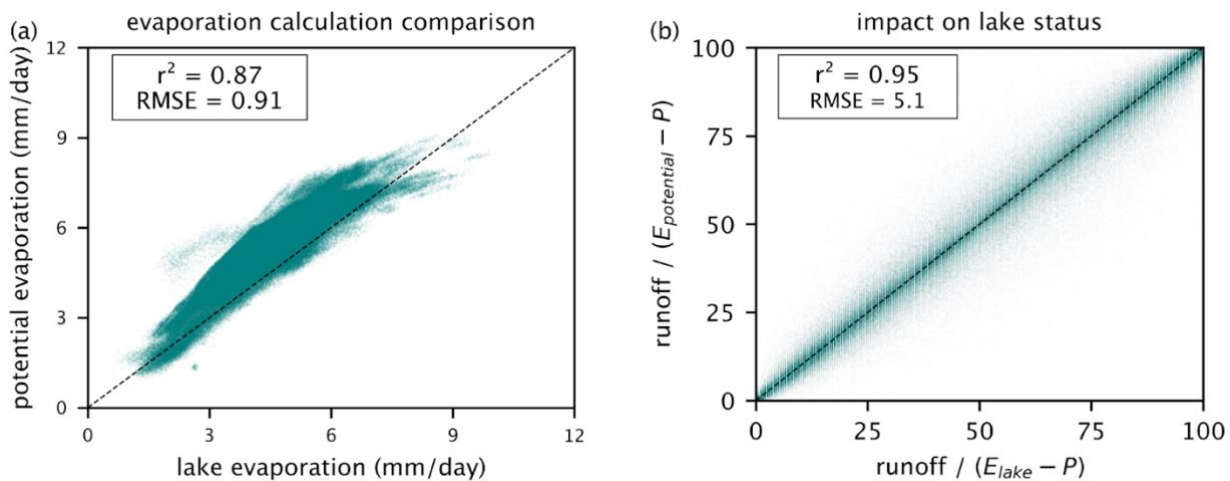

85 **Figure S4: Scatter plot comparing the similarity of lake status PSM calculations. (a) Evaporation values used to create Fig. S3c. (b) impact of modifications to the lake status equation (y axis) relative to the use of runoff and lake evaporation calculated by Lowry and Morrill (2019; x axis). These values are also plotted spatially in Fig. 4. The dashed 1:1 line indicates hypothetical perfect agreement for comparison.**

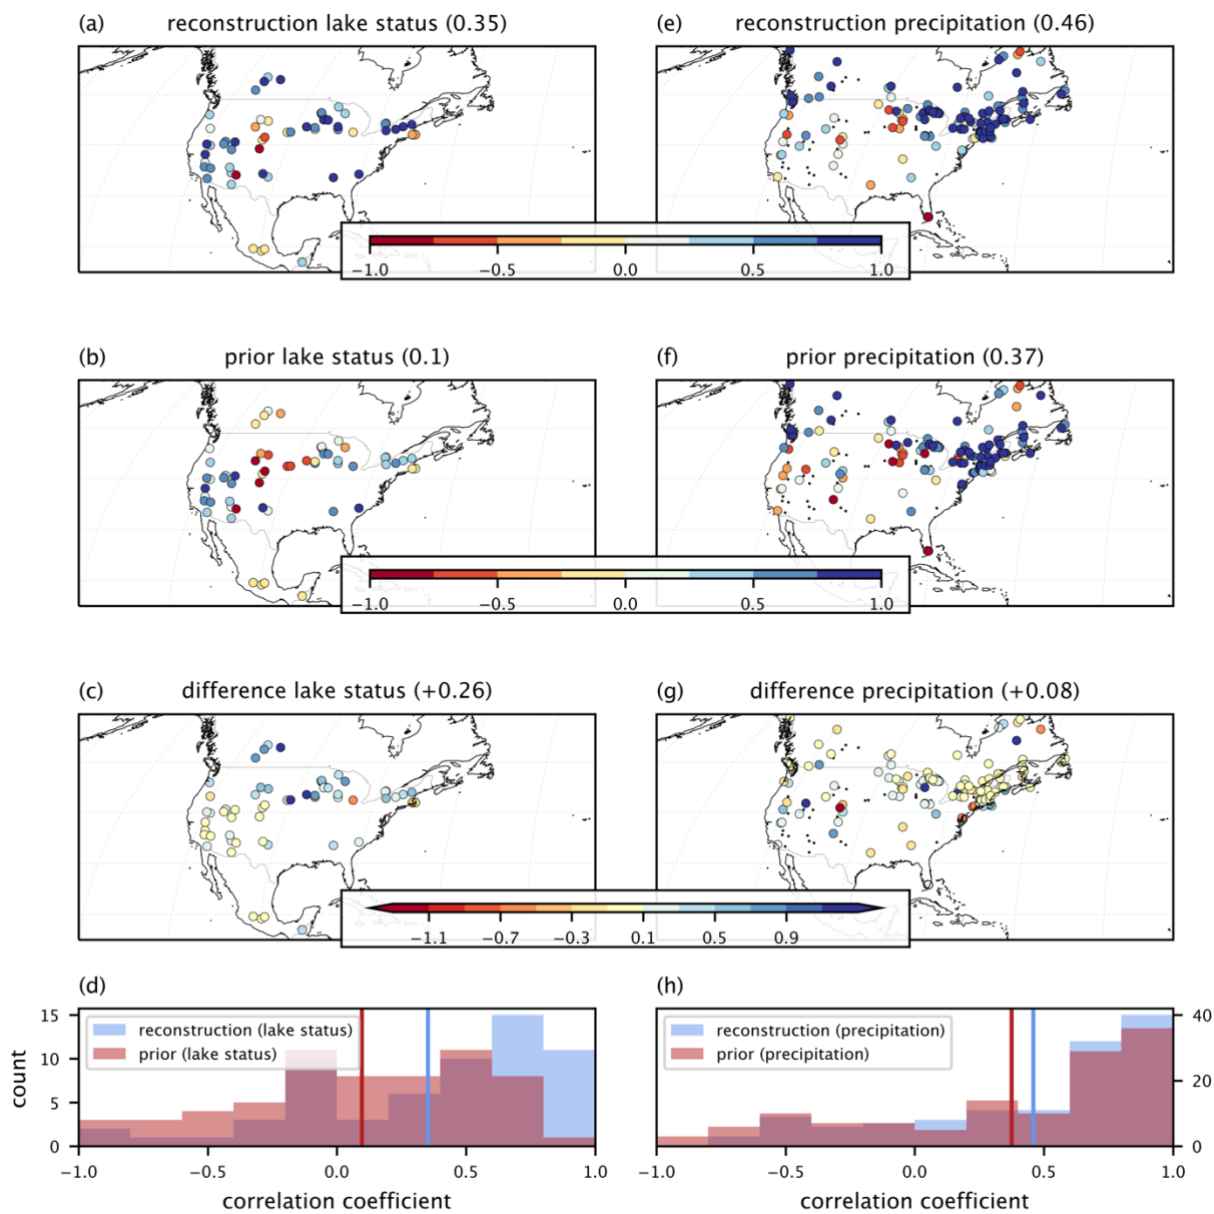

90 **Figure S5: Validation statistics for North America. Similar to Fig. 5 but only Pearson's correlation coefficients for the North America region are shown. This is the one region with numerous proxy records for both lake status and calibrated precipitation.**



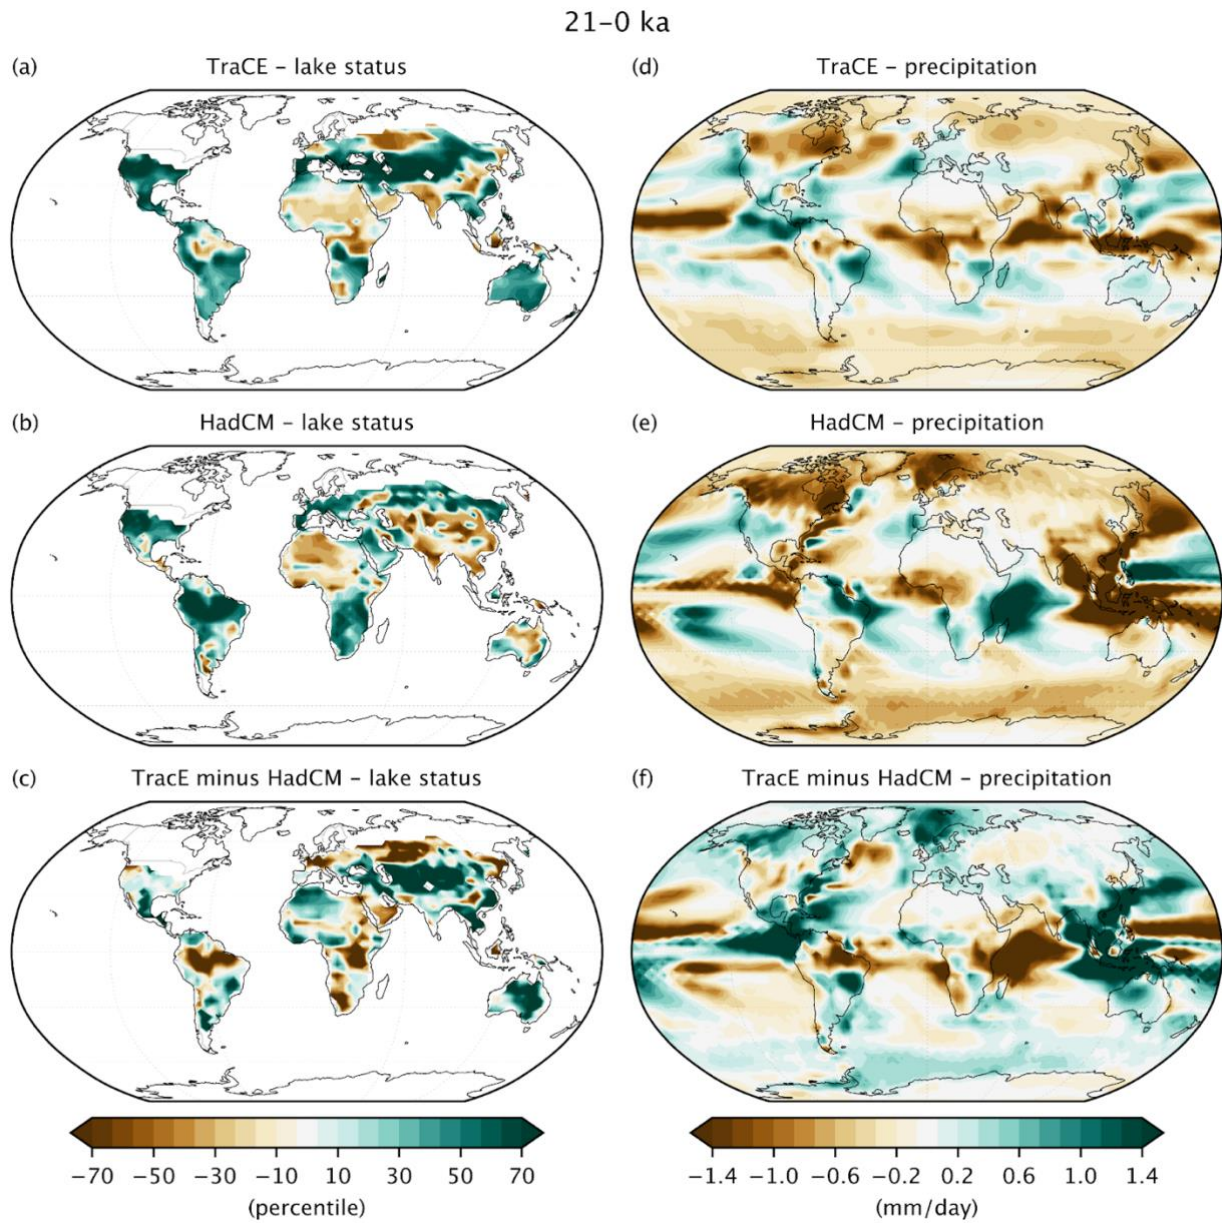

95 **Figure S6: Simulated Last Glacial Maximum anomalies. Same as Fig. 6 except that the values of TraCE (a,d), and HadCM (c,f) and their differences (b,e) are shown rather than the model prior and DAMP-21ka reconstruction.**

21-0 ka

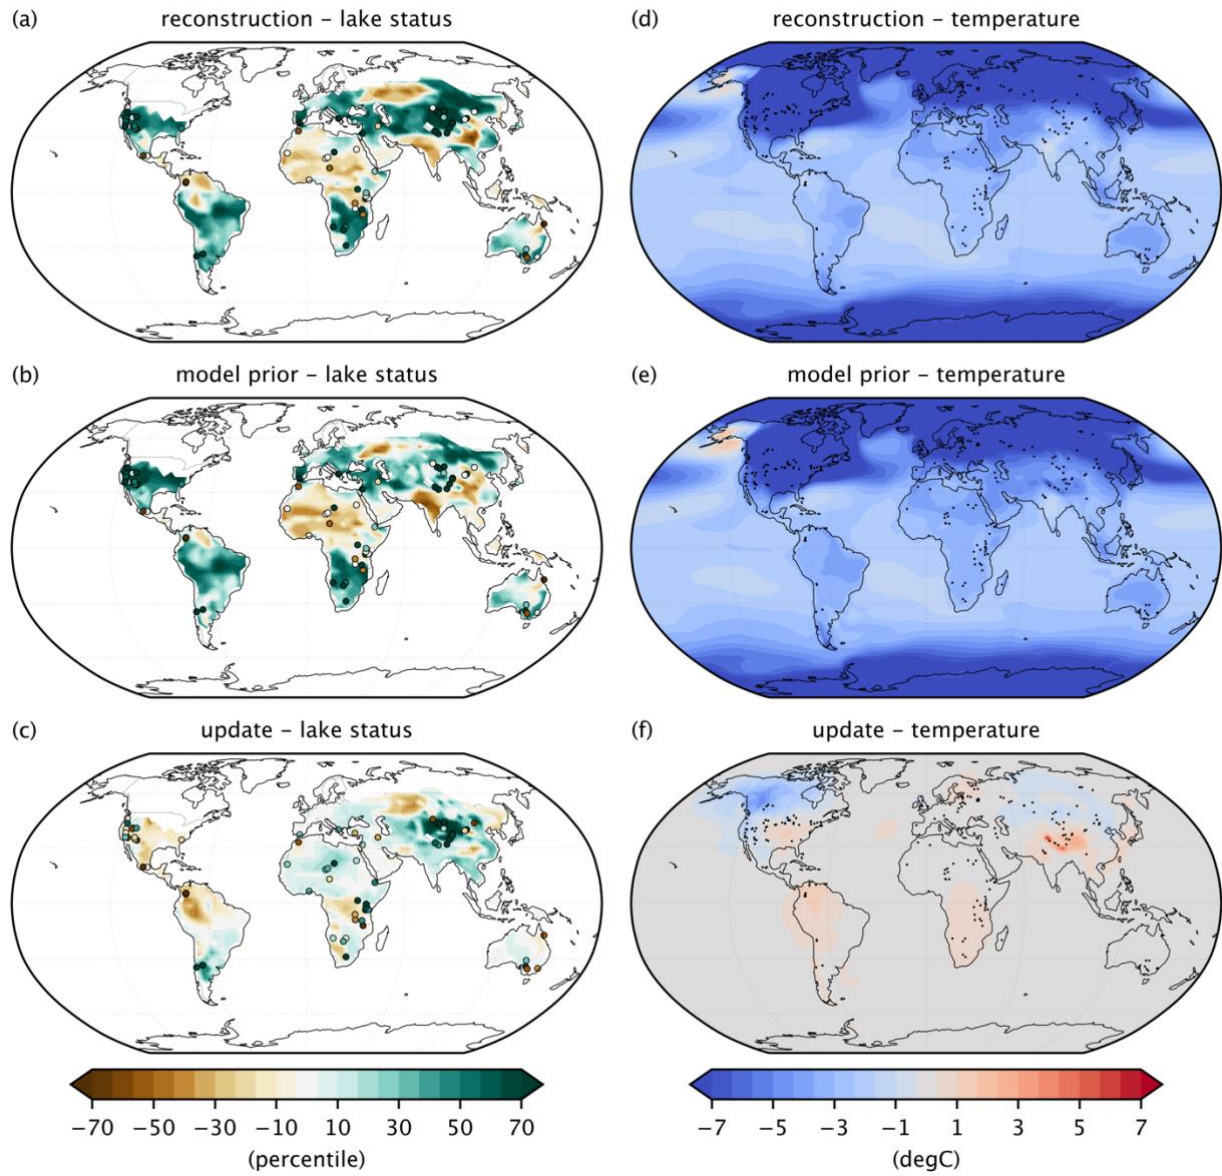

**Figure S7: Last Glacial Maximum lake status and temperature anomalies. Similar to figure 6 except that temperature anomalies are shown in the right-hand column (d-f).**

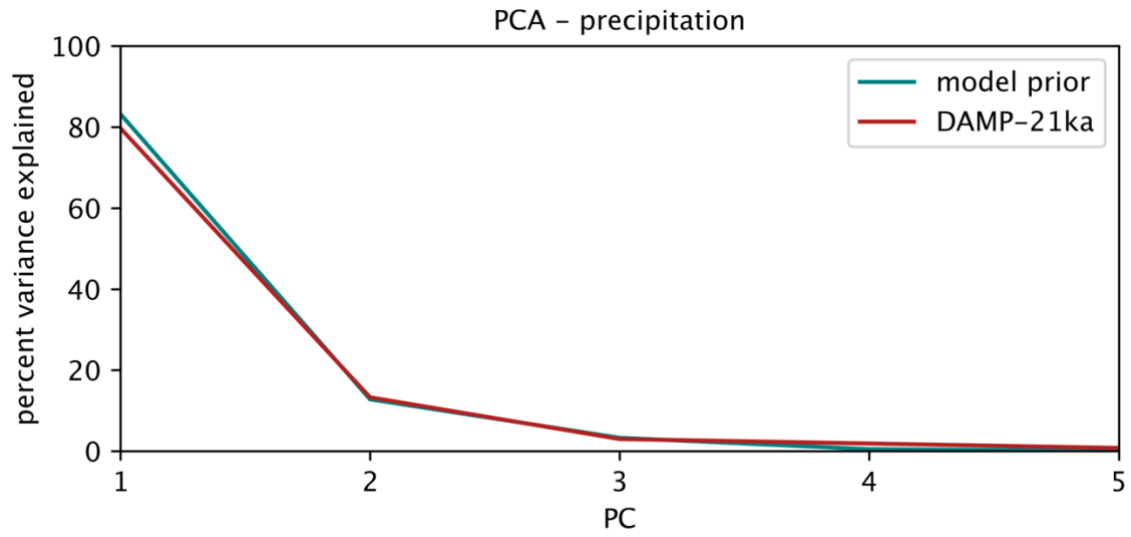

105 **Figure S8: Scree plot for mean annual precipitation PCA. The percent variance explained for the first 4 PCs for the model prior (green) and the DAMP-21ka reanalysis (red). PC1 and PC2 explain most of the variance for both datasets and are shown in Fig. 9 (reconstruction) and Fig. S9 (prior).**

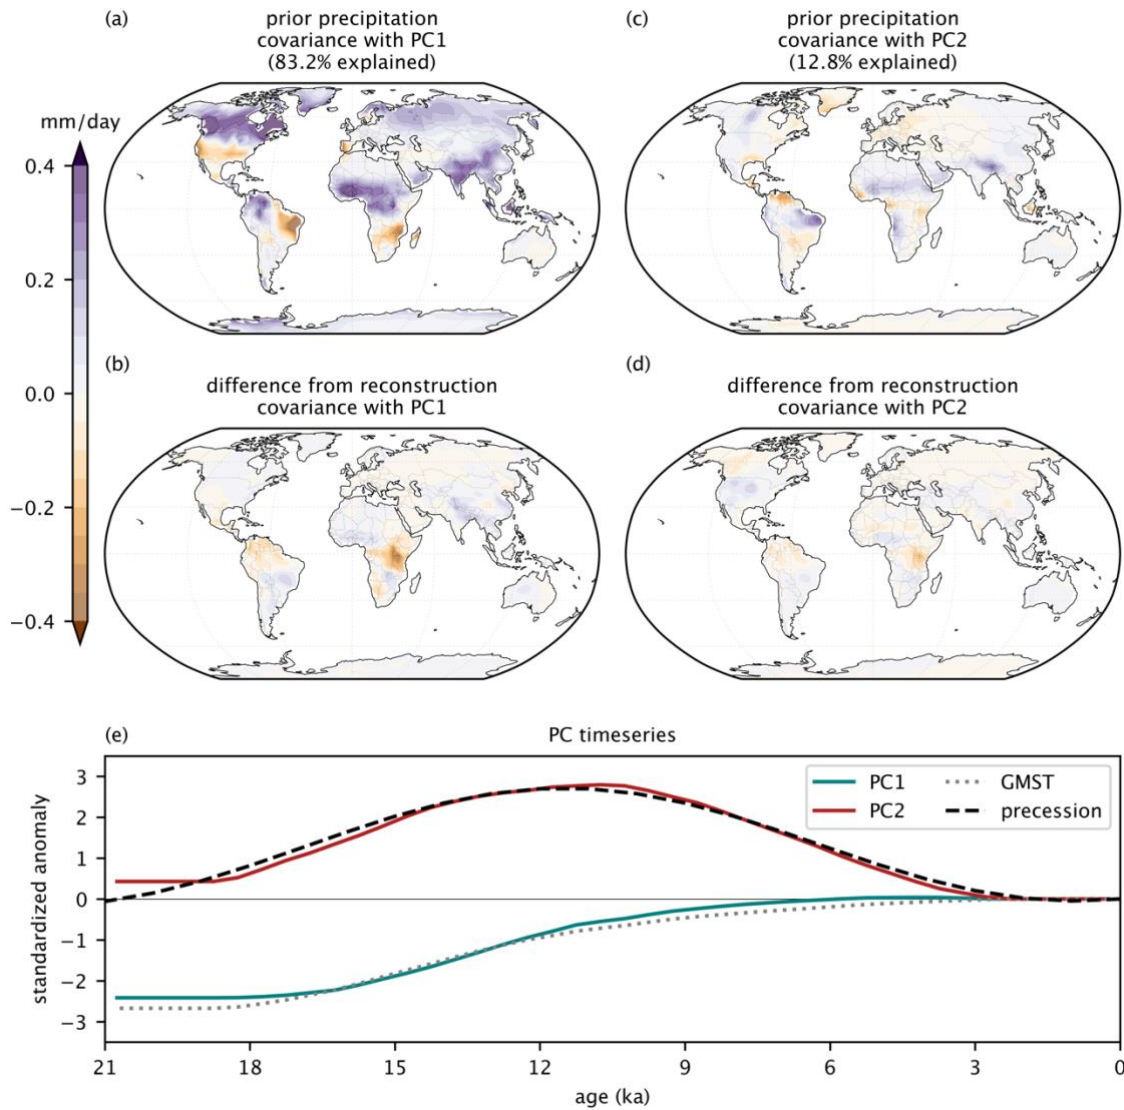

110 **Figure S9: PCA of terrestrial annual precipitation using the model prior (21–0 ka).** (a,c) The covariance between each grid cell and PC1 and PC2 is shown for the prior. (b,d) The difference between panels a and c compared to the covariance calculated from the reconstruction (Fig. 9). (e) The PC time series are plotted (solid lines) along with the global mean surface temperature (GMST) of the reconstruction (black) and the precessional forcing (grey; Berger and Loutre, 1991). The time series values are standardized (z-scores) to allow for plotting on a common y axis.

115

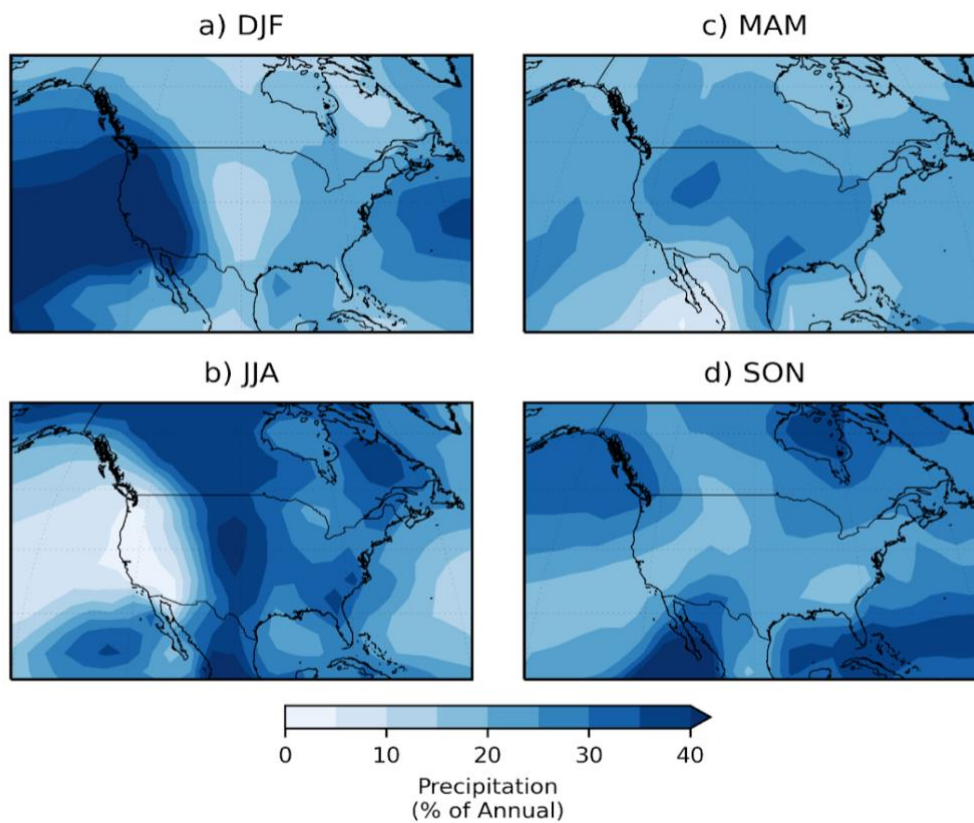

120 **Figure S10: Percentage of annual precipitation by season. Values represent the mean seasonal percentage during decades within the last millennium (1 to 0 ka) for the mean of TraCE and HadCM.**

## References

- Berger, A. and Loutre, M. F.: Insolation values for the climate of the last 10 million years, *Quaternary Science Reviews*, 10(4), 297–317, [https://doi.org/10.1016/0277-3791\(91\)90033-Q](https://doi.org/10.1016/0277-3791(91)90033-Q), 1991.
- 125 Liefert, D. T. and Shuman, B. N.: Pervasive desiccation of North American lakes during the Late Quaternary, *Geophys. Res. Lett.*, 47, e2019GL086412, <https://doi.org/10.1029/2019GL086412>, 2020.
- Lowry, D. P. and Morrill, C.: Is the Last Glacial Maximum a reverse analog for future hydroclimate changes in the Americas?, *Climate Dynamics*, 52(7), 4407–4427, <https://doi.org/10.1007/s00382-018-4385-y>, 2019.
- Gaspari, G. and Cohn, S. E.: Construction of correlation functions in two and three dimensions. *Quarterly Journal of the Royal Meteorological Society*, 125(554), 723–757, <https://doi.org/10.1002/qj.49712555417>, 1999.
- 130 Hancock, C. L., McKay, N. P., Erb, M. P., Kaufman, D. S., Routson, C. R., Ivanovic, R. F., Gregoire, L. J., and Valdes, P.: Global Synthesis of Regional Holocene Hydroclimate Variability Using Proxy and Model Data, *Paleoceanogr. Paleoclimatology*, 38, e2022PA004597, <https://doi.org/10.1029/2022PA004597>, 2023.
- Herzschuh, U., Böhmer, T., Li, C., Chevalier, M., Hébert, R., Dallmeyer, A., Cao, X., Bigelow, N. H., Nazarova, L., Novenko, E. Y., Park, J., Peyron, O., Rudaya, N. A., Schlütz, F., Shumilovskikh, L. S., Tarasov, P. E., Wang, Y., Wen, 135 R., Xu, Q., and Zheng, Z.: LegacyClimate 1.0: a dataset of pollen-based climate reconstructions from 2594 Northern Hemisphere sites covering the last 30 kyr and beyond, *Earth Syst. Sci. Data*, 15, 2235–2258, <https://doi.org/10.5194/essd-15-2235-2023>, 2023.
- Street-Perrott, F. A., Marchand, D. S., Roberts, N., and Harrison, S. P.: Global lake-level variations from 18,000 to 0 years ago: A palaeoclimate analysis, Oxford Univ. (UK). Geography School, <https://doi.org/10.2172/5609291>, 1989.
- 140 Tardif, R., Hakim, G. J., Perkins, W. A., Horlick, K. A., Erb, M. P., Emile-Geay, J., Anderson, D. M., Steig, E. J., and Noone, D.: Last Millennium Reanalysis with an expanded proxy database and seasonal proxy modeling, *Clim. Past*, 15, 1251–1273, <https://doi.org/10.5194/cp-15-1251-2019>, 2019.
- Whitaker, J. S. and Hamill, T. M.: Ensemble data assimilation without perturbed observations, *Monthly Weather Review*, 130(7), 1913–1924, [https://doi.org/10.1175/1520-0493\(2002\)130<1913:EDAWPO>2.0.CO;2](https://doi.org/10.1175/1520-0493(2002)130<1913:EDAWPO>2.0.CO;2), 2002.

145

## References (lake level proxies from Table S1).

- Agrawal, D.P., Gupta S.K., and Kusumgar, S.: Tata Institute radiocarbon date list VIII, Radiocarbon, 13, 84-93, 1971.
- Andreev, A.A., Klimanov, V.A.: Vegetation and climate history of central Yakutia during Holocene and late Pleistocene, In: Formirovanie rel'efa, korrelyatnykh otlozhenii irossypei severo-vostoka SSSR (Formation of deposits and placerson north-east of theUSSR), Magadan, pp.26-51, 1989.
- 150 Andreev,A.A., Klimanov,V.A., Sulerzhitskii,L.D., Khotinskii,N.A: Chronology of environmental changes in Central Yakutia during Holocene. In: Paleoklimaty golotsena ipozdnelednikov'ya (Paleoclimates of Holocene and late Glacial), Moscow, Nauka, pp.115-121, 1989.
- Andreeva, M.A.: Oзера SrednegoI Yuzhnogo Urala (Lakes of Middle and Southern Ural), Cheliabinsk, 270p., 1973.
- 155 Arslanov, Kh., Davydova, N., Khomutova, V., Krasnov, I., Malakhovsky, D., Saarnisto, M., Saksa, A. and Subetto, D.: Deglaciation of Karelian Isthmus; the Vuoksi system and its role in Lake Ladoga evolution In: Ecological problems of Lake Ladoga, Abstracts IInternational Symposium, St. Petersburg, p.43., 1993.
- Balaga, K.: Vegetational history of the Lake Lukcze environment (Lublin Polesie, E. Poland) during the Late-Glacial and Holocene, Acta Palaeobotanica, 22, 7-22, 1982.
- 160 Bannert, D., Brinckmann, J., Käding, K., Knetsch, G., Ürsten, M., and Mayrhofer H.: Zur Geologie Der Danakil-Senke, Geologische Rundschau, 59(2), 409–43, <https://doi.org/10.1007/bf01823804>, 1970.
- Barker, P., Telford, R., Merdaci, O., Williamson, D., Taieb, M., Vincens, A., and Gibert, E.: The sensitivity of a Tanzanian crater lake to catastrophic tephra input and four millennia of climate change, The Holocene, 10, 303–310, <https://doi.org/10.1191/095968300672848582>, 2000.
- 165 Barnosky, C. W.: Late Quaternary vegetation in the southwestern Columbia Basin, Washington, Quaternary Research, 23(1), 109–22, [https://doi.org/10.1016/0033-5894\(85\)90075-4](https://doi.org/10.1016/0033-5894(85)90075-4), 1985.
- Barton, C. E. and McElhinny, M. W.: A 10,000 year geomagnetic secular variation record from three Australian maars, Geophysics Journal of the Royal Astronomical Society, 67, 465-485, 1981.
- Beadle, L.: The inland waters of tropical Africa. An introduction to tropical limnology, Longman, London, 1981.
- 170 Beales, P.W.: The late Devensian and Flandrian vegetational history of Crose Mere, Shropshire.New Phytologist, 85, 133-161, 1980.
- Beaumont, P.B., Van Zinderen Bakker Sr, E.M., Vogel, J.C.: Environmental changes since 32 000 BP at Kathu Pan, northern Cape. Late Cainozoic palaeoclimates of the Southern Hemisphere. Proc. SASQUA symposium, Swaziland, 1983, pp. 329-338, 1984.
- 175 Bedwell, S. F: Prehistory and Environment, University of Oregon Press, Eugene, 1973.
- Bennett, K.D.: Devensian Late-glacial and Flandrian vegetational history at Hockham Mere,England, New Phytologist, 95, 457-487, 1983.

- Bennett, K.D.: Holocene pollen stratigraphy of central East Anglia, England, and comparison of pollen zones across the British Isles, *New Phytologist*, 109, 237-253, 1988.
- 180 Benson, L., Kashgarian, M., Rye, R., Lund, S., Paillet, F., Smoot, J., Kester, C., Mensing, S., Meko, D., and Lindström, S.: Holocene multidecadal and multicentennial droughts affecting Northern California and Nevada, *Quaternary Science Reviews*, 21(4-6), 659–82, [https://doi.org/10.1016/s0277-3791\(01\)00048-8](https://doi.org/10.1016/s0277-3791(01)00048-8), 2002.
- Beug, H -J.: Beiträge zur postglazialen Floren- und Vegetationsgeschichte in Süddalmatien: Der See "Malo Jezero" auf Mljet. Teil II: Häufigkeit und Pollenmorphologie der nachgewiesenen Pflanzensippen, *Flora* 150, 632-655, 1961.
- 185 Beug, H -J.: Über die ersten anthropogenen Vegetationsveränderungen i Süddalmatien an Hand eines neuen Pollendiagrammesvom "MaloJezero" auf Mljet. Sonderdruckausden Veröffentlichungendes Geobotanischen Institutesder Eidg. Techn. Hochschule, Stiftung Rübel (Zürich), 37, 9-15, 1962.
- Bradbury, J. P.: Paleolimnology of Lake Texcoco, Mexico. Evidence from diatoms, *Limnology and Oceanography*, 16(2), 180–200, <https://doi.org/10.4319/lo.1971.16.2.0180>, 1971.
- 190 Bradbury, J. P., Leyden, B., Salgado-Labouriau, M., Lewis, W. M., Schubert, C., Binford, M. W., Frey, D. G., Whitehead, D. R., and Weibezahn, F. H.: Late Quaternary environmental history of Lake Valencia, Venezuela, *Science*, 214, 1299-1305, 1981.
- Briggs, R. W., Wesnousky, S. G., and Adams K. D.: Late Pleistocene and Late Holocene lake highstands in the Pyramid Lake subbasin of Lake Lahontan, Nevada, USA, *Quaternary Research*, 64(2), 257–63, <https://doi.org/10.1016/j.yqres.2005.02.011>, 2005.
- 195 Bright, R.C.: Pollen and seed stratigraphy of Swan Lake, southeastern Idaho: its relationship to regional vegetational history and to Lake Bonneville history, Tebiwa, *Journal of the Idaho State University Museum*, 9, 1-47, 1966.
- Bolikhovskaya, N.S.: About the near Moscow Meshchera vegetation and climate history in Holocene. In: *Paleoklimaty golotsena evropeiskoi territorii SSSR (Holocene palaeoclimates of the European part of the USSR)*, Khotinskii, N.A. and Klimanov, V.A. (Eds.), Moscow, pp.76-94, 1988.
- 200 Bogdel', I.I., Vlasov, BP, Ilves, E.O., V.A. Klimanov: Sudoble section: a strato type of the reconstruction the Holocene environments in central Byelorussia. In: *Istoriyaozerv SSSR (History of lakes in the USSR)*, Abstracts VIAll-UnionSymposium, vol.1., Tallinn, pp.30-33, 1983.
- Borel, J.L., Damblon, F., Montjuvent, G., Mouthon, J., Yates, G.: Le lacde Pluvis (Bas-Bugey): paléoécologie et variations de niveau durant l'Holocène d'après le sondage 4. *Travaux et Documents de Géographie tropicale* 59: 25. (Résumés des communications, Xe Symposium, Associations des Palynologues de Langue Française, Bordeaux-Talence.) Centre d'Etudes de Géographie tropicale, C.R.N.S., 1987.
- 205 Borel, J.L., Bravard, J-P., Monjuvent, G. (Eds): Pluvis, lac disparu: du retrait glaciaire a l'emenagement hydroelectrique. *Revue de Paléobiologie*, 4, 1-101, 1990.
- 210 Bottcher, U, Jaeckel S. H., Ergenzinger, P-J., and Kaiser, K.: Quartare seebildungen und ihre mollusken inhalteim tibesti-gebirge, *Zeitschrift Fur Geomorphologie*, 16, 182–234. , 1972.



- Bottema, S.: A late Quaternary pollen diagram from Ioannina, north-western Greece. The climate, environment and industries of Stone Age Greece: part III. Proceedings of the Prehistoric Society 33, 26-29, 1967.
- 215 Bottema, S.: Late Quaternary vegetation history of Northwestern Greece. Proefschrift, University of Groningen, 190 pp, 1974.
- Bowler, J. M., Hope, G. S., Jennings, J. N., Singh, G., and Walker D.: Late Quaternary climates of Australia and New Guinea, *Quaternary Research*, 6(3), 359–94, [https://doi.org/10.1016/0033-5894\(67\)90003-8](https://doi.org/10.1016/0033-5894(67)90003-8), 1976.
- 220 Bowler, J. M., Qi, H., Kezao, C., Head, M. J., and Baoyin, Y.: “Radiocarbon dating of playa-lake hydrologic changes: examples from Northwestern China and Central Australia, *Palaeogeography, Palaeoclimatology, Palaeoecology*, 54 (1-4), 241–60, [https://doi.org/10.1016/0031-0182\(86\)90127-6](https://doi.org/10.1016/0031-0182(86)90127-6), 1986.
- Brodin, Y-W., The Holocene development of Lake Wielke Gacno, Northern Poland , interpreted from remains of aquatic insects, Manuscript, from thesis, 34pp, 1985.
- 225 Brook, G. A., Marais, E., Srivastava, P., and Jordan, T.: Timing of lake-level changes in Etosha Pan, Namibia, since the middle Holocene from OSL ages of relict shorelines in the Okondeka region, *Quaternary International*, 175, 29–40, <https://doi.org/10.1016/j.quaint.2007.05.020>, 2007.
- Brook, G. A., Railsback, L. B., and Marais, E.: Reassessment of carbonate ages by dating both carbonate and organic material from an Etosha Pan (Namibia) stromatolite: Evidence of humid phases during the last 20ka, *Quaternary International*, 229, 24–37, <https://doi.org/10.1016/j.quaint.2010.05.009>, 2011.
- Brugam, R. B.: Postglacial diatom stratigraphy of Kirchner Marsh, Minnesota, *Quaternary Research*, 13, 133-146, 1980.
- 230 Buckley, J. D. and Willis E. H.: Isotopes’ radiocarbon measurements VIII, *Radiocarbon* 12(1), 87–129, <https://doi.org/10.1017/s0033822200036225>, 1970.
- Burney, D. A.: Pre-settlement vegetation changes at Lake Tritrivakely, Madagascar, *Palaeoecology of Africa A.*, 18, 357-381, 1987.
- 235 Buch, M.W., Zöller, L.: Pedostratigraphy and thermoluminescence-chronology of the western margin- (lunette-) dunes of Etosha Pan/Northern Namibia. *Würzburger Geographische Arbeiten* 84, 361-384, 1992.
- Butzer, K. W., Fock, G. J., Stuckenrath R., and Zilch A..Palaeohydrology of late pleistocene Lake Alexandersfontein, Kimberley, South Africa, *Nature*, 243, 328-330, 1973.
- Butzer, K. W., Isaac, G. L., Richardson, J. L., and Washbourn-Kamau, C.: Radiocarbon dating of East African lake levels, *Science* 175(4026), 1069–76, <https://doi.org/10.1126/science.175.4026.1069>, 1972.
- 240 Butzer, K.W.: Recent history of an Ethiopian delta: the Omo River and the level of Lake Rudolf. University of Chicago, Dept. of Geography, Chicago, 1971.
- Chalié, F. and Gasse, F.: Late Glacial–Holocene diatom record of water chemistry and lake level change from the tropical East African Rift Lake Abiyata (Ethiopia), *Palaeogeography, Palaeoclimatology, Palaeoecology*, 187, 259–283, [https://doi.org/10.1016/s0031-0182\(02\)00480-7](https://doi.org/10.1016/s0031-0182(02)00480-7), 2002.

- 245 Chamard, Ph. C.: Monographie d'une sebkha continentale du sud-ouest saharien: la sebkha de chemchane (adras de Mauritanie), Bulletin de l'institut Francaisd'afrique Noire, Senegal 35A, 207-243, 1973.
- Clark, J.D., Haynes, C.V., Mawby, J.E., Gautier, A.: Interim report on palaeoanthropological investigations in the Malawi Rift. Quaternaria 13, 305-354, 1970.
- Collins, G. B.: Implications of diatom succession in post-glacial sediments from two sites in northern Iowa, Ph.d. Thesis, 250 Iowa State University, Ames, 197pp, 1968.
- Commelin, D., Petit-Maire N., and Casanova, J.: Chronologie isotopique saharienne des derniers 10,000 ans, Bulletin du Musee d'Anthropologie prehistorique de Monaco, 23, 37-88, 1980.
- Costa, K., Russell, J., Konecky, B., and Lamb, H.: Isotopic reconstruction of the African Humid Period and Congo Air Boundary migration at Lake Tana, Ethiopia, Quaternary Science Reviews, 83, 58-67, 255 <https://doi.org/10.1016/j.quascirev.2013.10.031>, 2014.
- Crane, H. R. and Griffin J. B.: University of Michigan radiocarbon dates III, Science 128(3332), 1117-23. <https://doi.org/10.1126/science.128.3332.1117>, 1958.
- Cui H.A.T., Kong Z.C.: Preliminary results on the climatic change in Holocene hypsithermal period of eastern-central Inner Mongolia, In: Shi YF, Kong ZC (eds.) Climate and Environment of Holocene Megathermal in China. Ocean Press, 260 Beijing, China, pp. 72-79, 1992.
- Cui H.T., Wu W.L., Song C.Q., Wu H.L.: Reconstruction the the Holocene environment in the Daqingshan region of inner Mongolia, In: Zhang LS (ed.) Study on the History of the Living Environment in China. Ocean Press, Beijing, China, pp. 285-295, 1993.
- Damon, P. E., Haynes, C. V., and Long A.: Arizona radiocarbon dates V, Radiocarbon, 6,91-107, 265 <https://doi.org/10.1017/s0033822200010560>, 1964.
- Davydova, N.N.: Diatom ovyevodorosli-indicatoryprirodnikh uslovii vodoemovv golotsene (The diatoms as indicator of basin environmental conditions in Holocene), Leningrad, 240p., 1985.
- Davydova, N.N.: Diatomic algae in lake sediments. In: Istoria ozer Sevan, Isyk'Kul', Balkhash, Zaisan I Aral (The history of Sevan, Issyk-Kul, Balkhash, Zaisan and Aral Lakes), Leningrad, Nauka, pp.103-107, 1991.
- 270 De Deckker, P.: Holocene ostracodes, other invertebrates and fish remains from cores of four maar lakes in Southeastern Australia. Proceedings of the Royal Society of Victoria. Vol. 94, no. 4, pp. 183-220, 1982.
- De Deckker, P., Moros, M., Perner, K. et al.: Influence of the tropics and southern westerlies on glacial interhemispheric asymmetry. Nature Geosci 5, 266-269, <https://doi.org/10.1038/ngeo1431>, 2012.
- Deevey, E. S., Holocene forests and Maya disturbance near Quexil Lake, Peten, Guatemala, Polskie Archiwum 275 Hydrobiologii, 25:117-129, 1978.
- Delcourt, H. R., Delcourt, P. A., and E. C. Spiker, A 12000-year record of forest history form Cahaba Pond, St. Clair County, Alabama, Ecology 64(4), 874-87, <https://doi.org/10.2307/1937210>, 1983.

- Delibrias, G., Guillier, M. T., and Labeyrie J.: Gif natural radiocarbon measurements II, *Radiocarbon*, 8, 74–95, <https://doi.org/10.1017/s0033822200000060>, 1966a.
- 280 Delibrias, G, Guillier, M. T., and Labeyrie J., Gif natural radiocarbon measurements VIII, *Radiocarbon* 16(1), 15–94, <https://doi.org/10.1017/s0033822200001417>, 1974.
- Delibrias, G, Guillier, M. T., and Labeyrie J., Gif natural radiocarbon measurements VI, *Radiocarbon* 13, 223, 1971.
- Digerfeldt, G., James E. A., and Björck, S.: Reconstruction of past lake levels and their relation to groundwater hydrology in the parkers prairie sandplain, west-central Minnesota, *Palaeogeography, Palaeoclimatology, Palaeoecology*, 94(1-4), 99–
- 285 118, [https://doi.org/10.1016/0031-0182\(92\)90115-1](https://doi.org/10.1016/0031-0182(92)90115-1), 1992.
- Dodson, J.R.: Late Pleistocene vegetation and environments near Lake Bullenmerri, Western Victoria. *Australian Journal of Ecology*, 4, 419-427, 1979.
- Dodson, J. R.: Holocene vegetation and environments near Goulburn, New South Wales, *Australian Journal of Botany* 34(3), 231, <https://doi.org/10.1071/bt9860231>, 1986.
- 290 Dorofeyuk, N.I.: Holocene palaeogeography of MPR by diatom record from lake bottom sediments. In: *Prirodnye usloviya, rastitelnyi pokrov i zhivotnyi mir Mongolii* (Nature conditions, vegetation cover and animals of Mongolia), Pushchino, pp.61-82, 1988.
- Durand, A., Fontes J. Ch., Gasse, F., Icole, M., and Lang, J.: Le nord-ouest du lac Tchad au Quaternaire: Etude de paleoenvironnements alluviaux, eoliens, palustres et lacustres, *Palaeoecology of Africa*, 16, 215-243, 1984.
- 295 Dury, G. H.: Paleohydrologic implications of some pluvial lakes in northwestern New South Wales, Australia, *Geological Society of America Bulletin*, 84(11), 3663, [https://doi.org/10.1130/0016-7606\(1973\)84<3663:piospl>2.0.co;2](https://doi.org/10.1130/0016-7606(1973)84<3663:piospl>2.0.co;2), 1973.
- Eldridge, K. L., Stipp, J. J., and Cohen S. J.: "University of Miami Radiocarbon Dates III." *Radiocarbon* 17 (2): 239–46. <https://doi.org/10.1017/s0033822200002083>. 1975.
- Elovicheva, Ya.K., Bogdel', I.I.: New Holocene sections of Byelarusia. In: *Geologicheskoe stroenie osadochnoi tolshchi Belorussii* (Geological composition of sedimentary sequence of Byelorussia), Minsk, Nauka i Tekhnika, pp.141-169, 300 1985.
- Ewing, H. A.: Ecosystem development and response to climatic change: a comparative study of forest-lake ecosystems on different substrates, Doctoral Dissertation, University of Minnesota, 2000.
- Faure, H., Manguin, E., and Nydal, R.: Formations lacustres du Quaternaire superieur du Niger oriental: diatomites Et ages 305 absolus. *bulletin Du Bureau de Recherches Geologiques Et minières*, Paris, 3, 41-63, 1963
- Fergusson, G. J., and Libby, W. F.: UCLA Radiocarbon Dates i, *Radiocarbon*, 4: 109–14, <https://doi.org/10.1017/s0033822200036572>, 1962.
- Flint, R. F. and Gale, W. A.: Stratigraphy and radiocarbon dates at Searles Lake, California, *American Journal of Science*, 256(10), 689–714, <https://doi.org/10.2475/ajs.256.10.689>, 1958.
- 310 Florschütz, F., Menéndez Amor, J., Wijmstra, T.A.: Palynology of a thick Quaternary succession in southern Spain, *Palaeogeography, Palaeoclimatology, Palaeoecology*, 10, 233-264, 1971.

- Fontes, J. C., Pouchan, P., Moussie, C., and Weidmann. M.: phases humides au pleistocene superieur et al'holocene dans le sud de l'afar (t.f.a.i.), comptes Rendus Hebdomadaires de l'academie desSciences, Paris 277, 1973.
- 315 Fries, M.: Pollen profiles of late Pleistocene and recent sediments from Weber Lake, northeastern Minnesota, *Ecology*, 43(2), 295, <https://doi.org/10.2307/1931985>, 1962.
- Fritz, S.C.: Lake development and limnological response to prehistoric and historic land-use in Diss, Norfolk, U.K., *Journal of Ecology*, 77, 182-202, 1989.
- Fritz, P. and Krouse H. R.: Wabamun Lake past and present, an isotopic study of the water budget. In : "Proceedings of the Symposium on the Lakes of Western Canada." (E.R. Reinelt, A.H. Laycock and W.M. Schultz, Eds.),pp. 244-259.
- 320 University of Alberta Water Resources Centre, University of Alberta, Edmonton, Alberta, Canada, 1973
- Fu-Bao, W. and Fan, C. Y.: Climatic changes in the Qinghai-Xizang (Tibetan) region of China during the Holocene, *Quaternary Research*, 28(1), 50–60, [https://doi.org/10.1016/0033-5894\(87\)90032-9](https://doi.org/10.1016/0033-5894(87)90032-9), 1987.
- Ellerton, D., Shulmeister, J., Woodward, C., Moss, P: Last Glacial Maximum and Last Glacial-Interglacial Transition pollen record from northern NSW, Australia: evidence for a humid late Last Glacial Maximum and dry deglaciation in parts of eastern Australia. *Journal of Quaternary Science*. Vol. 32, no. 6, pp. 717-728, 2017.
- 325 Garcin, Y., Junginger, A., Melnick, D., Olago, D. O., Strecker, M. R., and Trauth, M. H.: Late Pleistocene–Holocene rise and collapse of Lake Suguta, northern Kenya Rift, *Quaternary Science Reviews*, 28, 911–925, <https://doi.org/10.1016/j.quascirev.2008.12.006>, 2009.
- Garrett-Jones, S.: Holocene vegetation and lake sedimentation in the Markham Valley, PNG, Ph.d. Thesis, Australian National University, Canberra, 1979.
- 330 Gasse, F.: Diatoms for reconstructing palaeoenvironments and paleohydrology in tropical semi-arid zones, *Hydrobiologia*, 154(1), 127–63, <https://doi.org/10.1007/bf00026837>, 1987.
- Gasse, F.: Evolution of Lake Abhé (Ethiopia and TFAI), from 70,000 b.p., *Nature*, 265, 42–45, <https://doi.org/10.1038/265042a0>, 1977.
- 335 Gasse, E. and Street, F. A.: Late Quaternary Lake-level fluctuations and environments of the northern Rift valley and Afar region (Ethiopia and Djibouti), *Palaeogeography, Palaeoclimatology, Palaeoecology*, 24, 279–325, [https://doi.org/10.1016/0031-0182\(78\)90011-1](https://doi.org/10.1016/0031-0182(78)90011-1), 1978.
- Geng K, Cheng YF (1990) Formation, development and evolution of Jilantai salt-lake, inner Mongolia. *Acta Geographica Sinica* 45(3): 341-349 (in Chinese).
- 340 Gerlach, T., Koszarski, L., Koperowa, W., Kosta, E.: Sédiments lacustres postglaciaires dans la dépressionde Jaslo-Sanok. *Studia Geomorphologia Carpatho-Balcanica*, 6, 37-61, 1972.
- Geze, F.: New dates on ancient Galla Lake levels (Ethiopian Rift Valley), *Bulletin of the Geophysical Observatory, Addis Ababa*, 15, 119-124, 1975.

- 345 Gibert, E., Bergonzini, L., Massault, M., and Williamson, D.: AMS-14C chronology of 40.0 cal ka BP continuous deposits from a crater lake (Lake Massoko, Tanzania), *Palaeogeography, Palaeoclimatology, Palaeoecology*, 187, 307–322, [https://doi.org/10.1016/s0031-0182\(02\)00483-2](https://doi.org/10.1016/s0031-0182(02)00483-2), 2002.
- Gillespie, R., Street-Perrott, F. A., and Switsur, R.: Post-glacial arid episodes in Ethiopia have implications for climate prediction, *Nature*, 306, 680–683, <https://doi.org/10.1038/306680a0>, 1983.
- 350 Gilman, A.: Stephen f. Bedwell: Fort Rock Basin, prehistory and environment, *Antiquity*, 49(193): 77–78. <https://doi.org/10.1017/s0003598x00063420>, 1975.
- Godwin, H., Tallantire, P. A.: Studies in the post-glacial history of Britain vegetation, *Journal of Ecology*, 39, 285–307, 1951.
- Goldsmith, Y. W., S. Broecker, H. Xu, P. J. Polissar, P. B. deMenocal, N. Porat, J. H. Lan, Peng Cheng, W. J. Zhou, and Z. S. An: Northward extent of East Asian Monsoon covaries with intensity on orbital and millennial timescales, *Proceedings of the National Academy of Sciences*, 114(8), 1817–21, <https://doi.org/10.1073/pnas.1616708114>, 2017.
- 355 Gonzalez, M. A.: Pleistocene and Holocene lake levels in the actual Salina Del Bebedero, Argentina. 14C dates relations with the latest Pleistocene glaciation, Abstract, Hamburg Symposium on Desert Encroachment, Fast Tropical Erosion, Coastal Subsidence and Submergence, Unpaginated, 1983.
- Gu S.G., Liang Z.C., Zhang Z.G., Chen H.Q., Zhang H.W.: Quaternary chronological stratigraphy in Chaiwopu Basin. In: Shi YF, Wen QZ, Qu YG (eds) *Changes in Quaternary climate-environments and geohydrological conditions in Chaiwopu Basin, Xinjiang*. Ocean Press, Beijing, pp. 38–45 (in Chinese), 1990.
- 360 Haberyan, K. A. and Hecky. R. E.: The Late Pleistocene and Holocene Stratigraphy and Paleolimnology of lakes Kivu and Tanganyika, *Palaeogeography, Palaeoclimatology, Palaeoecology* 61, 169–97. [https://doi.org/10.1016/0031-0182\(87\)90048-4](https://doi.org/10.1016/0031-0182(87)90048-4), 1987.
- Haberyan, K. A.: Fossil diatoms and the paleolimnology of Lake Rukwa, Tanzania, *Freshwater Biology*, 17, 429–436, <https://doi.org/10.1111/j.1365-2427.1987.tb01064.x>, 1987.
- 365 Haberle, S.G.: A 23,000-yr pollen record from Lake Euramoo, Wet Tropics of NE Queensland, Australia. *Quaternary Research*. Vol. 64, pp. 343–3, 2005.
- Han S.T.: Change sequences of Holocene environments in the Balikun Lake, Xinjiang. In: Department of Geography (ed.) *Late Quaternary environmental changes in arid inlands of northern Xinjiang*. Unpublished Report, Department of Geography, Xinjiang University. p24–44, 1991.
- 370 Han S.T., Dong G.R.: Preliminary study of Holocene environmental evolution in the Balikun Lake. *Marine Geology and Quaternary Geology* 10:91–98. (in Chinese), 1990.
- Han S.T., Yuan YJ.: Changes in climatic sequence during the last 35,000 yr BP in Balikun Lake, Xinjiang Province. *Acta Geographica Sinica* 45:350–362. (in Chinese), 1990.
- 375 Harvey, T.J.: The Paleolimnology of Lake Mobutu Sese Seko, Uganda-Zaire: the Last 28,000 Years, Ph.D. thesis, Duke University, Durham, North Carolina, 113pp, 1976.

- Haworth, E. Y.: Diatom succession in a core from Pickerel Lake, northeastern South Dakota, Geological Society of America Bulletin, 83(1), 157, [https://doi.org/10.1130/0016-7606\(1972\)83\[157:dsiacf\]2.0.co;2](https://doi.org/10.1130/0016-7606(1972)83[157:dsiacf]2.0.co;2), 1972.
- Haynes, C. V., Mehringer, P. J., and Zaghoul E. S. A.: Pluvial lakes of north-western Sudan, The Geographical Journal, 145(3), 437, <https://doi.org/10.2307/633212>, 1979.
- Haynes, C.V.: Lacustrine chronology and geomorphology of Selima Oasis, northern Sudan. Abstracts with Programs, Geological Society of America, 95th Annual Meeting, October 1982. p.511, 1982.
- Haynes, C.V., Jr., J.C. Ritchie and C.H. Eyles,: Past Vegetation and Climate of the Mogollon Rim Area, Arizona. Ph.D. thesis, University of Arizona, Tucson, 166pp., 1983.
- 385 Heusser, C. J.: Quaternary pollen record from Laguna de Tagua Tagua, Chile, Science 219(4591), 1429–32, <https://doi.org/10.1126/science.219.4591.1429>, 1983.
- Heusser, C.J.: Personal communication., 1983.
- Higgs, E.S., Vita-Finzi,C.: The climate, environment and industries of Stone Age Greece: partII, Proceedings of the Prehistoric Society, 32, 1-29, 1966.
- 390 Hjelmroos, M.: The Post-Glacial development of Lake Wielke Gacno, NW-Poland. The human impact on the natural vegetation-recorded by means of pollen analysis and 14C dating, Acta, Palaeobotanica, 21, 129-144, 1981.
- Hjelmroos,M.: The Holocene development of Lake Wielke Gacno, NW Poland, Acta Palaeobotanica, 22, 23-46, 1982.
- Hjelmroos-Ericsson, M.: Holocene development of Lake Wielke gacno area, northwestern Poland, Ph.d. Thesis, University of Lund, 1982.
- 395 Holliday, V. T.: Morphology of late Holocene soils at the Lubbock Lake archaeological site, Texas, Soil Science Society of America, 49(4), 938–46, <https://doi.org/10.2136/sssaj1985.03615995004900040030x>, 1985.
- Hu D.S. The lake evolution in the Kekexili Region. Arid Land Geography 18 (1): 60-67 (in Chinese), 1995.
- Huang Q., Cai B.Q., Yu J.Q.: Chorology of saline lakes-Radiocarbon dates and sedimentary cycles in saline lakes on the Qinghai-Xizang (Tibet) plateau. Chinese Science Bulletin 21: 990-994 (in Chinese), 1980.
- 400 Huang C.X., Zhang Q.S., Liu F.T.: A preliminary study of paleovegetation and paleoclimate in the later period of late Pleistocene in Bangongcuo Lake region of Xizang. Journal of Natural Researches 4(3): 247-253 (in Chinese), 1989.
- Huang B.R.: Quaternary ostracode analysis in Chaiwopu Basin. In: Shi YF, Wen QZ, Qu YG (eds) Changes in Quaternary climate-environments and geohydrological conditions in Chaiwopu Basin, Xinjiang. Ocean Press, Beijing, pp. 75-84 (in Chinese), 1990.
- 405 Huang Q., Chen K.Z.: Paleoclimate changes during the last 730,000 yr B.P. from Chaerhan Salt Lake in Chadamu Basin. Quaternary Sciences 3: 205-211, 1990.
- Hutchinson, G. E. and Cowgill, U. M.: Chemical examination of a core from Lake Zeribar, Iran, Science, 140(3562), 67–69, <https://doi.org/10.1126/science.140.3562.67>, 1963

- 410 Hutchinson, D. R., Ferrebee, W. M., Knebel, H. J., Wold, R. J., and Isachsen, Y. W.: The sedimentary framework of the southern basin of Lake George, New York, *Quaternary Research* 15(1), 44–61, [https://doi.org/10.1016/0033-5894\(81\)90113-7](https://doi.org/10.1016/0033-5894(81)90113-7), 1981.
- Huntsman-Mapila, P., Ringrose, S., Mackay, A. W., Downey, W. S., Modisi, M., Coetzee, S. H., Tiercelin, J.-J., Kampunzu, A. B., and Vanderpost, C.: Use of the geochemical and biological sedimentary record in establishing palaeoenvironments and climate change in the Lake Ngami basin, NW Botswana, *Quaternary International*, 148, 51–64, 415 <https://doi.org/10.1016/j.quaint.2005.11.029>, 2006.
- Jacobs, B.F.: Past Vegetation and Climate of the Mogollon Rim Area, Arizona, Ph.D. thesis, University of Arizona, Tucson, 166pp, 1983.
- Junginger, A., Roller, S., Olaka, L. A., and Trauth, M. H.: The effects of solar irradiation changes on the migration of the Congo Air Boundary and water levels of paleo-Lake Suguta, Northern Kenya Rift, during the African Humid Period 420 (15–5ka BP), *Palaeogeography, Palaeoclimatology, Palaeoecology*, 396, 1–16, <https://doi.org/10.1016/j.palaeo.2013.12.007>, 2014.
- Kelts, K. and Shahrabi, M.: Holocene sedimentology of hypersaline Lake Urmia, northwestern Iran, *Palaeogeography, Palaeoclimatology, Palaeoecology* 54(1-4), 105–30, [https://doi.org/10.1016/0031-0182\(86\)90120-3](https://doi.org/10.1016/0031-0182(86)90120-3), 1986.
- Kendall, R. L.: An ecological history of the Lake Victoria basin, *Ecological Monographs*, 39, 121–176, 425 <https://doi.org/10.2307/1950740>, 1969.
- Kershaw, A. P.: “A pollen diagram from lake euramoo, north-east Queensland, Australia, *New Phytologist*, 69(3), 785–805, <https://doi.org/10.1111/j.1469-8137.1970.tb02463.x>, 1970.
- Khomutova, V.I.: Pollen and spores in the bottom deposits of Vozheand Lacha Lakes, In: *Gidrobiologiyaozer Vozhe iLacha (Hidrobiology of Vozheand Lachalakes)*, Leningrad, Nauka, pp.236-246, 1978.
- 430 Khotinskii, N.A.: *Golotsen Severnoi Evrazii (Holocene of the Northern Eurasia)*, Moscow, Nauka, 200p, 1977.
- Korde, N.V., Ulomskii, S.N.: Short characteristic of hidrological regime and microorganisms of Galichskoe Lake Trudy Laboratorii sapropelevykh otlozhenii (Inst. Lesa Akad.Nauk SSSR), no.7, pp.68-88, 1959.
- Kozlovskaya, L.S.: To the question about genesis of the lakes in the central region of the European part of the USSR, In: *Trudy Laboratoriisapropelevykh otlozhenii (Inst. Lesa Akad. Nauk SSSR)*, no.7, pp.43-57, 1959.
- 435 Kershaw, A. P.: A long continuous pollen sequence from north-eastern Australia, *Nature*, 251, 222–223, <https://doi.org/10.1038/251222a0>, 1974.
- Kershaw, A.P.: Stratigraphy and pollen analysis of bromfield swamp, north eastern Queensland, Australia. *New Phytologist*, 75, 173-191, <https://doi.org/10.1111/j.1469-8137.1975.tb01385.x>, 1975.
- Kropelin, S.: Palaeoclimatic evidence from early to mid-Holocene playas in the Gilf Kebir (South-west Egypt), 440 *Palaeoecology of Africa*, 18, 189-208, 1987.
- Lamb, H. F., Eicher, U., and Switsur, V. R.: An 18,000-year record of vegetation, lake-level and climatic change from Tigalmamine, Middle Atlas, Morocco, *Journal of Biogeography* 16(1), 65, <https://doi.org/10.2307/2845311>, 1989.

- Lamb, H. F., Bates, C. R., Coombes, P. V., Marshall, M. H., Umer, M., Davies, S. J., and Dejen, E.: Late Pleistocene desiccation of Lake Tana, source of the Blue Nile, *Quaternary Science Reviews*, 26, 287–299, 445 <https://doi.org/10.1016/j.quascirev.2006.11.020>, 2007.
- Li S.K., Zhang Q.S. Lake level fluctuations during last 170,000 years in the middle regions of Kunlun Mts. *Geographical Research* 10(2): 27-37 (in Chinese), 1991.
- Li B.X., Cai B.Q., Liang Q.S. Sedimentary characteristics of Aiding Lake, Tulufan Basin. *Chinese Science Bulletin* 1998(8): 10-13 (in Chinese), 1989.
- 450 Li H.M., Li H.A.T., Yu C.L.: Quaternary magnetic stratigraphy in Chaiwopu Basin. In: Shi YF, Wen QZ, Qu YG (eds) *Changes in Quaternary climate- environments and geohydrological conditions in Chaiwopu Basin, Xinjiang*. Ocean Press, Beijing, pp. 25-37 (in Chinese), 1990.
- Li Y.F., Zhang Q.S., Li B.Y., Liu F.T.: The ostracode of late Late-Pleistocene in Bangongcuo area of Tibetan and its palaeogeographical significance. *Acta Micropalaeontologica Sinica* 8(1): 57-64 (in Chinese), 1991.
- 455 Li B.Y., Li Y.F., Kong Z.C., Shan S.F., Zhu L.P., Li S.K.: Environmental changes during last 20ka in the Gounongcuo Region, Kekexili, Tibet. *Chinese Science Bulletin*, 39 (18): 1727-1728 (in Chinese), 1994.
- Li Y.F., Zhang Q.S., Li B.Y.: Ostracode and its environmental evolution during late Pleistocene in the west Tibet. In: Committee of Tibet Research of China (ed) *Collections paper for meeting of Tibetan Plateau and global changes*. Meteorology Press, Beijing, 52-69 (in Chinese), 1995.
- 460 Li Y.F.: Lake records for climate and environments during last 20ka: Ostracode fossil and paleoenvironments. In: Li BY (ed), *Natural environments in the Kekexili Regions, Qinghai Province*. Science Press, Beijing, pp. 206-211 (in Chinese), 1996.
- Lin RF, Wei KQ, Cheng ZY, Wang ZX, Gasse F, Fontes JC, Gibert E, Tuchoka P, A palaeoclimatic study on lacustrine cores from Manas Lake, Xinjiang, western China. *Geochimica* 25(1): 63-71 (in Chinese), 1996.
- 465 Livingstone, D.A.: Sedimentation and the history of water level change in Lake Tanganyika. *Limnol. Oceanogr.* 10, 607–610, 1965.
- Long, A. and Muller, A. B.: Arizona Radiocarbon Dates X, *Radiocarbon* 23(2), 191–217 <https://doi.org/10.1017/s0033822200037590>, 1981.
- Manny, B.A., Wetzel R. G., and Bailey, R. E.: Paleolimnological sedimentation of organic carbon, nitrogen, phosphorus, fossil 470 pigments, pollen, and diatoms in a hypereutrophic hardwater lake: A case history of eutrophication. *Polskie Archiwum, Hydrobiologii*, 25, 243-267, 1978.
- MacDonald, G. M.: Late Quaternary palaeoenvironments of the Morley Flats and Kananaskis Valley of southwest Alberta, *Canadian Journal of Earth Sciences*, 19, 23-35, 1982.
- Macumber, P.G.: The geology and paleohydrology of the Row Swamp, *Journal of the Geological Society of Australia*, 25, 475 307-320, 1977.



- Mannion, A.M.: Late Quaternary deposits from Linton Loch, southeast Scotland. II. The diatom assemblage of a marl core, *Journal of Biogeography* 5, 301-318, 1978.
- Mannion, A.M.: Chemical analyses of a marl core from S.E. Scotland, *Chemosphere*, 10, 495-504, 1981.
- Mannion, A.M.: Palynological evidence for lake-level changes during the Flandrian in Scotland, 1982.
- 480 Marshall, M. H., Lamb, H. F., Davies, S. J., Leng, M. J., Kubsza, Z., Umer, M., and Bryant, C.: Climatic change in northern Ethiopia during the past 17,000 years: A diatom and stable isotope record from Lake Ashenge, *Palaeogeography, Palaeoclimatology, Palaeoecology*, 279, 114–127, <https://doi.org/10.1016/j.palaeo.2009.05.003>, 2009.
- Marshall, M. H., Lamb, H. F., Huws, D., Davies, S. J., Bates, R., Bloemendal, J., Boyle, J., Leng, M. J., Umer, M., and Bryant, C.: Late Pleistocene and Holocene drought events at Lake Tana, the source of the Blue Nile, *Global and Planetary Change*, 78, 147–161, <https://doi.org/10.1016/j.gloplacha.2011.06.004>, 2011.
- 485 McGlone, M. S.: Forest destruction by early Polynesians, Lake Poukawa, Hawkes Bay, New Zealand. *Journal of the Royal Society of New Zealand* 8, 275-281, 1978.
- Melief, A. B. M., and van de Wijngaard, M. A.: The palynology of peat and lake deposits in the cordillera central: Laguna Verde de la Sietecabezas. in: "late quaternary paleoecology of the Parque Nacional Natural Los Nevados (Cordill), 1983.
- 490 Melief, A. B. M.: Late Quaternary paleoecology of the Parque Nacional Natural los Nevados (Cordillera Central), and Sumapaz (Cordillera Oriental) areas, Colombia in: the Quaternary of Colombia., volume 12, (T. van der Hammen, Ed.), 162pp, 1985.
- Melief, A.B.M. and M.A. van de Wijngaard: The palynology of peat and lake deposits in the Cordillera Central: Laguna verde de la SieteCabezas. In: "Late Quaternary paleoecology of the Parque Nacional Natural los Nevados (Cordill , 1982.
- 495 Menéndez Amor, J., Florschütz, F.: Contribución al conocimiento de la historia de la vegetación en España durante el Cuaternario, *Estudios Geológicos*, XVII, 83-99, 1961.
- Menéndez Amor, J., Florschütz, F.: Un aspect de la vegetation en Espagne meridional edurantla dernière glaciation et l'Holocène, *Geologieen Mijnbouw*, 41, 131-134, 1962.
- 500 Menéndez Amor, J., Florschütz, F.: Sur les éléments steppiques dans la végétation quaternaire de l'Espagne, *Boletín de la Real Sociedad Española de Historia Natural (Sección Geológica)*, 61, 121-133, 1963.
- Metcalf, S. E., Street-Perrott, F. A., Perrott, R. A., and Harkness, D. D.: Palaeolimnology of the Upper Lerma Basin, Central Mexico: a record of climatic change and anthropogenic disturbance since 11600 yr BP, *Journal of Paleolimnology*, 5(3), <https://doi.org/10.1007/bf00200345>, 1991.
- 505 Moernaut, J., Verschuren, D., Charlet, F., Kristen, I., Fagot, M., and De Batist, M.: The seismic-stratigraphic record of lake-level fluctuations in Lake Challa: Hydrological stability and change in equatorial East Africa over the last 140 kyr, *Earth and Planetary Science Letters*, 290, 214–223, <https://doi.org/10.1016/j.epsl.2009.12.023>, 2010.

- Newby, P. E., Killoran, P., Waldorf, M. R., Shuman, B. N., Webb, R. S., and Webb, T.: 14,000 years of sediment, vegetation, and water-level changes at the Makepeace Cedar Swamp, southeastern Massachusetts, *Quaternary Research*, 53(3), 352–68, <https://doi.org/10.1006/qres.1999.2120>, 2000.
- 510 Oeggl, K.: Beiträge zur Vegetations geschichte Tirols VII: Das Hochmoor Schwemm, *Berichte des naturwissenschaftlich-medizinischen Vereins Innsbruck*, 75, 37-60, 1988.
- Oeggl, K., Eicher, U.: Pollen- and oxygen-isotope analyses of late- and postglacial sediments from the Schwemm raised bog near Walchsee in Tirol, Austria, *Boreas*, 18, 245-253, 1989.
- 515 Pachur H.J., Wunnemann B., Zhang H.C.: Lake evolution in the Tengger Desert, Northwestern China, during the last 40000 years. *Quaternary Research* 44:171- 180, 1995.
- Payne, B. R.: Water balance of Lake Chala and its relation to groundwater from tritium and stable isotope data, *Journal of Hydrology*, 11, 47–58, [https://doi.org/10.1016/0022-1694\(70\)90114-9](https://doi.org/10.1016/0022-1694(70)90114-9), 1970.
- Peglar, S., Fritz, S.C., Alapieti, T., Saarnisto, M., Birks, H.J.B.: The composition and formation of laminated sediments in 520 Diss Mere, Norfolk, England, *Boreas*, 13, 13-28, 1984.
- Peglar, S., Fritz, S.C., Birks, H.J.: *Vegetation and land-use history at Diss, Norfolk, U.K.*, 1989.
- Placzek, C., Quade, J., and Patchett, P. J.: Geochronology and stratigraphy of late Pleistocene lake cycles on the southern Bolivian Altiplano: Implications for causes of tropical climate change, *Geological Society of America Bulletin*, 118, 515–532, <https://doi.org/10.1130/b25770.1>, 2006.
- 525 Pollard, P. H.: Water and politics: paleoecology and the centralization of the Tarascan State, Abstract, 44th International Congress of Americanists, Manchester, Pp.121-122, 1982.
- Pribyl, P. and Shuman, B. N.: A computational approach to Quaternary lake-level reconstruction applied in the central Rocky Mountains, Wyoming, USA, *Quaternary Research*, 82, 249–259, <https://doi.org/10.1016/j.yqres.2014.01.012>, 2014.
- 530 Pribyl, P. and Shuman, B. N.: A computational approach to quaternary lake-level reconstruction applied in the Central Rocky Mountains, Wyoming, USA, *Quaternary Research*, 82(1), 249–59, <https://doi.org/10.1016/j.yqres.2014.01.012>, 2017.
- Qi W., Zheng J.P.: Sedimentology of core ZK91-2 from Zabuye Lake in Tibet and the climate and environmental evolution. *Journal of Lake Sciences* 7:133-140 (in Chinese), 1995.
- 535 Renaut, R.W., Owen, R.B.: Lake Baringo, Kenya Rift Valley, and its Pleistocene Precursors. In: Gierlowski-Kordesch, E.H., Kelts, K.R. (Eds.), *Lake Basins through Space and Time: AAPG Studies in Geology*, 2000.
- Rhodes T.E., Gasse F., Lin R.F., Fontes J-C., Wei K., Berrand P., Gibert E., Melieres F., Tucholka P., Wang Z., Cheng Z.Y.: A Late Pleistocene-Holocene lacustrine record from Lake Manas, Zunggar (northern Xinjiang, western China). *Palaeogeography, Palaeoclimatology, Palaeoecology* 120: 105-121, 1996.
- 540 Roberts N.: *Late Quaternary geomorphology and palaeoecology of the Konya Basin, Turkey*, PhD thesis, London University, UK, 1980.

- Richardson, J. L., Richardson, A. E.: History of an African Rift Lake and Its Climatic Implications. *Ecol. Monogr.* 42, 499–534, 1972.
- Richardson, J. L. and Dussinger, R. A.: Paleolimnology of mid-elevation lakes in the Kenya Rift Valley, *Hydrobiologia*, 143, 167–174, <https://doi.org/10.1007/bf00026659>, 1986.
- Scholz, C.A., Rosendahl, B.R.: Low lake stands in Lake Malawi and Tanganyika East Africa, delineated with multifold seismic data. *Science*, 240, 1645–1648, 1988.
- Schmieder, J., Fritz, S. C., Grimm, E. C., Jacobs, K. C., Brown, K. J., Swinehart, J. B., and Porter, S. C.: Holocene variability in hydrology, vegetation, fire, and eolian activity in the Nebraska Sand Hills, USA, *The Holocene*, 23(4), 515–27, <https://doi.org/10.1177/0959683612463100>, 2012.
- Schmieder, J., Fritz, S. C., Swinehart, J. B., Shinneman, A. L. C., Wolfe, A. P., Miller, G., Daniels, N., Jacobs, K. C., and Grimm, E. C.: A regional-scale climate reconstruction of the last 4000 years from lakes in the Nebraska Sand Hills, USA, *Quaternary Science Reviews*, 30(13-14), 1797–1812, <https://doi.org/10.1016/j.quascirev.2011.04.011>, 2011.
- Schreve-Brinkman, E. J.: A palynological study of the upper quaternary sequence in the El Abra corridor and rock shelters (Colombia), *Palaeogeography, Palaeoclimatology, Palaeoecology*, 25(1-2), 1-109, [https://doi.org/10.1016/0031-0182\(78\)90074-3](https://doi.org/10.1016/0031-0182(78)90074-3), 1978.
- Schweger, C, Habgood, T., and Hickman M.: Late Glacial-Holocene climatic changes of Alberta: the record from lake sediment studies. in: "the impacts of climatic fluctuations on Alberta's resources and environment", Pp 47-60, 1983.
- Servant, M. and Fontes, J. C.: Les lacs quaternaires des hauts plateaux des Andes boliviennes, *Premieres interpretations paleoclimatiques, Cahiers d'orstom serie geologique*, 10, 9-23, 1978.
- Shan S.F., Kong Z.C., Du N.Q.: Lake records for climate and environments during last 20ka: Paleovegetation and changes in environments. In: Li BY (ed) *Physical environments in the Kekexili Regions, Qinghai Province*. Science Press, Beijing, pp. 197-206 (in Chinese), 1996.
- Shanahan, T. M., Overpeck, J. T., Wheeler, C. W., Beck, J. W., Pigati, J. S., Talbot, M. R., Scholz, C. A., Peck, J., and King, J. W.: Paleoclimatic variations in West Africa from a record of late Pleistocene and Holocene lake level stands of Lake Bosumtwi, Ghana, *Palaeogeogr. Palaeoclimatol. Palaeoecol.*, 242, 287–302, <https://doi.org/10.1016/j.palaeo.2006.06.007>, 2006.
- Shaw, P.A.: Late quaternary landforms and environmental change in northwest Botswana: The evidence of Lake Ngami and the Mababe Depression. *Trans. Inst. Br. Geogr.*, 1985.
- Shaw, P. A. and Cooke, H. J.: Geomorphic evidence for the late Quaternary palaeoclimates of the middle Kalahari of northern Botswana, *CATENA*, 13, 349–359, [https://doi.org/10.1016/0341-8162\(86\)90009-3](https://doi.org/10.1016/0341-8162(86)90009-3), 1986.
- Shaw, P., Thomas, D.S.G.: Lake Caprivi: a late Quaternary link between the Zambezi and middle Kalahari drainage systems. *Zeitschrift fur Geomorphologie* 32, 329-337, 1988.

- Shaw, P. A., Bateman, M. D., Thomas, D. S. G., and Davies, F.: Holocene fluctuations of Lake Ngami, Middle Kalahari: chronology and responses to climatic change, *Quaternary International*, 111, 23–35, [https://doi.org/10.1016/s1040-6182\(03\)00012-0](https://doi.org/10.1016/s1040-6182(03)00012-0), 2003.
- Shulmeister, J., Kemp, J., Fitzsimmons, K.E., Gontz, A.: Constant wind regimes during the Last Glacial Maximum and early Holocene: evidence from Little Llangothlin Lagoon, New England Tablelands, eastern Australia. *Climate of the Past*. Vol. 12, pp. 1435-1444, 2016.
- Shuman, B., Newby, P., Huang, Y. S., and Webb. T.: Evidence for the close climatic control of New England vegetation history, *Ecology* 85(5), 1297–1310, <https://doi.org/10.1890/02-0286>, 2004.
- Shuman, B., Henderson, A. K., Colman, S. M., Stone, J. R., Fritz, S. C., Stevens, L. R., Power, M. J., and Whitlock C.: Holocene Lake-Level Trends in the Rocky Mountains, U.S.A., *Quaternary Science Reviews*, 28(19-20), 1861–79, <https://doi.org/10.1016/j.quascirev.2009.03.003>, 2009.
- Shuman, B. N., Carter, G. E., Hougardy D. D., Powers, K., and Shinker, J. J.: A north-south moisture dipole at multi-century scales in the central and southern Rocky Mountains, U.S.A., during the Late Holocene, *Rocky Mountain Geology*, 49(1): 33–49, <https://doi.org/10.2113/gsrocky.49.1.33>, 2014.
- Shuman, B. N., Pribyl, P., and Buettner J.: Hydrologic changes in Colorado during the Mid-Holocene and Younger Dryas, *Quaternary Research* 84(2), 187–99, <https://doi.org/10.1016/j.yqres.2015.07.004>, 2015.
- Shuman, B. N. and Serravezza. M.: Patterns of hydroclimatic change in the Rocky Mountains and surrounding regions since the Last Glacial Maximum, *Quaternary Science Reviews* 173, 58–77, <https://doi.org/10.1016/j.quascirev.2017.08.012>, 2017.
- Sims, R.E.: The anthropogenic factor in East Anglia vegetational history: an approach using APF techniques In: Birks, H.J.B. and West, R.G. (eds), *Quaternary Plant Ecology*, Blackwell Science, 1973.
- Singh, G., Joshi, R. D., Singh, A. B.: Stratigraphic and radiocarbon evidence for the age and development of three salt lake deposits in Rajasthan, India, *Quaternary Research*, 2(4), 496–505, [https://doi.org/10.1016/0033-5894\(72\)90088-9](https://doi.org/10.1016/0033-5894(72)90088-9), 1972.
- Specht, T., Rosendahl, B.: Architecture of the Lake Malawi Rift, East Africa. *J. African Earth Sci.* 8, 355–382, 1989.
- Stager, J.C. The diatom record of Lake Victoria (East Africa): The last 17,000 years. In: Mann (ed.) *Proceedings of the Seventh International Diatom Symposium*, Philadelphia, Strauss & Cramer, pp. 455-476, 1984.
- Stager, J. C.: Environmental changes at Lake Cheshi, Zambia since 40,000 years B.P., *Quaternary Research*, 29(1), 54-65, [https://doi.org/10.1016/0033-5894\(88\)90071-3](https://doi.org/10.1016/0033-5894(88)90071-3), 1988.
- Stevenson, R. L. and Kutzbach J. E.: University of Wisconsin radiocarbon dates XXIII, *Radiocarbon*, 28(3), 1206–23, <https://doi.org/10.1017/s003382220002021x>, 1986.
- Stoffers, P. and Hecky, R. E.: Late Pleistocene–Holocene Evolution of the Kivu–Tanganyika Basin, Modern and Ancient Lake Sediments, 43–55, <https://doi.org/10.1002/9781444303698.ch3>, 1978.
- Stuiver, M., Devey, E. S., and Gjalenski, L. J.: Yale Natural Radiocarbon Measurements V, *American Journal of Science. Radiocarbon Supplement*, 2, 49–61, <https://doi.org/10.1017/s1061592x00020597>, 1960.

- Sun X.J., Du N.Q., Wong C.Y., Lin R.F., Wei K.Q.: Paleovegetation and paleoenvironment of Manasi Lake, Xinjiang, N.W. China during the last 14000 years. *Quaternary Science* 3: 239-248 (in Chinese), 1994.
- 610 Talbot, M. R. and Livingstone, D. A.: Hydrogen index and carbon isotopes of lacustrine organic matter as lake level indicators, *Palaeogeography, Palaeoclimatology, Palaeoecology*, 70, 121–137, [https://doi.org/10.1016/0031-0182\(89\)90084-9](https://doi.org/10.1016/0031-0182(89)90084-9), 1989.
- Thompson, R. S.: Late Pleistocene and Holocene environments in the Great Basin, Doctoral Dissertation, University of Arizona, 1984.
- 615 Tibby, J. and Haberle, S. G.: A late glacial to present diatom record from Lake Euramoo, wet tropics of Queensland, Australia, *Palaeogeography, Palaeoclimatology, Palaeoecology*, 251, 46–56, <https://doi.org/10.1016/j.palaeo.2007.02.017>, 2007.
- Tiercelin, J.J., Vincens, A. (eds.): Le demi-graben de Baringo–Bogoria, Rift Gregory, Kenya: 30,000 ans d’histoire hydrologique et sedimentaire. *Bull. Centres Rech. Explor.Prod. Elf-Aquitaine*, 11, 249–540, 1987.
- 620 Truckle, P. H.: Geology and late Cainozoic lake sediments of the Suguta Trough, Kenya, *Nature*, 263, 380–383, <https://doi.org/10.1038/263380a0>, 1976.
- Tyuremnov, S.N.: The age of sapropel deposits in the mid-European part of the USSR In: *Trudy Laboratorii sapropelevykh otlozhenii* (Inst. Lesa Akad Nauk SSSR), no.6, pp.40-54, 1956.
- Van Geel, B. and Van der Hammen T.: Upper Quaternary vegetation and climatic sequence of the Fuquene area (Eastern Cordillera, Colombia), *Palaeogeography, Palaeoclimatology, Palaeoecology*, 14, 9-92, 1973.
- 625 Van Zant, K.: Late glacial and post-glacial pollen and plant macro-fossils from Lake West Okoboji, northwestern Iowa, *Quaternary Research*, 12, 358-380, 1979.
- Vareschi, E.: The ecology of Lake Nakuru (Kenya), *Oecologia*, 55, 81–101, <https://doi.org/10.1007/bf00386722>, 1982.
- Verschuren, D., Sinninghe Damsté, J. S., Moernaut, J., Kristen, I., Blaauw, M., Fagot, M., and Haug, G. H.: Half-precessional dynamics of monsoon rainfall near the East African Equator, *Nature*, 462, 637–641, <https://doi.org/10.1038/nature08520>, 2009.
- 630 Vogel, J.C., Waterbolk, H.T: Groningen radiocarbon dates X, *Radiocarbon*, 14, 6-110, 1972.
- Waddington, J, C. B.: A stratigraphic record of the pollen influx to a lake in the big woods of Minnesota in *Geological Society of America Special Papers*, Geological Society of America, 263–82, <https://doi.org/10.1130/spe123-p263>, 1969.
- 635 Walker, R.: Diatom and pollen studies of a sediment profile from Melynlyn, a mountain tarn in Snowdonia, North Wales, *New Phytologist*, 81, 791-804, 1978.
- Washbourn-Kamau, C.K.: Late Quaternary Lakes in the Nakuru-Elmenteita Basin , Kenya 137, 522–535, 1971.
- Washbourn-Kamau, C. K.: Late Quaternary Shorelines of Lake Naivasha, Kenya, *Azania: Archaeological Research in Africa*, 10, 77–92, <https://doi.org/10.1080/00672707509511614>, 1975.
- 640 Waters, M. R.: “Late quaternary lacustrine history and paleoclimatic significance of pluvial Lake Cochise, southeastern Arizona, *Quaternary Research*, 32(1), 1–11, [https://doi.org/10.1016/0033-5894\(89\)90027-6](https://doi.org/10.1016/0033-5894(89)90027-6), 1989.

- Watts, W. A.: Late-Quaternary vegetation history at white pond on the inner coastal plain of South Carolina, *Quaternary Research*, 13(2), 187–99, [https://doi.org/10.1016/0033-5894\(80\)90028-9](https://doi.org/10.1016/0033-5894(80)90028-9), 1980.
- 645 Wells, S. G., Brown W. J., Enzel, Y., Anderson, R. Y., and McFadden, L. D.: late quaternary geology and paleohydrology of pluvial lake Mojave, southern California, In *Paleoenvironments and Paleohydrology of the Mojave and Southern Great Basin Deserts*, Geological Society of America, <https://doi.org/10.1130/0-8137-2368-x.79>, 2003.
- Wendorf, F., and Schild. R.: *Prehistory of the Eastern Sahara*, Academic Press, New York, 404pp., 1980.
- White, J. M. and Mathews, R. W.: Holocene vegetation and climatic change in the Peace River District, Canada, *Canadian Journal of Earth Sciences*, 19 (3), 555–70, <https://doi.org/10.1139/e82-045>, 1982.
- 650 Wilkins, D., De Deckker, P., Fifield, L.K., Gouramanis, C., Olley, J.: Comparative optical and radiocarbon dating of laminated Holocene sediments in two maar lakes: Lake Keilambete and Lake Gnotuk, south-western Victoria, Australia, *Quaternary Geochronology*, 9, 3-15, 2012.
- Williams, R.E.G., Johnson, A.S.: Birmingham University Radiocarbon Dates X. *Radiocarbon* 18, 249–267, 1976.
- Williamson, D., Jackson, M. J., Banerjee, S. K., Marvin, J., Merdaci, O., Thouveny, N., Decobert, M., Gibert-Massault, E.,  
655 Massault, M., Mazaudier, D., and Taieb, M.: Magnetic signatures of hydrological change in a tropical maar-lake (Lake Massoko, Tanzania): Preliminary results, *Physics and Chemistry of the Earth, Part A: Solid Earth and Geodesy*, 24, 799–803, [https://doi.org/10.1016/s1464-1895\(99\)00117-9](https://doi.org/10.1016/s1464-1895(99)00117-9), 1999.
- Winkler, M. G: Late-Glacial and Holocene environmental history of South-Central Wisconsin: a study of upland and wetland ecosystems, Ph.d. Thesis, University of Wisconsin-Madison, Madison, 1985.
- 660 Woodward, C., Shulmeister, J., Bell, D., Haworth, R., Jacobsen, G., Zawadzki, A.: A Holocene record of climate and hydrological changes from Little Llangothlin Lagoon, south eastern Australia. *The Holocene*. Vol. 24, no. 12, 2014.
- Wu Y.S.: The spore-pollen assemblage and its significance of pit F4 from Lop Nur area in Xinjiang. *Arid Land Geography* 17(1): 24-28 (in Chinese), 1994.
- Xu, Hai, Goldsmith Y., Lan J., Tan, L. C., Wang, X. L., Zhou, X. Y., Cheng, J., Lang, Y. C., and Liu, C. Q.: Juxtaposition of  
665 western pacific subtropical high on Asian summer monsoon shapes subtropical East Asian precipitation, *Geophysical Research Letters* 47(3). <https://doi.org/10.1029/2019gl084705>, 2020.
- Xu C. (ed): *Clay Mineral Research of Chinese Saline Lake*. Science Press, Beijing, 1-280 (in Chinese), 1993.
- Yan F.H., Ye Y.Y., Mai X.S.: Spore-pollen assemblage in the Luo 4 drilling of Lop lake in Uygur Autonomus Region of Xinjiang and its significance. *Seismology and Geology* 5(4): 75-80 (in Chinese), 1983.
- 670 Yakushko, O.F., Rachevskii, A.N., Zhukhovitskaya, A.L., Elovicheva, Ya.K., Bogdel', I.I., Vlasov, B.P.: History of the Byelorussian lakes. In: *Istoriya ozer Vostochno-Evropetskoi ravniny (Lake history of East- European Plain)*, St. Petersburg, Nauka, pp.144-167, 1992.
- Yakushko, O.F., Zhukhovitsakaya, A.L., Elovicheva, Ya.,K., Vlasov, B.P., Kurzo,B.V., Koval'ukh, N.N.: The Poles'e lacustrine zone of the East-European Plain In: *Istoriya ozer Vostochno-Evropetskoi ravniny (Lake history of East-  
675 European Plain)*, St. Petersburg, Nauka, pp.183-194, 1992.

- Yakushko, O.F.: Palaeolimnological changes on the Byelorussian territory during the late-glacial and Holocene In:  
Palaeohydrology of the temperate zone II, Lakes, Raukas, A. and Saarse, L.(Eds.), Tallinn, Valgus, pp.185- 200, 1987.
- 680 Yakushko O.F., Makhnach, N.A.: Principal stages of the Late Glacial and Holocene in the Byelorussi In:  
Problemy paleogeografi i antropogena Belorussii (Problems of Palaeogeography of Byelorussian Antropogene), Minsk,  
Nauka i Tekhnika, pp.76-94, 1973
- Young, J. A. T. and Renaut, R. W.: A radiocarbon date from Lake Bogoria, Kenya Rift Valley, *Nature*, 278(5701), 243–45,  
<https://doi.org/10.1038/278243a0>, 1979.
- Yu, Z. and J. H. McAndrews: Holocene water levels at Rice Lake, Ontario, Canada: sediment, pollen and plant-macrofossil  
evidence, *The Holocene*, 4(2), <https://doi.org/10.1177/095968369400400204>, 1994.
- 685 Zernitskaya, V.P.: The sedimentation features and spore-pollen assemblages of Vysoko-Makhnovichskii peat-section In:  
Sovremennyye rel'efoobrazuyushchie protsessy (Recent geomorphologic processes), Minsk, Nauka i Tekhnika, pp.49-54,  
1986.
- Zhang H.C., Wunnemann B.: Preliminary study on the chronology of lacustrine deposits and determination of high palaeo-  
lake level in Tengger Desert since Late Pleistocene. *Journal of Lanzhou University (Natural Sciences)* 33(2): 87- 91 (in  
690 Chinese), 1995.
- Zheng M.P., Xiang J., Wei X.J., Zheng Y.: Saline Lakes on the Qinghai-Xizang (Tibet) Plateau, 192-270. Beijing Scientific  
and Technical Publishing House, Beijing (in Chinese), 1989.
- Zheng M.P., Qi W., Wu Y.S., Liu J.Y.: Sedimentary environment and potash prospect of Lop salt lake since late Pleistocene.  
*Science Bulletin* 23: 1810-1813 (in Chinese), 1991.
- 695 Zheng X.Y., Zhang M.G., Dong J.H., Gao Z.H., Xu C., Han Z.M., Zhang B.Z., Sun D.P., Wang K.J.: Salt Lakes in Inner  
Mongolia. Science Press, Beijing, pp. 1-296 (in Chinese), 1992.
- Zheng M.P., Liu J.Y., Qi W.: Palaeoclimatic evolution of Qinghai-Tibet plateau since 40ka B.P.-Evidences from saline lake  
deposits. In: Zheng MP (ed) Saline lake resources, environment and global changes, 6-19. Geological Publishing House,  
Beijing, p 183 (in Chinese), 1996.

700

## References (pollen proxies from Table S2).

- Ager, Thomas A., and John D. Sims. 1981. "Holocene Pollen and Sediment Record from the Tangle Lakes Area, Central Alaska." *Palynology* 5 (1): 85–98. <https://doi.org/10.1080/01916122.1981.9989220>.
- 705 Albert, Bruce M. 2011. "Acidification and Pine Expansion in East Texas According to Pollen Evidence from Dual Cores in Alluvium." *Castanea* 76 (2): 164–77. <https://doi.org/10.2179/09-034.1>.
- Allen, Judy R. M., Antony J. Long, Chris J. Ottley, D. Graham Pearson, and Brian Huntley. 2007. "Holocene Climate Variability in Northernmost Europe." *Quaternary Science Reviews* 26 (9-10): 1432–53. <https://doi.org/10.1016/j.quascirev.2007.02.009>.
- 710 Almquist-Jacobson, Heather, James E. Almendinger, and Sarah Hobbie. 1992. "Influence of Terrestrial Vegetation on Sediment-Forming Processes in Kettle Lakes of West-Central Minnesota." *Quaternary Research* 38 (1): 103–16. [https://doi.org/10.1016/0033-5894\(92\)90033-f](https://doi.org/10.1016/0033-5894(92)90033-f).
- Almquist-Jacobson, Heather, and David Sanger. 1995. "Holocene Climate and Vegetation in the Milford Drainage Basin, Maine, u.s.a., and Their Implications for Human History." *Vegetation History and Archaeobotany* 4 (4). <https://doi.org/10.1007/bf00235752>.
- 715 Alwin, B. C. 1982. "Vegetation History of the Sugar Hills Area, Itasca Co., Minnesota." Unknown.
- Anderson, P. M., and A. V. Lozhkin. 2002. "Late Quaternary Vegetation and Climate of Siberia and the Russian Far East (Palynological and Radiocarbon Database)." North East Science Center.
- Anderson, R Scott, Darrell S Kaufman, Edward Berg, Caleb Schiff, and Thomas Daigle. 2016. "Holocene Biogeography of *tsuga Mertensiana* and Other Conifers in the Kenai Mountains and Prince William Sound, South-Central Alaska." *The Holocene* 27 (4): 485–95. <https://doi.org/10.1177/0959683616670217>.
- 720 Anderson, R. S. 1987. "Late-Quaternary Environments of the Sierra Nevada, California." Doctoral Dissertation. University of Arizona.
- Anderson, R. Scott, Hanna R. Soltow, and Gonzalo Jim'enez-Moreno. 2021. "Postglacial Environmental Change of a High-Elevation Forest, Sangre de Cristo Mountains of South-Central Colorado." In *From Saline to Freshwater: The Diversity of Western Lakes in Space and Time*, 221–39. Geological Society of America. [https://doi.org/10.1130/2018.2536\(13\)](https://doi.org/10.1130/2018.2536(13)).
- 725 Andreev, Andrei A, William F Manley, 'Olafur Ing'olfsson, and Steve L Forman. 2001. "Environmental Changes on Yugorski Peninsula, Kara Sea, Russia, During the Last 12,800 Radiocarbon Years." *Global and Planetary Change* 31 (1-4): 255–64. [https://doi.org/10.1016/s0921-8181\(01\)00123-0](https://doi.org/10.1016/s0921-8181(01)00123-0).
- 730 Argant, J., and A. Argant. 2000. "Mise En Evidence de l'occupation Ancienne d'un Site d'altitude: Analyse Pollinique Du Lac Du Lauzon (Drome)." *Geologie Alpine*.
- Arslanov, Kh A, L A Savelieva, V A Klimanov, S B Chernov, F E Maksimov, T V Tertychnaya, and D A Subetto. 2001. "New Data on Chronology of Landscape-Paleoclimatic Stages in Northwestern Russia During the Late Glacial and Holocene." *Radiocarbon* 43 (2B): 581–94. <https://doi.org/10.1017/s0033822200041230>.



- 735 Arslanov, Kh A, L A Saveljeva, N A Gey, V A Klimanov, S B Chernov, G M Chernova, G F Kuzmin, T V Tertychnaya, D A Subetto, and V P Denisenkov. 1999. "Chronology of Vegetation and Paleoclimatic Stages of Northwestern Russia During the Late Glacial and Holocene." *Radiocarbon* 41 (1): 25–45. <https://doi.org/10.1017/s0033822200019317>.
- Artyushenko, A. T, R. Y. Arap, and L. G. Bezusko. 1982. "Istoriya Rastitelnosti Zapadnyih Oblastey Ukrainyi v Chetvertichnom Periode." [History of Vegetation of Western Areas of Ukraine in Quaternary Period]. *Naukova Dumka*.
- 740 Axford, Yarrow, and Darrell S. Kaufman. 2004. "Late Glacial and Holocene Glacier and Vegetation Fluctuations at Little Swift Lake, Southwestern Alaska, u.s.a." *Arctic, Antarctic, and Alpine Research* 36 (2): 139–46. [https://doi.org/10.1657/1523-0430\(2004\)036\[0139:lgahga\]2.0.co;2](https://doi.org/10.1657/1523-0430(2004)036[0139:lgahga]2.0.co;2).
- Baker, Richard G., Louis J. Maher, Craig A. Chumbley, and Kent L. Van Zant. 1992. "Patterns of Holocene Environmental Change in the Midwestern United States." *Quaternary Research* 37 (3): 379–89. [https://doi.org/10.1016/0033-5894\(92\)90074-s](https://doi.org/10.1016/0033-5894(92)90074-s).
- 745 Barbier, Delphine, and Lionel Visset. 2000. "Les Spécificités dun Tardiglaciaire Armoricaïn : étude Pollinique Synthétique à Partir de Trois Tourbières Du Nord-Est Mayennais (France) [Specificities of an Armoricaïn Late Glacial Period : Synthetic Pollen Analysis of Three Peat Bogs in Northeast Mayenne (France)]." *Quaternaire* 11 (2): 99–106. <https://doi.org/10.3406/quate.2000.1659>.
- 750 Barbier, D., and L. Visset. 1997. "Logne, a Peat Bog of European Ecological Interest in the Massif Armoricaïn, Western France: Bog Development, Vegetation and Land-Use History." *Vegetation History and Archaeobotany*.
- Barnosky, C. W. 1983. "Late-Quaternary Vegetational and Climatic History of Southwestern Washington." Doctoral Dissertation. University of Washington.
- Beer, Ruth, Franziska Kaiser, Kaspar Schmidt, Brigitta Ammann, Gabriele Carraro, Ennio Grisa, and Willy Tinner. 2008. "Vegetation History of the Walnut Forests in Kyrgyzstan (Central Asia): Natural or Anthropogenic Origin?" *Quaternary Science Reviews* 27 (5-6): 621–32. <https://doi.org/10.1016/j.quascirev.2007.11.012>.
- 755 Beffa, Giorgia, Tiziana Pedrotta, Daniele Colombaroli, Paul D. Henne, Jacqueline F. N. van Leeuwen, Pascal Süssstrunk, Petra Kaltenrieder, et al. 2015. "Vegetation and Fire History of Coastal North-Eastern Sardinia (Italy) Under Changing Holocene Climates and Land Use." *Vegetation History and Archaeobotany* 25 (3): 271–89. <https://doi.org/10.1007/s00334-015-0548-5>.
- 760 Beiswenger, J. M. 1987. "Late Quaternary Vegetational History of Grays Lake, Idaho and the Ice Slough, Wyoming." Doctoral Dissertation. University of Wyoming.
- Bennett, K. D. 1987. "Holocene History of Forest Trees in Southern Ontario." *Canadian Journal of Botany* 65 (9): 1792–1801. <https://doi.org/10.1139/b87-248>.
- 765 Bennett, K. D., S. Boreham, M. J. Sharp, and V. R. Switsur. 1992. "Holocene History of Environment, Vegetation and Human Settlement on Catta Ness, Lunnasting, Shetland." *The Journal of Ecology* 80 (2): 241. <https://doi.org/10.2307/2261010>.

- Bernhardt, Christopher E., and Debra A. Willard. 2009. "Response of the Everglades Ridge and Slough Landscape to Climate Variability and 20th-Century Water Management." *Ecological Applications* 19 (7): 1723–38.  
770 <https://doi.org/10.1890/08-0779.1>.
- Bigelow, N. H. 1997. "Late-Quaternary Vegetation and Climate in Central Alaska." Doctoral Dissertation. University of Alaska.
- Birks, H. H. A. E. Bjune H. J. B. Birks, and V. A. Felde. 2012. "XXXVI International Bog ('Moor') Excursion of the Institute of Plant Sciences, University of Bern, Southern and South-Eastern Norway, 8-13 September 2012, Excursion  
775 Guide." University of Bergen.
- Birks, H. J. B. 2006. "Estimating the Amount of Compositional Change in Late-Quaternary Pollen-Stratigraphical Data." *Vegetation History and Archaeobotany* 16 (2-3): 197–202. <https://doi.org/10.1007/s00334-006-0079-1>.
- Birks, H. J. B., and W. Williams. 1983. "Late-Quaternary Vegetational History of the Inner Hebrides." *Proceedings of the Royal Society of Edinburgh. Section B. Biological Sciences* 83: 269–92. <https://doi.org/10.1017/s0269727000013452>.
- 780 Bjune, A. E., H. Seppä, and H. J. B. Birks. 2008a. "Quantitative Summer-Temperature Reconstructions for the Last 2000 Years Based on Pollen-Stratigraphical Data from Northern Fennoscandia." *Journal of Paleolimnology* 41 (1): 43–56. <https://doi.org/10.1007/s10933-008-9254-y>.
- Bjune, Anne Elisabeth. 2005a. "Holocene Vegetation History and Tree-Line Changes on a Northsouth Transect Crossing Major Climate Gradients in Southern Norwayevidence from Pollen and Plant Macrofossils in Lake Sediments." *Review  
785 of Palaeobotany and Palynology* 133 (3-4): 249–75. <https://doi.org/10.1016/j.revpalbo.2004.10.005>.
- Blake Jr, W. 1986. "Geological Survey of Canada Radiocarbon Dates XXV." Geological Survey of Canada Paper.
- Blyakharchuk, T. A. 1989a. "Istorija Rastitel'nosti Yugovostoka Zapadnoi Sibiri v Golotsene Po Dannym Botanicheskogo i Sporovo-Pyl'tsevogo Analiza Torfa [the Holocene History of Vegetation of South-Eastern West Siberia by Botanical and Pollen Analyses of Peat Deposits]." Doctoral Dissertation. Tomsk State University.
- 790 Blyakharchuk, T. A, H. E Wright, P. S Borodavko, W. O van der Knaap, and B Ammann. 2004. "Late Glacial and Holocene Vegetational Changes on the Ulagan High-Mountain Plateau, Altai Mountains, Southern Siberia." *Palaeogeography, Palaeoclimatology, Palaeoecology* 209 (1-4): 259–79. <https://doi.org/10.1016/j.palaeo.2004.02.011>.
- Bonnefille, R. 2000. "Pollen-Inferred Precipitation Time-Series from Equatorial Mountains, Africa, the Last 40 Kyr BP." *Global and Planetary Change* 26 (1-3): 25–50. [https://doi.org/10.1016/s0921-8181\(00\)00032-1](https://doi.org/10.1016/s0921-8181(00)00032-1).
- 795 Booth, Robert K., Stephen T. Jackson, and Catherine E. D. Gray. 2004. "Paleoecology and High-Resolution Paleohydrology of a Kettle Peatland in Upper Michigan." *Quaternary Research* 61 (1): 1–13. <https://doi.org/10.1016/j.yqres.2003.07.013>.
- Bottema, S. 1988. "A Reconstruction of the Halos Environment on the Basis of Palynological Information." In: *New Halos: A Hellenistic Town in Thessalia*.
- 800 Bozilova, Elissaveta, and Hans-Jorgen Beug. 1994. "Studies on the Vegetation History of Lake Varna Region, Northern Black Sea Coastal Area of Bulgaria." *Vegetation History and Archaeobotany* 3 (3). <https://doi.org/10.1007/bf00202022>.

- Bozilova, Elissaveta, and Spassimir Tonkov. 1985a. "Vegetation Development in the Mountainous Areas of Southwestern Bulgaria. I. Palynological Investigations and Reconstruction of Past Vegetation." *Ecologia Mediterranea* 11 (1): 33–37. <https://doi.org/10.3406/ecmed.1985.1068>.
- 805 Brown, K. J., R. J. Fitton, G. Schoups, G. B. Allen, K. A. Wahl, and R. J. Hebda. 2006. "Holocene Precipitation in the Coastal Temperate Rainforest Complex of Southern British Columbia, Canada." *Quaternary Science Reviews* 25 (21-22): 2762–79. <https://doi.org/10.1016/j.quascirev.2006.02.020>.
- Brown, KJ, NJR Hebda, G Schoups, N Conder, KAP Smith, and JA Trofymow. 2019. "Long-Term Climate, Vegetation and Fire Regime Change in a Managed Municipal Water Supply Area, British Columbia, Canada." *The Holocene* 29 (9): 810 1411–24. <https://doi.org/10.1177/0959683619854523>.
- Brubaker, Linda B. 1975. "Postglacial Forest Patterns Associated with till and Outwash in Northcentral Upper Michigan." *Quaternary Research* 5 (4): 499–527. [https://doi.org/10.1016/0033-5894\(75\)90013-7](https://doi.org/10.1016/0033-5894(75)90013-7).
- Brubaker, Linda B., Harriet L. Garfinkel, and Mary E. Edwards. 1983. "A Late Wisconsin and Holocene Vegetation History from the Central Brooks Range: Implications for Alaskan Palaeoecology." *Quaternary Research* 20 (2): 194–214. 815 [https://doi.org/10.1016/0033-5894\(83\)90077-7](https://doi.org/10.1016/0033-5894(83)90077-7).
- Calcote, Randy. 2003. "Mid-Holocene Climate and the Hemlock Decline: The Range Limit of *Tsuga Canadensis* in the Western Great Lakes Region, USA." *The Holocene* 13 (2): 215–24. <https://doi.org/10.1191/0959683603hl608rp>.
- Calder, W. J. 2016. "Interactions Among Climate Change, Wildfire, and Vegetation Shaping Landscapes for the Last 2000 Years." Doctoral Dissertation. University of Wyoming.
- 820 Camill, Philip, Charles E. Umbanhowar, Rebecca Teed, Christoph E. Geiss, Jessica Aldinger, Leah Dvorak, Jon Kenning, Jacob Limmer, and Kristina Walkup. 2003. "Late-Glacial and Holocene Climatic Effects on Fire and Vegetation Dynamics at the Prairie-Forest Ecotone in South-Central Minnesota." *Journal of Ecology* 91 (5): 822–36. <https://doi.org/10.1046/j.1365-2745.2003.00812.x>.
- Camuera, Jon, Mar. Ramos-Rom'an, Gonzalo Jim'enez-Moreno, Antonio Garc-Alix, Liisa Ilvonen, Leena Ruha, Graciela 825 Gil-Romera, Pen'elope Gonz'alez-Samp'eriz, and Heikki Seppä. 2022. "Past 200 Kyr Hydroclimate Variability in the Western Mediterranean and Its Connection to the African Humid Periods." *Scientific Reports* 12 (1). <https://doi.org/10.1038/s41598-022-12047-1>.
- Cao, Xianyong, Qinghai Xu, Zhichun Jing, Jigen Tang, Yuecong Li, and Fang Tian. 2010. "Holocene Climate Change and Human Impacts Implied from the Pollen Records in Anyang, Central China." *Quaternary International* 227 (1): 3–9. 830 <https://doi.org/10.1016/j.quaint.2010.03.019>.
- Carcaud, N, M Garcin, L Visset, J. Musch, and J. Burnouf. 2002. "Nouvelle Lecture de l'évolution Des Paysages Fluviaux a l'holocene Dans Le Bassin de La Loire Moyenne." *Les Fleuves Ont Une Histoire*.
- Carter, Vachel A., Andrea Brunelle, Thomas A. Minckley, John D. Shaw, R. Justin DeRose, and Simon Brewer. 2017. "Climate Variability and Fire Effects on Quaking Aspen in the Central Rocky Mountains, USA." *Journal of* 835 *Biogeography* 44 (6): 1280–93. <https://doi.org/10.1111/jbi.12932>.

- Chen, Fa-Hu, Bo Cheng, Yan Zhao, Yan Zhu, and David B. Madsen. 2006. "Holocene Environmental Change Inferred from a High-Resolution Pollen Record, Lake Zhuyeze, Arid China." *The Holocene* 16 (5): 675–84.  
<https://doi.org/10.1191/0959683606hl951rp>.
- 840 Chen, Fahu, Zicheng Yu, Meilin Yang, Emi Ito, Sumin Wang, David B. Madsen, Xiaozhong Huang, et al. 2008. "Holocene Moisture Evolution in Arid Central Asia and Its Out-of-Phase Relationship with Asian Monsoon History." *Quaternary Science Reviews* 27 (3-4): 351–64. <https://doi.org/10.1016/j.quascirev.2007.10.017>.
- Chen, Fahu, Jifeng Zhang, Jianbao Liu, Xianyong Cao, Juzhi Hou, Liping Zhu, Xiangke Xu, et al. 2020. "Climate Change, Vegetation History, and Landscape Responses on the Tibetan Plateau During the Holocene: A Comprehensive Review." *Quaternary Science Reviews* 243 (September): 106444. <https://doi.org/10.1016/j.quascirev.2020.106444>.
- 845 Chen, Sang, Sharon S. Hoffmann, David C. Lund, Kim M. Cobb, Julien Emile-Geay, and Jess F. Adkins. 2016. "A High-Resolution Speleothem Record of Western Equatorial Pacific Rainfall: Implications for Holocene ENSO Evolution." *Earth and Planetary Science Letters* 442 (May): 61–71. <https://doi.org/10.1016/j.epsl.2016.02.050>.
- Ciesla, A, M. Ralska-Jasiewiczowa, and E. Stupnicka. 1977. "Paleobotanical and Geochemical Investigations of the Lacustrine Deposits at Woryty Near Olsztyn (Northeastern Poland)." *Polskie Archiwum Hydrobiologii*.
- 850 Clark, James S., P. Daniel Royall, and Craig Chumbley. 1996. "The Role of Fire During Climate Change in an Eastern Deciduous Forest at Devils Bathtub, New York." *Ecology* 77 (7): 2148–66. <https://doi.org/10.2307/2265709>.
- Colombaroli, Daniele, Willy Tinner, Jacqueline van Leeuwen, Roland Noti, Elisa Vescovi, Boris Vanni'ere, Michel Magny, Roland Schmidt, and Harald Bugmann. 2009. "Response of Broadleaved Evergreen Mediterranean Forest Vegetation to Fire Disturbance During the Holocene: Insights from the Peri-Adriatic Region." *Journal of Biogeography* 36 (2): 314–  
855 26. <https://doi.org/10.1111/j.1365-2699.2008.01987.x>.
- Comtois, Paul. 1982. "Histoire Holocène Du Climat Et de La végétation à Lanoraie (Québec)." *Canadian Journal of Earth Sciences* 19 (10): 1938–52. <https://doi.org/10.1139/e82-172>.
- Cwynar, Les C. 1990. "A Late Quaternary Vegetation History from Lily Lake, Chilkat Peninsula, Southeast Alaska." *Canadian Journal of Botany* 68 (5): 1106–12. <https://doi.org/10.1139/b90-139>.
- 860 Cyprien, A. L. 2001. "Chronologie de l'interaction de l'homme Et Du Milieu Dans l'espace Central Et Aval de La Loire (Ouest de La France)." Doctoral Dissertation. Université de Nantes.
- Cyprien, A. L., and L. Visset. 2006. "Etude Palynologique Du Sondage Parcay 1 (Vallée de La Vienne)." *Rapport Préliminaire*. 10.
- Davies, F. M. 1997. "Holocene Palaeoenvironmental Studies in the Oban Region, Western Scotland, Upon Tyne." Doctoral  
865 Dissertation. Department of Geography.
- Davis, Margaret B. 1967. "Pollen Accumulation Rates at Rogers Lake, Connecticut, During Late- and Postglacial Time." *Review of Palaeobotany and Palynology* 2 (1-4): 219–30. [https://doi.org/10.1016/0034-6667\(67\)90150-9](https://doi.org/10.1016/0034-6667(67)90150-9).
- Davis, Margaret B., Mark W. Schwartz, and Kerry Woods. 1991. "Detecting a Species Limit from Pollen in Sediments." *Journal of Biogeography* 18 (6): 653. <https://doi.org/10.2307/2845547>.

- 870 Davis, Owen K. 1992. "Rapid Climatic Change in Coastal Southern California Inferred from Pollen Analysis of San Joaquin Marsh." *Quaternary Research* 37 (1): 89–100. [https://doi.org/10.1016/0033-5894\(92\)90008-7](https://doi.org/10.1016/0033-5894(92)90008-7).
- Davis, Owen K. 1999. "Pollen Analysis of a Late-Glacial and Holocene Sediment Core from Mono Lake, Mono County, California." *Quaternary Research* 52 (2): 243–49. <https://doi.org/10.1006/qres.1999.2063>.
- Davis, Owen K., John C. Sheppard, and Susan Robertson. 1986. "Contrasting Climatic Histories for the Snake River Plain, 875 Idaho, Resulting from Multiple Thermal Maxima." *Quaternary Research* 26 (3): 321–39. [https://doi.org/10.1016/0033-5894\(86\)90093-1](https://doi.org/10.1016/0033-5894(86)90093-1).
- de Beaulieu, J. L. 1977. "Contribution Pollenanalytique a l'histoire Tardiglaciaire Et Holocene de La Vegetation Des Alpes Meridionales Francaises." Doctoral Dissertation. Universite d'Aix-Marseille.
- Deforce, K. 2011. "Middle and Late Holocene Vegetation and Landscape Evolution of the Scheldt Estuary: A Palynological 880 Study of a Peat Deposit from Doel (Belgium)." *Geologica Belgica*.
- Dinel, H., P. J. H. Richard, P. E. M. Lev'esque, and A. Larouche. 1986. "Origine Et évolution Du Marais Tourbeux de Keswick, Ontario, Par l'analyse Pollinique Et Macrofossile." *Canadian Journal of Earth Sciences* 23 (8): 1145–55. <https://doi.org/10.1139/e86-113>.
- Ding, Wei, Qinghai Xu, and Pavel E. Tarasov. 2017. "Examining Bias in Pollen-Based Quantitative Climate Reconstructions 885 Induced by Human Impact on Vegetation in China." *Climate of the Past* 13 (9): 1285–1300. <https://doi.org/10.5194/cp-13-1285-2017>.
- Diot, Marie-Françoise, and Jean-Pierre Tastet. 1995. "Paléo-Environnements Holocènes Et Limites Chronoclimatiques Enregistrés Dans Un Marais Estuarien de La Gironde (France) [ Holocene Paleo-Environments and Chrono-Climatic Limits Recorded in a Reclaimed Marsh of the Gironde Estuary (France).]" *Quaternaire* 6 (2): 63–75. 890 <https://doi.org/10.3406/quate.1995.2039>.
- Edwards, Mary, Leanne Franklin-Smith, Charlotte Clarke, Joanna Baker, Sian Hill, and Katherine Gallagher. 2014. "The Role of Fire in the Mid-Holocene Arrival and Expansion of Lodgepole Pine (*pinus Contorta latifolia* Engelm. Ex s. Watson) in Yukon, Canada." *The Holocene* 25 (1): 64–78. <https://doi.org/10.1177/0959683614556389>.
- Efremov, Y. V., and E. V. Kvavadze. 1995. "Caucasus." In: *The History of Lakes of Mountain Ranges in Northern Asia* 895 (Pp.190-206). Nauka.
- Eisner, Wendy R., Torbjörn E. Törnqvist, Eduard A. Koster, Ole Bennike, and Jacqueline F. N. van Leeuwen. 1995. "Paleoecological Studies of a Holocene Lacustrine Record from the Kangerlussuaq (søndre Strømfjord) Region of West Greenland." *Quaternary Research* 43 (1): 55–66. <https://doi.org/10.1006/qres.1995.1006>.
- Elina, G. A. 1981. "Printsipy i Metody Rekonstruktsii i Kartirovaniya Rastitelonosti Golotsena [Principles and Methods for 900 Reconstruction and Mapping of Holocene Vegetation]." Nauka.
- Elovicheva, Y. K., and I. I. Bogdel. 1985. "Novye Razrezy Golosena Belarusi [New Holocene Sections of Byelorussia]." In: *Geologicheskoe Stroenie Osadochnoi Tolshchi Belorussii [Geological Composition of Sedimentary Sequence of Byelorussia]*.

- Engel, Zbyněk, Daniel Nývlt, Marek Křiváček, Václav Treml, Vlasta Jankovská, and Lenka Lisá. 2010. “Sedimentary Evidence of Landscape and Climate History Since the End of MIS 3 in the Krkonoše Mountains, Czech Republic.” *Quaternary Science Reviews* 29 (7-8): 913–27. <https://doi.org/10.1016/j.quascirev.2009.12.008>.
- Evans, N. S. 2002. “An Investigation of the Holocene Pollen Record from the Grey Islands, Newfoundland.” Master’s Thesis. Memorial University of Newfoundland.
- Ewing, H. A. 2000. “Ecosystem Development and Response to Climatic Change: A Comparative Study of Forest-Lake Ecosystems on Different Substrates.” Doctoral Dissertation. University of Minnesota.
- Farcas, Sorina, Jacques-Louis de Beaulieu, Maurice Reille, George Coldea, Baluta Diaconeasa, Claude Goeury, Thomas Goslar, and Timothy Jull. 1999. “First 14C Datings of Late Glacial and Holocene Pollen Sequences from Romanian Carpathes.” *Comptes Rendus de l’Académie Des Sciences - Series III - Sciences de La Vie* 322 (9): 799–807. [https://doi.org/10.1016/s0764-4469\(00\)80039-6](https://doi.org/10.1016/s0764-4469(00)80039-6).
- Fauquette, S’everine, Joël Guiot, Marianne Menut, Jacques-Louis de Beaulieu, Maurice Reille, and Pascal Guenet. 1999. “Vegetation and Climate Since the Last Interglacial in the Vienne Area (France).” *Global and Planetary Change* 20 (1): 1–17. [https://doi.org/10.1016/s0921-8181\(98\)00054-x](https://doi.org/10.1016/s0921-8181(98)00054-x).
- Filipova-Marinova, Mariana, Danail Pavlov, Marco Coolen, Liviu Giosan, and Stoyan Vergiev. 2014. “Contributions to the European Pollen Database. 22. Vegetation Development in the Central Part of the Bulgarian Black Sea Coast During the Last 13 000 Years.” *Grana* 53 (3): 249–51. <https://doi.org/10.1080/00173134.2014.903294>.
- Finsinger, Walter, and Willy Tinner. 2007. “Pollen and Plant Macrofossils at Lac de Fully (2135 m a.s.l.): Holocene Forest Dynamics on a Highland Plateau in the Valais, Switzerland.” *The Holocene* 17 (8): 1119–27. <https://doi.org/10.1177/0959683607082552>.
- Finsinger, Walter, Quentin Vanel, Adriano Ribolini, and Willy Tinner. 2020. “Early to Late Holocene Vegetation and Fire Dynamics at the Treeline in the Maritime Alps.” *Vegetation History and Archaeobotany* 30 (4): 507–24. <https://doi.org/10.1007/s00334-020-00795-x>.
- Fossitt, J. A. 1994. “Late-Glacial and Holocene Vegetation History of Western Donegal, Ireland.” *Biology and Environment: Proceedings of the Royal Irish Academy*.
- Foster, D. R., and T. M. Zebryk. 1993. “Long-Term Vegetation Dynamics and Disturbance History of a Tsuga-Dominated Forest in New England.” *Ecology* 74 (4): 982–98. <https://doi.org/10.2307/1940468>.
- Fuller, J. L. 1995. “Holocene Forest Dynamics in Southern Ontario, Canada.” Doctoral Dissertation. University of Cambridge.
- Fyfe, R. M., A. G. Brown, and S. J. Rippon. 2003. “Mid- to Late-Holocene Vegetation History of Greater Exmoor, UK: Estimating the Spatial Extent of Human-Induced Vegetation Change.” *Vegetation History and Archaeobotany* 12 (4): 215–32. <https://doi.org/10.1007/s00334-003-0018-3>.
- Gajewski, K., and Silvina Garralla. 1992. “Holocene Vegetation Histories from Three Sites in the Tundra of Northwestern Quebec, Canada.” *Arctic and Alpine Research* 24 (4): 329. <https://doi.org/10.2307/1551288>.

- Gajewski, K., S. Payette, and J. C. Ritchie. 1993. "Holocene Vegetation History at the Boreal-Forest-Shrub-Tundra Transition in North-Western Quebec." *The Journal of Ecology* 81 (3): 433. <https://doi.org/10.2307/2261522>.
- 940 Gandouin, E. 2002. "Enregistrement Paleoclimatique de La Transgression Holocene: Signature Paleo-Environnementale Des Chironomidae (Dipteres) Du Bassin de Saint-Omer (France)." Doctoral Dissertation. Universite de Lille.
- Garralla, S. 1991. "L'analyse Pollinique Des Sediments d'un Lac de La Region de Chibougamau, Quebec." Master's Thesis. Universite Laval.
- Gaudreau, D. C. 1986. "Late-Quaternary Vegetational History of the Northeast: Paleoecological Implications of Topographic Patterns in Pollen Distributions." Doctoral Dissertation. Yale University.
- 945 Gavin, Daniel G., Feng Sheng Hu, Kenneth Lertzman, and Peter Corbett. 2006. "Weak climatic control of stand-scale fire history during the late Holocene." *Ecology* 87 (7): 1722–32. [https://doi.org/10.1890/0012-9658\(2006\)87\[1722:wccosf\]2.0.co;2](https://doi.org/10.1890/0012-9658(2006)87[1722:wccosf]2.0.co;2).
- Gavin, Daniel G., Feng Sheng Hu, Ian R. Walker, and Karlyn Westover. 2009. "The Northern Inland Temperate Rainforest of British Columbia: Old Forests with a Young History?" *Northwest Science* 83 (1): 70–78. <https://doi.org/10.3955/046.083.0107>.
- 950 Giesecke, Thomas. 2005. "Holocene Forest Development in the Central Scandes Mountains, Sweden." *Vegetation History and Archaeobotany* 14 (2): 133–47. <https://doi.org/10.1007/s00334-005-0070-2>.
- Glaser, Paul H., Barbara C. S. Hansen, Joe J. Donovan, Thomas J. Givnish, Craig A. Stricker, and John C. Volin. 2013. "Holocene Dynamics of the Florida Everglades with Respect to Climate, Dustfall, and Tropical Storms." *Proceedings of the National Academy of Sciences* 110 (43): 17211–16. <https://doi.org/10.1073/pnas.1222239110>.
- 955 GLASER, PAUL H., BARBARA C. S. HANSEN, DONALD I. SIEGEL, ANDREW S. REEVE, and PAUL J. MORIN. 2004. "Rates, Pathways and Drivers for Peatland Development in the Hudson Bay Lowlands, Northern Ontario, Canada." *Journal of Ecology* 92 (6): 1036–53. <https://doi.org/10.1111/j.0022-0477.2004.00931.x>.
- 960 Gobet, Erika, Willy Tinner, Christian Bigler, Peter A. Hochuli, and Brigitta Ammann. 2005. "Early-Holocene Afforestation Processes in the Lower Subalpine Belt of the Central Swiss Alps as Inferred from Macrofossil and Pollen Records." *The Holocene* 15 (5): 672–86. <https://doi.org/10.1191/0959683605h1843rp>.
- Goransson, H. 1989. "Dags Mosse: Ostergotlands Forhistoriska Kalender." *Svensk Botanisk Tidskrift*.
- Grimm, E. C. 1981. "An Ecological and Paleoecological Study of the Vegetation in the Big Woods Region of Minnesota." Doctoral Dissertation. University of Minnesota.
- 965 Harmata, K. 1995. "A Late Glacial and Early Holocene Profile from Jaslo and a Recapitulation of the Studies on the Vegetational History of the Jaslo-Sanok Depression in the Last 13 000 Years." *Acta Palaeobotanica*.
- Heinrichs, Markus L, Richard J Hebda, Ian R Walker, and Samantha L Palmer. 2002. "Postglacial Paleoecology and Inferred Paleoclimate in the Engelmann Sprucesubalpine Fir Forest of South-Central British Columbia, Canada." *Palaeogeography, Palaeoclimatology, Palaeoecology* 184 (3-4): 347–69. [https://doi.org/10.1016/s0031-0182\(02\)00274-2](https://doi.org/10.1016/s0031-0182(02)00274-2).
- 970

- Herzschuh, Ulrike, Katja Winter, Bernd Wünnemann, and Shijie Li. 2006. "A General Cooling Trend on the Central Tibetan Plateau Throughout the Holocene Recorded by the Lake Zigetang Pollen Spectra." *Quaternary International* 154-155 (October): 113–21. <https://doi.org/10.1016/j.quaint.2006.02.005>.
- 975 Huang, C. Q, Z. D Feng, Y. Z Ma, L. L. Guo, and W. Wang. 2009. "Holocene Palaeoenvironment Changes Recorded by Pollen of Baahar Nuur Lake." *Journal of Lanzhou University (Natural Sciences)*.
- Hyvärinen, Hannu. 2008a. "Flandrian Pollen Deposition Rates and Tree-Line History in Northern Fennoscandia." *Boreas* 5 (3): 163–75. <https://doi.org/10.1111/j.1502-3885.1976.tb00260.x>.
- Jahns, S. 1999. "Pollen Analysis Studies at the Grosser Krebssee, East Brandenburg." *Germania*.
- 980 Jahns, Susanne. 2000. "Late-Glacial and Holocene Woodland Dynamics and Land-Use History of the Lower Oder Valley, North-Eastern Germany, Based on Two, AMS14C-Dated, Pollen Profiles." *Vegetation History and Archaeobotany* 9 (2): 111–23. <https://doi.org/10.1007/bf01300061>.
- Jahns, Susanne. 2004. "The Holocene History of Vegetation and Settlement at the Coastal Site of Lake Voukaria in Acarnania, Western Greece." *Vegetation History and Archaeobotany* 14 (1): 55–66. [https://doi.org/10.1007/s00334-004-](https://doi.org/10.1007/s00334-004-0053-8)  
985 0053-8.
- Jett'e, H'el'ene, and Pierre J. H. Richard. 2007. "Contribution à l'histoire Postglaciaire de La végétation En Gaspésie méridionale, Québec." *Géographie Physique Et Quaternaire* 46 (3): 273–84. <https://doi.org/10.7202/032914ar>.
- Jiang, Wenying, Zhengtang Guo, Xiangjun Sun, Haibin Wu, Guoqiang Chu, Baoyin Yuan, Chritine Hatt'e, and Jöel Guiot. 2006. "Reconstruction of Climate and Vegetation Changes of Lake Bayanchagan (Inner Mongolia): Holocene  
990 Variability of the East Asian Monsoon." *Quaternary Research* 65 (3): 411–20. <https://doi.org/10.1016/j.yqres.2005.10.007>.
- Jiang, Wenying, Suzanne A. G. Leroy, Shiling Yang, Enlou Zhang, Luo Wang, Xiaoxiao Yang, and Patrick Rioual. 2019. "Synchronous Strengthening of the Indian and East Asian Monsoons in Response to Global Warming Since the Last Deglaciation." *Geophysical Research Letters* 46 (7): 3944–52. <https://doi.org/10.1029/2019gl082084>.
- 995 Jiang, XiuYang, YaoQi He, ChuanChou Shen, XingGong Kong, ZhiZhong Li, and YuWei Chang. 2011. "Stalagmite-Inferred Holocene Precipitation in Northern Guizhou Province, China, and Asynchronous Termination of the Climatic Optimum in the Asian Monsoon Territory." *Chinese Science Bulletin* 57 (7): 795–801. [https://doi.org/10.1007/s11434-](https://doi.org/10.1007/s11434-011-4848-6)  
011-4848-6.
- Jim'enez-Moreno, Gonzalo, Peter J. Fawcett, and R. Scott Anderson. 2008. "Millennial- and Centennial-Scale Vegetation and Climate Changes During the Late Pleistocene and Holocene from Northern New Mexico (USA)." *Quaternary Science Reviews* 27 (13-14): 1442–52. <https://doi.org/10.1016/j.quascirev.2008.04.004>.
- 1000 Johansen, J. 1982. "Vegetational Development in the Faroes from 10 Kyr BP to the Present." *Danmarks Geologiske Undersogelser Arbog*.
- Joly, C. 2006. "Histoire de La Vegetation Dans l'espace Centre-Ouest Atlantique (France) : Relations Societes/Vegetation Et  
1005 Evolution Du Trait de Cote Depuis Le Mesolithique Recent-Final." *Doctoral Dissertation*. Universite de Nantes.



- Juhasz, I. 2002. "Reconstitution Palynologique de La Vegetation Depuis Le Tardiglaciaire Dans La Region de Zala, Sud-Est de La Hongrie." [Palynological Reconstruction of the Lateglacial and Holocene Vegetation in South-West Hungary]. Doctoral Dissertation. University of Aix-Marseille III (Marseille).
- 1010 Kabailiene, M. K. 1986. "Methods of Pollen and Spores Analysis." In: *Istoriya Ozior v SSSR* (Pp.91-94). Tallin.
- King, G. A. 1986. "Deglaciation and Vegetation History of Western Labrador and Adjacent Quebec." Unknown.
- King, James E. 1981. "Late Quaternary Vegetational History of Illinois." *Ecological Monographs* 51 (1): 43–62.  
<https://doi.org/10.2307/2937306>.
- 1015 KORHOLA, A, K VASKO, H TOIVONEN, and H OLANDER. 2002. "Holocene Temperature Changes in Northern Fennoscandia Reconstructed from Chironomids Using Bayesian Modelling." *Quaternary Science Reviews* 21 (16-17): 1841–60. [https://doi.org/10.1016/s0277-3791\(02\)00003-3](https://doi.org/10.1016/s0277-3791(02)00003-3).
- Krause, Teresa R., Yanbin Lu, Cathy Whitlock, Sherilyn C. Fritz, and Kenneth L. Pierce. 2015. "Patterns of Terrestrial and Limnologic Development in the Northern Greater Yellowstone Ecosystem (USA) During the Late-Glacial/Early-Holocene Transition." *Palaeogeography, Palaeoclimatology, Palaeoecology* 422 (March): 46–56.  
<https://doi.org/10.1016/j.palaeo.2014.12.018>.
- 1020 Kremenetski, K. V, O. K. Borisova, and E. M. Zelikson. 2000. "The Late Glacial and Holocene History of Vegetation in the Moscow Region." *Palaeontological Journal*.
- Kuhl, N. 1998. "Pollenanalytische Untersuchungen Zur Vegetations- Und Siedlungsgeschichte in Einem Kesselmoor Bei Drangstedt, Ldkr." Cuxhaven. Probleme Der Küstenforschung Im Südlichen Nordseegebiet.
- 1025 Labelle, Claude, and Pierre J. H. Richard. 2007. "Histoire Postglaciaire de La végétation Dans La région de Mont-Saint-Pierre, Gaspésie, Québec." *Géographie Physique Et Quaternaire* 38 (3): 257–74. <https://doi.org/10.7202/032567ar>.
- Lacourse, Terri, Kyle W. Beer, Kira B. Craig, and Dante Canil. 2019. "Postglacial Wetland Succession, Carbon Accumulation, and Forest Dynamics on the East Coast of Vancouver Island, British Columbia, Canada." *Quaternary Research* 92 (1): 232–45. <https://doi.org/10.1017/qua.2018.146>.
- 1030 Lacourse, Terri, Rolf W. Mathewes, and Daryl W. Fedje. 2005. "Late-Glacial Vegetation Dynamics of the Queen Charlotte Islands and Adjacent Continental Shelf, British Columbia, Canada." *Palaeogeography, Palaeoclimatology, Palaeoecology* 226 (1-2): 36–57. <https://doi.org/10.1016/j.palaeo.2005.05.003>.
- Laird, K. R. 1996. "A High-Resolution Paleoclimatic Record of a Closed-Basin Lake in the Northern Great Plains." Doctoral Dissertation. University of Minnesota.
- 1035 Leipe, Christian, Dieter Demske, and Pavel E. Tarasov. 2014. "A Holocene Pollen Record from the Northwestern Himalayan Lake Tso Moriri: Implications for Palaeoclimatic and Archaeological Research." *Quaternary International* 348 (October): 93–112. <https://doi.org/10.1016/j.quaint.2013.05.005>.
- Leipe, Christian, Norio Kito, Yumi Sakaguchi, and Pavel E. Tarasov. 2013. "Vegetation and Climate History of Northern Japan Inferred from the 5500-Year Pollen Record from the Oshima Peninsula, SW Hokkaido." *Quaternary International* 290-291 (March): 151–63. <https://doi.org/10.1016/j.quaint.2012.07.014>.

- 1040 Leroy, Suzanne A. G., Ata A. Kakroodi, Salomon Kroonenberg, Hamid K. Lahijani, Habib Alimohammadian, and Aman Nigarov. 2013. "Holocene Vegetation History and Sea Level Changes in the SE Corner of the Caspian Sea: Relevance to SW Asia Climate." *Quaternary Science Reviews* 70 (June): 28–47. <https://doi.org/10.1016/j.quascirev.2013.03.004>.
- Lespez, Laurent, Martine Clet-Pellerin, Robert Davidson, Guillaume Hermier, Vincent Carpentier, and Jean-Michel Cadot. 2010. "Middle to Late Holocene Landscape Changes and Geoarchaeological Implications in the Marshes of the Dives Estuary (NW France)." *Quaternary International* 216 (1-2): 23–40. <https://doi.org/10.1016/j.quaint.2009.06.018>.
- 1045 Li, Jianyong, and Ninglian Wang. 2020. "Holocene Grassland Fire Dynamics and Forcing Factors in Continental Interior of China." *Geophysical Research Letters* 47 (13). <https://doi.org/10.1029/2020gl088049>.
- Li, Ting-Yong, Chuan-Chou Shen, Hong-Chun Li, Jun-Yun Li, Hong-Wei Chiang, Sheng-Rong Song, Dao-Xian Yuan, et al. 2011. "Oxygen and Carbon Isotopic Systematics of Aragonite Speleothems and Water in Furong Cave, Chongqing, China." *Geochimica Et Cosmochimica Acta* 75 (15): 4140–56. <https://doi.org/10.1016/j.gca.2011.04.003>.
- 1050 Li, TingYong, DaoXian Yuan, HongChun Li, Yan Yang, JianLi Wang, XinYa Wang, JunYun Li, JiaMing Qin, MeiLiang Zhang, and YuShi Lin. 2007. "High-Resolution Climate Variability of Southwest China During 5770 Ka Reflected in a Stalagmite  $\delta$  18O Record from Xinya Cave." *Science in China Series D: Earth Sciences* 50 (8): 1202–8. <https://doi.org/10.1007/s11430-007-0059-z>.
- 1055 Liu, G. X. 1991. "Late-Glacial and Postglacial Vegetation and Association Environment in Jiangnan Plain." *Acta Botanica Sinica*.
- Long, Colin J., and Cathy Whitlock. 2002. "Fire and Vegetation History from the Coastal Rain Forest of the Western Oregon Coast Range." *Quaternary Research* 58 (3): 215–25. <https://doi.org/10.1006/qres.2002.2378>.
- 1060 Lotter, A. F., and J. Fischer. 1991. "Vegetation Und Flora Im Gebiet Des Aegelsees (Berner Oberland) Im Wandel Der Zeit: Vergangenheit, Gegenwart Und Zukunft." *Mitteilungen Der Naturforschenden Gesellschaft Bern NF*.
- MacDonald, G. M. 1983. "Holocene Vegetation History of the Upper Natla River Area, Northwest Territories, Canada." *Arctic and Alpine Research* 15 (2): 169. <https://doi.org/10.2307/1550919>.
- MacDonald, G. M. 1984. "Postglacial Plant Migration and Vegetation Development in the Western Canadian Boreal Forest." 1065 Doctoral Dissertation. University of Toronto.
- Maenza-Gmelch, Terryanne E. 1997. "Holocene Vegetation, Climate, and Fire History of the Hudson Highlands, Southeastern New York, USA." *The Holocene* 7 (1): 25–37. <https://doi.org/10.1177/095968369700700103>.
- Maher Jr, L. J. 1973. "Pollen Evidence Suggests That Climatic Changes in the Colorado Rockies During the Last 5000 Years Were Out of Phase with Those in the Northeastern United States." In: Abstracts.
- 1070 Marsicek, Jeremiah P., Bryan Shuman, Simon Brewer, David R. Foster, and W. Wyatt Oswald. 2013. "Moisture and Temperature Changes Associated with the Mid-Holocene Tsuga Decline in the Northeastern United States." *Quaternary Science Reviews* 80 (November): 129–42. <https://doi.org/10.1016/j.quascirev.2013.09.001>.

- McAndrews, J. H. 1981. "Late Quaternary Climate of Ontario: Temperature Trends from the Fossil Pollen Record." In: Quaternary Paleoclimate Ed. By W.C. Mahaney (Pp.319-333). Geo Abstracts.
- 1075 McAndrews, John H. 1969. "Paleobotany of a Wild Rice Lake in Minnesota." *Canadian Journal of Botany* 47 (11): 1671–79. <https://doi.org/10.1139/b69-243>.
- Mensing, Scott, Jeremy Smith, Kelly Burkle Norman, and Marie Allan. 2008. "Extended Drought in the Great Basin of Western North America in the Last Two Millennia Reconstructed from Pollen Records." *Quaternary International* 188 (1): 79–89. <https://doi.org/10.1016/j.quaint.2007.06.009>.
- 1080 Miller, Gifford H., Alexander P. Wolfe, Jason P. Briner, Peter E. Sauer, and Atle Nesje. 2005. "Holocene Glaciation and Climate Evolution of Baffin Island, Arctic Canada." *Quaternary Science Reviews* 24 (14-15): 1703–21. <https://doi.org/10.1016/j.quascirev.2004.06.021>.
- Miller, N. G., and R. P. Futyma. 2003. "Extending the Paleobotanical Records at the Hiscock Site, New York: Correlations Among Stratigraphic Pollen Assemblages from Nearby Lake and Wetland Basins." Unknown.
- 1085 Moe, D, K. D Vorren, T Alm, S Fimreite, B Morkved, E Nilssen, A Paus, H Ramfjord, S. F. Selvik, and R. Sorensen. 1996. "Norway." In: *Palaeoecological Events During the Last 15000 Years: Regional Syntheses of Palaeoecological Studies of Lakes and Mires in Europe* Ed. By B.E. Berglund.
- Mokhova, Lyudmila, Pavel Tarasov, Valentina Bazarova, and Mikhail Klimin. 2009. "Quantitative Biome Reconstruction Using Modern and Late Quaternary Pollen Data from the Southern Part of the Russian Far East." *Quaternary Science Reviews* 28 (25-26): 2913–26. <https://doi.org/10.1016/j.quascirev.2009.07.018>.
- 1090 Morales-Molino, C'esar, and Mercedes Garc-Ant'on. 2014. "Vegetation and Fire History Since the Last Glacial Maximum in an Inland Area of the Western Mediterranean Basin (Northern Iberian Plateau, NW Spain)." *Quaternary Research* 81 (1): 63–77. <https://doi.org/10.1016/j.yqres.2013.10.010>.
- 1095 Morales-Molino, C'esar, Mercedes Garc-Ant'on, Jos'e M. Postigo-Mijarra, and Carlos Morla. 2013. "Holocene Vegetation, Fire and Climate Interactions on the Westernmost Fringe of the Mediterranean Basin." *Quaternary Science Reviews* 59 (January): 5–17. <https://doi.org/10.1016/j.quascirev.2012.10.027>.
- Morita, Y. 1987. "The Vegetational History of the Subalpine Zone in Northeast Japan: III." *The Hakkoda Mountains. Japanese Journal of Ecology*.
- Mott, R. J. 2010. "Late-Pleistocene and Holocene Palynology in Southeastern Québec." *Géographie Physique Et Quaternaire* 31 (1-2): 139–49. <https://doi.org/10.7202/1000060ar>.
- 1100 Mott, Robert J., Ian R. Walker, Samantha L. Palmer, and Martin Lavoie. 2009. "A Late-Glacial Holocene Palaeoecological Record from Pye Lake on the Eastern Shore of Nova Scotia, Canada Geological Survey of Canada Contribution 20080395." Edited by Joe Desloges. *Canadian Journal of Earth Sciences* 46 (9): 637–50. <https://doi.org/10.1139/e09-034>.

- 1105 Nakagawa, T. 1998. "Etudes Palynologiques Dans Les Alpes Francaises Centrales Et Meridionales: Histoire de La Vegetation Tardiglaciaire Et Holocene [Pollen Studies in the Central Meridional French Alps: Lateglacial and Holocene Vegetation History]." Doctoral Dissertation. Universite d'Aix-Marseille.
- Nelson, David M., and Feng Sheng Hu. 2008. "Patterns and Drivers of Holocene Vegetational Change Near the Prairieforest Ecotone in Minnesota: Revisiting McAndrews' Transect." *New Phytologist* 179 (2): 449–59.  
1110 <https://doi.org/10.1111/j.1469-8137.2008.02482.x>.
- Nilssen, E. J. 1983. "Klima - Og Vegetasjonshistoriske Undersokelser i Lofoten." Master's Thesis. University of Tromso.
- Nilsson, T. 1964. "Standard Pollen Diagramme Und C14 Datering i Agerods Mosse i Mittleren Schonen." *Lunds Universitets Arsskrift N. F.*
- Novenko, Elena Yu., Andrey N. Tsyganov, Elena M. Volkova, Dmitrii A. Kupriyanov, Iya V. Mironenko, Kirill V.  
1115 Babeshko, Alisa S. Utkina, Viktor Popov, and Yuri A. Mazei. 2016. "Mid- and Late Holocene Vegetation Dynamics and Fire History in the Boreal Forest of European Russia: A Case Study from Meshchera Lowlands." *Palaeogeography, Palaeoclimatology, Palaeoecology* 459 (October): 570–84. <https://doi.org/10.1016/j.palaeo.2016.08.004>.
- Novenko, E. Yu., E. M. Volkova, N. B. Nosova, and I. S. Zuzanova. 2009. "Late Glacial and Holocene Landscape Dynamics in the Southern Taiga Zone of East European Plain According to Pollen and Macrofossil Records from the Central  
1120 Forest State Reserve (Valdai Hills, Russia)." *Quaternary International* 207 (1-2): 93–103.  
<https://doi.org/10.1016/j.quaint.2008.12.006>.
- Odgaard, B. V. 1988. "Heathland History in Western Jutland, Denmark." In: *The Cultural Landscape - Past*.
- Oswald, W. Wyatt, David R. Foster, Bryan N. Shuman, Elaine D. Doughty, Edward K. Faison, Brian R. Hall, Barbara C. S.  
1125 Hansen, Matts Lindbladh, Adriana Marroquin, and Sarah A. Truebe. 2018. "Subregional Variability in the Response of New England Vegetation to Postglacial Climate Change." *Journal of Biogeography* 45 (10): 2375–88.  
<https://doi.org/10.1111/jbi.13407>.
- Ouguerram, A. 2002. "Histoire de La Vallee de l'erdre (Affluent de La Loire, Massif Armoricaire, France) de La Fin Du Tardiglaciaire Aux Epoques Actuelles." Doctoral Dissertation. Universite Moulay Ismail (Maroc) Et Universite de Nantes (France).
- 1130 Paus, A. 1982. "Vegetasjonshistoriske Undersokelser i Sandvikvatn, Karsto, Tysvaer i Rogaland." *Botanisk Institutt*.
- Peñalba, M. Cristina, and Serge Payette. 1997. "Late-Holocene Expansion of Eastern Larch (*Larix Laricina* [du Roi] k. Koch) in Northwestern Québec." *Quaternary Research* 48 (1): 114–21. <https://doi.org/10.1006/qres.1997.1906>.
- Pennington, W. 1973. "Absolute Pollen Frequencies in the Sediments of Lakes of Different Morphometry." In: *Quaternary Plant Ecology* Ed. By H.J.B. Birks and R.G. West (Pp.79-104). Blackwell Scientific Publications.
- 1135 Peros, Matthew C., and Konrad Gajewski. 2008. "Holocene Climate and Vegetation Change on Victoria Island, Western Canadian Arctic." *Quaternary Science Reviews* 27 (3-4): 235–49. <https://doi.org/10.1016/j.quascirev.2007.09.002>.

- PETEET, DOROTHY, ANDREI ANDREEV, WILLIAM BARDEEN, and FRANCESCA MISTRETTA. 2008. "Long-Term Arctic Peatland Dynamics, Vegetation and Climate History of the Pur-Taz Region, Western Siberia." *Boreas* 27 (2): 115–26. <https://doi.org/10.1111/j.1502-3885.1998.tb00872.x>.
- 1140 Puertas, O. 1997. "Evolution de La Vegetation Depuis Le Dryas Recent Dans La Plaine Littorale de Montpellier (Herault, France) a Partir de l'analyse Pollinique." *Dynamique Naturelle Et Anthropisation Du Milieu*. Doctoral Dissertation. Universite de Franche-Comte.
- Pulido, M. 2006. "Consequenses de l'anthropisation Sur La Dynamique Postglaciaire de La Vegetation Dans Le Sud Du Massif Central, France." [Anthropogenic Impact on the Postglacial Vegetation Dynamics in South Massif Central.
- 1145 Ravindra, R. 2009. "A High-Resolution Vegetation, Fire, and Climate History from the Aishihik Region, Yukon Territory, Canada." Master's Thesis. University of Ottawa.
- Richard, P. J. H. 1977. "Histoire Post-Wisconsinienne de La Vegetation Du Quebec Meridional Par l'analyse Pollinique." *Service de La Recherche*.
- Richard, P. J. H. 1981. "Paleophytogeographie Postglaciaire En Ungava Par l'analyse Pollinique." *Collection Paleo-Quebec*.
- 1150 Richard, Pierre J. H., Alayn Larouche, and Michel A. Bouchard. 2007. "Âge de La déglaciation Finale Et Histoire Postglaciaire de La végétation Dans La Partie Centrale Du Nouveau-Québec." *Géographie Physique Et Quatenaire* 36 (1-2): 63–90. <https://doi.org/10.7202/032470ar>.
- Rippke, Molly Beland, Matthew T. Distler, and John M. Farrell. 2010. "Holocene Vegetation Dynamics of an Upper St. Lawrence River Wetland: Paleoecological Evidence for a Recent Increase in Cattail (Typha)." *Wetlands* 30 (4): 805–16. <https://doi.org/10.1007/s13157-010-0068-0>.
- 1155 Ritchie, J. C. 1976. "The Late-Quaternary Vegetational History of the Western Interior of Canada." *Canadian Journal of Botany* 54 (15): 1793–1818. <https://doi.org/10.1139/b76-194>.
- Rohr, M. 2001. "Paleoenvironmental Changes at Treeline: A 6,500 Year Long Pollen and Stable Isotope Record." Master's Thesis. University of Alaska.
- 1160 Roleček, Jan, Helena Svitavsk'a Svobodov'a, Eva Jamrichov'a, Lydie Dudov'a, Petra H'ajkov'a, Günther Kletetschka, Petr Kuneš, and Vojtěch Abraham. 2020. "Conservation Targets from the Perspective of a Palaeoecological Reconstruction." *Preslia* 92 (2). <https://doi.org/10.23855/preslia.2020.087>.
- Rosch, M. 1989. "Breitnau-Neuhof Pollen Profile: On the Temporal Course of the Holocene Vegetation Development in the Southern Black Forest." *Carolinea*.
- 1165 Rösch, Manfred. 2009. "Botanical Evidence for Prehistoric and Medieval Land Use in the Black Forest." In *Ruralia*, 335–43. Brepols Publishers. <https://doi.org/10.1484/m.ruralia-eb.3.1181>.
- Rybnicek, K., and E. Rybnickova. 2004. "Pollen Analyses of Sediments from the Summit of the Praded Range in the Hruby Jeseník Mts (Eastern Sudetes)." *Preslia*.

- 1170 Rybnickova, E, P. Hajkova, and K. Rybnicek. 2005. "The Origin and Development of Spring Fen Vegetation and  
Ecosystems - Palaeogeobotanical Results." In: Ecology and Palaeoecology of Spring Fens of the West Carpathians Ed.  
By A. Poulickova.
- Saarse, L, S Veski, A Heinsalu, R. Rajamae, and T. Martma. 1995. "Litho- and Biostratigraphy of Lake Paidre, South  
Estonia." Proceedings of the Estonian Academy of Sciences. Geology.
- 1175 Savoie, Louise, and Pierre Richard. 2010. "Paléophytogéographie de l'épisode de Saint-Narcisse Dans La région de Sainte-  
Agathe, Québec." Géographie Physique Et Quaternaire 33 (2): 175–88. <https://doi.org/10.7202/1000067ar>.
- Schauffler, M. 1998. "Paleoecology of Coastal and Interior Picea (Spruce) Stands in Maine." Doctoral Dissertation.  
University of Maine.
- Schwörer, Christoph, Daniele Colombaroli, Petra Kaltenrieder, Fabian Rey, and Willy Tinner. 2015a. "Early Human Impact  
(5000-3000 BC) Affects Mountain Forest Dynamics in the Alps." Edited by Amy Austin. Journal of Ecology 103 (2):  
1180 281–95. <https://doi.org/10.1111/1365-2745.12354>.
- Snyder, G. G, L. C. K. Shane, and R. O. Kapp. 1991. "Palynological Studies Associated with the Mound City Group  
National Monument, Chillicothe, Ohio." Unknown.
- Solovieva, Nadia, Pavel E. Tarasov, and Glen MacDonald. 2005. "Quantitative Reconstruction of Holocene Climate from  
the Chuna Lake Pollen Record, Kola Peninsula, Northwest Russia." The Holocene 15 (1): 141–48.  
1185 <https://doi.org/10.1191/0959683605hl793rr>.
- Stebich, Martina, Kira Rehfeld, Frank Schlütz, Pavel E. Tarasov, Jiaqi Liu, and Jens Mingram. 2015. "Holocene Vegetation  
and Climate Dynamics of NE China Based on the Pollen Record from Sihailongwan Maar Lake." Quaternary Science  
Reviews 124 (September): 275–89. <https://doi.org/10.1016/j.quascirev.2015.07.021>.
- 1190 Stuiver, Minze. 1975. "Climate Versus Changes in 13c Content of the Organic Component of Lake Sediments During the  
Late Quarternary." Quaternary Research 5 (2): 251–62. [https://doi.org/10.1016/0033-5894\(75\)90027-7](https://doi.org/10.1016/0033-5894(75)90027-7).
- Sun, Aizhi, Zhaodong Feng, Min Ran, and Chengjun Zhang. 2013. "Pollen-Recorded Bioclimatic Variations of the Last  
22,600 Years Retrieved from Achit Nur Core in the Western Mongolian Plateau." Quaternary International 311 (October):  
36–43. <https://doi.org/10.1016/j.quaint.2013.07.002>.
- 1195 Sun, Huiling, Aifeng Zhou, Xiaowei Zhang, and Fahu Chen. 2011. "Fir Trees Disappeared 500years Ago in the Liupan  
Mountains on the Southwestern Loess Plateau, China." Review of Palaeobotany and Palynology 166 (1-2): 69–75.  
<https://doi.org/10.1016/j.revpalbo.2011.05.003>.
- Suter, S. M. 1985. "Late-Glacial and Holocene Vegetation History in Southeastern Massachusetts: A 14,000 Year Pollen  
Record." Current Research in the Pleistocene.
- 1200 Svobodov'a, Helena, Maurice Reille, and Claude Goeury. 2001. "Past Vegetation Dynamics of Vltavský Luh, Upper Vltava  
River Valley in the Šumava Mountains. Czech Republic." Vegetation History and Archaeobotany 10 (4): 185–99.  
<https://doi.org/10.1007/pl00006930>.

- Svobodov'a, Helena, Lenka Soukupov'a, and Maurice Reille. 2002. "Diversified Development of Mountain Mires, Bohemian Forest, Central Europe, in the Last 13,000 Years." *Quaternary International* 91 (1): 123–35. [https://doi.org/10.1016/s1040-6182\(01\)00106-9](https://doi.org/10.1016/s1040-6182(01)00106-9).
- 1205 Svobodova, H. 1989. "Rekonstrukce Prirodniho Prostredi a Osidleni v Okoli Mistrina." *Palynologiccka Studie Reconstitution de l'environnement Naturel Et Du Peuplement Dans Les Environs de Mistrin. Etude Palynologique. Pamatky Archeologicke*.
- 1210 Szeicz, Julian M., Glen M. MacDonald, and Alejandra Duk-Rodkin. 1995. "Late Quaternary Vegetation History of the Central Mackenzie Mountains, Northwest Territories, Canada." *Palaeogeography, Palaeoclimatology, Palaeoecology* 113 (2-4): 351–71. [https://doi.org/10.1016/0031-0182\(95\)00070-3](https://doi.org/10.1016/0031-0182(95)00070-3).
- Tarasov, P. E., S. P Harrison, L Saarse, M. Y Pushenko, A. A Andreev, Z. V Aleshinskaya, N. N Davydova, et al. 1994. "Lake Status Records from the Former Soviet Union and Mongolia: Data Base Documentation." *Paleoclimatology Publications Series 2*.
- 1215 Tarasov, P. E., and K. V. Kremenetskii. 1995. "Geochronology and Stratigraphy of the Holocene Lacustrine-Bog Deposits in Northern and Central Kazakhstan." *Stratigraphy and Geological Correlation*.
- Teed, Rebecca, Charles Umbanhower, and Philip Camill. 2009. "Multiproxy Lake Sediment Records at the Northern and Southern Boundaries of the Aspen Parkland Region of Manitoba, Canada." *The Holocene* 19 (6): 937–48. <https://doi.org/10.1177/0959683609336569>.
- 1220 Thöle, Lena, Christoph Schwörer, Daniele Colombaroli, Erika Gobet, Petra Kaltenrieder, Jacqueline van Leeuwen, and Willy Tinner. 2015. "Reconstruction of Holocene Vegetation Dynamics at Lac de Bretaye, a High-Mountain Lake in the Swiss Alps." *The Holocene* 26 (3): 380–96. <https://doi.org/10.1177/0959683615609746>.
- 1225 Thompson, R. S. 1984a. "Late Pleistocene and Holocene Environments in the Great Basin." Doctoral Dissertation. University of Arizona.
- Tonkov, Spassimir, Elissaveta Bozilova, and Högne Jungner. 2009. "7. Mire Straldza (Southeastern Bulgaria): Late Holocene Vegetation History." *Grana* 48 (3): 235–37. <https://doi.org/10.1080/00173130902965843>.
- van der Knaap, W. O., and B. Ammann. 1997. "Depth-Age Relationships of 25 Well-Dated Swiss Holocene Pollen Sequences Archived in the Alpine Palynological Data-Base." *Revue de Paleobiologie*.
- 1230 Van der Knaap, W. O., and J. van Leeuwen. 1994. "Holocene Vegetation, Human Impact, and Climatic Change in the Serra Da Estrela, Portugal." *Dissertationes Botanicae*.
- van der Knaap, W. O., and J. F. N. Van Leeuwen. 2001. "Vegetationsgeschichte Und Menschlicher Einfluss in Der Umgebung Des Bibersees Zwischen 2600 Und 50 v." *Chr. Cham-Oberwil*.
- 1235 van der Knaap, W. O, Jacqueline F. N van Leeuwen, Andreas Fankhauser, and Brigitta Ammann. 2000. "Palynostratigraphy of the Last Centuries in Switzerland Based on 23 Lake and Mire Deposits: Chronostratigraphic Pollen Markers,

Regional Patterns, and Local Histories.” *Review of Palaeobotany and Palynology* 108 (1-2): 85–142.

[https://doi.org/10.1016/s0034-6667\(99\)00035-4](https://doi.org/10.1016/s0034-6667(99)00035-4).

Van Zant, Kent. 1979. “Late Glacial and Postglacial Pollen and Plant Macrofossils from Lake West Okoboji, Northwestern Iowa.” *Quaternary Research* 12 (3): 358–80. [https://doi.org/10.1016/0033-5894\(79\)90034-6](https://doi.org/10.1016/0033-5894(79)90034-6).

1240 van Zeist, W., and M. R. van der Spoel-Walvius. 1980. “A Palynological Study of the Late-Glacial and the Postglacial in the Paris Basin.” *Palaeohistoria*.

van Zeist, W, H. Woldring, and D. Stapert. 1975. “Late Quaternary Vegetation and Climate of Southwestern Turkey.” *Palaeohistoria*.

1245 Velle, Gaute, Jorunn Larsen, Wenche Eide, Sylvia M. Peglar, and H. John. B. Birks. 2005a. “Holocene Environmental History and Climate of ratasjoen, a Low-Alpine Lake in South-Central Norway.” *Journal of Paleolimnology* 33 (2): 129–53. <https://doi.org/10.1007/s10933-004-2689-x>.

Vescovi, Elisa, Petra Kaltenrieder, and Willy Tinner. 2010. “Late-Glacial and Holocene Vegetation History of Pavullo Nel Frignano (Northern Apennines, Italy).” *Review of Palaeobotany and Palynology* 160 (1-2): 32–45. <https://doi.org/10.1016/j.revpalbo.2010.01.002>.

1250 Visset, L. 1979. “Recherches Palynologiques Sur La Vegetation Pleistocene Et Holocene de Quelques Sites Du District Phytogeographique de Basse-Loire.” Doctoral Dissertation. Universite d’Aix-Marseille.

Voeltzel, D. 1987. “Recherches Pollenanalytiques Sur La Vegetation Holocene de La Plaine Alluviale de l’estuaire de La Loire Et Des Coteaux Environnants.” Doctoral Dissertation. Universite d’Aix-Marseille.

1255 Wacnik, A. 1995. “The Vegetational History of Local Flora and Evidences of Human Activities Recorded in the Pollen Diagram from Side Regetovka, Northeast Slovakia.” *Acta Palaeobotanica*.

Waller, M. 1994. “The Fenland Project, Number 9: Flandrian Environmental Change in Fenland (No.” 70). Cambridgeshire Archaeological Committee.

Waller, M. P. 1987. “The Flandrian Vegetational History and Environmental Development of the Brede and Panel Valleys East Sussex.” Doctoral Dissertation. Polytechnic of North London.

1260 Waller, M. P. 1993. “Flandrian Vegetational History of Southeastern England. Pollen Data from Pannel Bridge, East Sussex.” *New Phytologist* 124 (2): 345–69. <https://doi.org/10.1111/j.1469-8137.1993.tb03825.x>.

Waller, M. P., A. J. Long, D. Long, and J. B. Innes. 1999. “Patterns and Processes in the Development of Coastal Mire Vegetation: Multi-Site Investigations from Walland Marsh, Southeast England.” *Quaternary Science Reviews* 18 (12): 1419–44. [https://doi.org/10.1016/s0277-3791\(98\)00072-9](https://doi.org/10.1016/s0277-3791(98)00072-9).

1265 Wang, Yue, Jacquelyn L. Gill, Jeremiah Marsicek, Anna Dierking, Bryan Shuman, and John W Williams. 2015. “Pronounced Variations in *fagus Grandifolia* Abundances in the Great Lakes Region During the Holocene.” *The Holocene* 26 (4): 578–91. <https://doi.org/10.1177/0959683615612586>.



- Warner, Barry G., Kimmo Tolonen, and Mirjami Tolonen. 1991. "A Postglacial History of Vegetation and Bog Formation at Point Escuminac, New Brunswick." *Canadian Journal of Earth Sciences* 28 (10): 1572–82. <https://doi.org/10.1139/e91-141>.  
1270
- Watson, Clare S. 1996. "The Vegetational History of the Northern Apennines, Italy: Information from Three New Sequences and a Review of Regional Vegetational Change." *Journal of Biogeography* 23 (6): 805–41. <https://doi.org/10.1111/j.1365-2699.1996.tb00041.x>.
- Welten, M. 1982. "Pollenanalytische Untersuchungen Zur Vegetationsgeschichte Des Schweizerischen Nationalparks." *Ergebnisse Der Wissenschaftlichen Untersuchungen Im Schweizerischen Nationalpark*.  
1275
- Welten, Max. 1982. *Vegetationsgeschichtliche Untersuchungen in Den Westlichen Schweizer Alpen: Bern-Wallis*. Birkhäuser Basel. <https://doi.org/10.1007/978-3-0348-5359-0>.
- WEN, RUILIN, JULE XIAO, ZHIGANG CHANG, DAYOU ZHAI, QINGHAI XU, YUECONG LI, and SHIGERU ITOH. 2010. "Holocene Precipitation and Temperature Variations in the East Asian Monsoonal Margin from Pollen Data from Hulun Lake in Northeastern Inner Mongolia, China." *Boreas* 39 (2): 262–72. <https://doi.org/10.1111/j.1502-3885.2009.00125.x>.  
1280
- Weninger, J. M., and J. H. McAndrews. 1989. "Late Holocene Aggradation in the Lower Humber River Valley, Toronto, Ontario." *Canadian Journal of Earth Sciences* 26 (9): 1842–49. <https://doi.org/10.1139/e89-157>.
- West, G. J., and K. R. McGuire. 2002. "9,500 Years of Burning Recorded in a High Desert Marsh." Unknown.
- Whitehead, Donald R. 1979. "Late-Glacial and Postglacial Vegetational History of the Berkshires, Western Massachusetts." *Quaternary Research* 12 (3): 333–57. [https://doi.org/10.1016/0033-5894\(79\)90033-4](https://doi.org/10.1016/0033-5894(79)90033-4).  
1285
- Whitehead, Donald R., and Stephen T. Jackson and. 1990. *The Regional Vegetational History of the High Peaks (Adirondack Mountains) New York*. University of the State of New York, State Education Dept., New York State Museum, Biological Survey. <https://doi.org/10.5962/bhl.title.135552>.
- Willard, D. A., L. M. Weimer, and W. L. Riegel. 2001. "Pollen Assemblages as Paleoenvironmental Proxies in the Florida Everglades." *Review of Palaeobotany and Palynology* 113 (4): 213–35. [https://doi.org/10.1016/s0034-6667\(00\)00042-7](https://doi.org/10.1016/s0034-6667(00)00042-7).  
1290
- WILLARD, D, C BERNHARDT, D KOREJWO, and S MEYERS. 2005. "Impact of Millennial-Scale Holocene Climate Variability on Eastern North American Terrestrial Ecosystems: Pollen-Based Climatic Reconstruction." *Global and Planetary Change* 47 (1): 17–35. <https://doi.org/10.1016/j.gloplacha.2004.11.017>.
- Wolfe, Brent B., Thomas W. D. Edwards, Ramon Aravena, Steven L. Forman, Barry G. Warner, Andrei A. Velichko, and Glen M. MacDonald. 2000. "Holocene Paleohydrology and Paleoclimate at Treeline, North-Central Russia, Inferred from Oxygen Isotope Records in Lake Sediment Cellulose." *Quaternary Research* 53 (3): 319–29. <https://doi.org/10.1006/qres.2000.2124>.  
1295
- Woods, Kerry D., and Margaret B. Davis. 1989. "Paleoecology of Range Limits: Beech in the Upper Peninsula of Michigan." *Ecology* 70 (3): 681–96. <https://doi.org/10.2307/1940219>.  
1300

- Wu, L, X. Y Wang, G. S. Zhang, and X. Y. Xiao. 2008. "Vegetation Evolution and Climate Change Since the Holocene Recorded by Pollen-Charcoal Assemblages from Lacustrine Sediments of Chaohu Lake in Anhui Province." *Journal of Palaeogeography*.
- 1305 Xia, Y. M. 1988. "Preliminary Study on Vegetational Development and Climatic Changes in the Sanjiang Plain in the Last 12000 Years." *Scientia Geographica Sinica*.
- Xu, Q. H, X. L Yang, Z. J Yang, W. D. Liang, and L. M. Sun. 2004. "Reconstruction of Climatic Changes of Yanshan Mountain Area Since 5000 aB.p." Inferred from Pollen Data. *Scientia Geographica Sinica*.
- Xu, Q. H, Z. J Yang, Z. J Cui, X. L. Yang, and W. D. Liang. 2002. "A Study on Pollen Analysis of Qiguoshan Section and Ancestor Living Environment in Chifeng Area, Nei Mongol." *Scientia Geographica Sinica*.
- 1310 Yang, X. D, Y. X Zhu, X. Z Jiang, Y. H. Wu, and S. M. Wang. 1998. "Environmental Changes from Spore-Pollen Record of Mianyang Region over the Past 10000 Years." *Journal of Lake Sciences*.
- Zhang, Z. Q, Q. H Xu, Y. C Li, X. L Yang, Z. C. Jing, and J. G. Tang. 2007. "Environmental Change of the Yin Ruins Area Based on Pollen Analysis." *Quaternary Research*.
- 1315 Zhao, Cheng, Zicheng Yu, Emi Ito, and Yan Zhao. 2010. "Holocene Climate Trend, Variability, and Shift Documented by Lacustrine Stable-Isotope Record in the Northeastern United States." *Quaternary Science Reviews* 29 (15-16): 1831–43. <https://doi.org/10.1016/j.quascirev.2010.03.018>.
